# Supplementary material for: Metabolic Pathway Pairwise-Based Signature as a Potential Non-Invasive Diagnostic Marker in Alzheimer’s Disease Patients
Source: Genes (Basel). 2023 Jun 17;14(6):1285. doi: 10.3390/genes14061285 (PMC10298314; doi:10.3390/genes14061285)
Supplement: Supplementary file 1 [file genes-14-01285-s001.zip › Table S1-S8.xlsx]

## Sheet: Table S1
Table S1. Overview Table of AD/Non-AD Sample Quantity, Tissue Type, and Platform Across Multiple Datasets
	AD	non-AD	Tissue	Type	Platform
GSE63060	145	104	blood	PMID: 26343147	GPL6947Illumina HumanHT-12 V3.0 expression beadchip
GSE63061	139	134	blood	PMID: 26343147	GPL10558Illumina HumanHT-12 V4.0 expression beadchip
GSE140829	204	249	blood	missing	GPL15988HumanHT-12 v4 Expression BeadChip (nuID)
GSE97760	9	10	blood	PMID: 25079797	GPL16699	Agilent-039494 SurePrint G3 Human GE v2 8x60K Microarray 039381 (Feature Number version)
GSE148822	16	8	occipital cortex	PMID: 33609158	GPL18573	Illumina NextSeq 500 (Homo sapiens)
GSE163877	3	4	brain	PMID: 35022475	GPL17303Ion Torrent Proton (Homo sapiens)
GSE104704	12	10	lateral temporal lobe	PMID: 29507413	GPL18573Illumina NextSeq 500 (Homo sapiens)
	Traning & Testing dataset
	External validation set

## Sheet: Table S2
Table S2. 84 KEGG metabolism pathway
KEGG ID	KEGG Metabolism Pathway Subcategories	KEGG Metabolism Pathway Description
hsa00020	Carbohydrate metabolism	Citrate cycle (TCA cycle)
hsa00030	Carbohydrate metabolism	Pentose phosphate pathway
hsa00040	Carbohydrate metabolism	Pentose and glucuronate interconversions
hsa00051	Carbohydrate metabolism	Fructose and mannose metabolism
hsa00052	Carbohydrate metabolism	Galactose metabolism
hsa00053	Carbohydrate metabolism	Ascorbate and aldarate metabolism
hsa00061	Lipid metabolism	Fatty acid biosynthesis
hsa00062	Lipid metabolism	Fatty acid elongation
hsa00071	Lipid metabolism	Fatty acid degradation
hsa00100	Lipid metabolism	Biosynthesis of steroids
hsa00120	Lipid metabolism	Primary bile acid biosynthesis
hsa00130	Metabolism of cofactors and vitamins	Ubiquinone and other terpenoid-quinone biosynthesis
hsa00140	Lipid metabolism	Steroid hormone biosynthesis
hsa00220	Amino acid metabolism	Arginine biosynthesis
hsa00230	Nucleotide metabolism	Purine metabolism
hsa00232	Biosynthesis of other secondary metabolites	Caffeine metabolism
hsa00240	Nucleotide metabolism	Pyrimidine metabolism
hsa00250	Amino acid metabolism	Alanine, aspartate and glutamate metabolism
hsa00260	Amino acid metabolism	Glycine, serine and threonine metabolism
hsa00270	Amino acid metabolism	Cysteine and methionine metabolism
hsa00280	Amino acid metabolism	Valine, leucine and isoleucine degradation
hsa00290	Amino acid metabolism	Valine, leucine and isoleucine biosynthesis
hsa00310	Amino acid metabolism	Lysine degradation
hsa00330	Amino acid metabolism	Arginine and proline metabolism
hsa00340	Amino acid metabolism	Histidine metabolism
hsa00350	Amino acid metabolism	Tyrosine metabolism
hsa00360	Amino acid metabolism	Phenylalanine metabolism
hsa00380	Amino acid metabolism	Tryptophan metabolism
hsa00400	Amino acid metabolism	Phenylalanine, tyrosine and tryptophan biosynthesis
hsa00410	Metabolism of other amino acids	beta-Alanine metabolism
hsa00430	Metabolism of other amino acids	Taurine and hypotaurine metabolism
hsa00440	Metabolism of other amino acids	Phosphonate and phosphinate metabolism
hsa00450	Metabolism of other amino acids	Selenocompound metabolism
hsa00470	Metabolism of other amino acids	D-Amino acid metabolism
hsa00480	Metabolism of other amino acids	Glutathione metabolism
hsa00500	Carbohydrate metabolism	Starch and sucrose metabolism
hsa00510	Glycan biosynthesis and metabolism	N-Glycan biosynthesis
hsa00511	Glycan biosynthesis and metabolism	Other types of O-glycan biosynthesis
hsa00512	Glycan biosynthesis and metabolism	Mucin type O-glycan biosynthesis
hsa00513	Glycan biosynthesis and metabolism	Various types of N-glycan biosynthesis
hsa00514	Glycan biosynthesis and metabolism	Other types of N-glycan biosynthesis
hsa00515	Glycan biosynthesis and metabolism	Mannose type O-glycan biosynthesis
hsa00520	Carbohydrate metabolism	Amino sugar and nucleotide sugar metabolism
hsa00524	Biosynthesis of other secondary metabolites	Neomycin, kanamycin and gentamicin biosynthesis
hsa00531	Glycan biosynthesis and metabolism	Glycosaminoglycan degradation
hsa00532	Glycan biosynthesis and metabolism	Glycosaminoglycan biosynthesis - chondroitin sulfate / dermatan sulfate
hsa00533	Glycan biosynthesis and metabolism	Glycosaminoglycan biosynthesis - keratan sulfate
hsa00534	Glycan biosynthesis and metabolism	Glycosaminoglycan biosynthesis - heparan sulfate / heparin
hsa00561	Lipid metabolism	Glycerolipid metabolism
hsa00562	Carbohydrate metabolism	Inositol phosphate metabolism
hsa00563	Glycan biosynthesis and metabolism	Glycosylphosphatidylinositol (GPI)-anchor biosynthesis
hsa00564	Lipid metabolism	Glycerophospholipid metabolism
hsa00565	Lipid metabolism	Ether lipid metabolism
hsa00590	Lipid metabolism	Arachidonic acid metabolism
hsa00591	Lipid metabolism	Linoleic acid metabolism
hsa00592	Lipid metabolism	alpha-Linolenic acid metabolism
hsa00600	Lipid metabolism	Sphingolipid metabolism
hsa00601	Glycan biosynthesis and metabolism	Glycosphingolipid biosynthesis - lacto and neolacto series
hsa00603	Glycan biosynthesis and metabolism	Glycosphingolipid biosynthesis - globo and isoglobo series
hsa00604	Glycan biosynthesis and metabolism	Glycosphingolipid biosynthesis - ganglio series
hsa00620	Carbohydrate metabolism	Pyruvate metabolism
hsa00630	Carbohydrate metabolism	Glyoxylate and dicarboxylate metabolism
hsa00640	Carbohydrate metabolism	Propanoate metabolism
hsa00650	Carbohydrate metabolism	Butanoate metabolism
hsa00670	Metabolism of cofactors and vitamins	One carbon pool by folate
hsa00730	Metabolism of cofactors and vitamins	Thiamine metabolism
hsa00740	Metabolism of cofactors and vitamins	Riboflavin metabolism
hsa00750	Metabolism of cofactors and vitamins	Vitamin B6 metabolism
hsa00760	Metabolism of cofactors and vitamins	Nicotinate and nicotinamide metabolism
hsa00770	Metabolism of cofactors and vitamins	Pantothenate and CoA biosynthesis
hsa00780	Metabolism of cofactors and vitamins	Biotin metabolism
hsa00785	Metabolism of cofactors and vitamins	Lipoic acid metabolism
hsa00790	Metabolism of cofactors and vitamins	Folate biosynthesis
hsa00830	Metabolism of cofactors and vitamins	Retinol metabolism
hsa00860	Metabolism of cofactors and vitamins	Porphyrin and chlorophyll metabolism
hsa00900	Metabolism of terpenoids and polyketides	Terpenoid backbone biosynthesis
hsa00910	Energy metabolism	Nitrogen metabolism
hsa00920	Energy metabolism	Sulfur metabolism
hsa00980	Xenobiotics biodegradation and metabolism	Metabolism of xenobiotics by cytochrome P450
hsa00982	Xenobiotics biodegradation and metabolism	Drug metabolism - cytochrome P450
hsa00983	Xenobiotics biodegradation and metabolism	Drug metabolism - other enzymes
hsa01040	Lipid metabolism	Biosynthesis of unsaturated fatty acids
hsa00010	Carbohydrate metabolism	Glycolysis / Gluconeogenesis
hsa00190	Energy metabolism	Oxidative phosphorylation

## Sheet: Table S3
Table S3. Differentially Expressed Genes between AD and Non-AD Samples
SYMBOL	logFC	AveExpr	t	P.Value	adj.P.Val	B	change
NDUFA1	0.412911	10.3172	11.8054	3.70977e-30	4.95626e-26	57.5892	UP
RPS25	0.290858	13.1646	11.418	1.98646e-28	1.32695e-24	53.6539	UP
CETN2	0.159762	9.17997	11.2968	6.75659e-28	3.00894e-24	52.444	UP
NDUFS5	0.388288	9.09411	11.1072	4.50251e-27	1.50384e-23	50.5697	UP
MRPL51	0.220073	8.88979	10.4513	2.62978e-24	7.02678e-21	44.2787	UP
RPA3	0.210944	8.41098	10.4063	4.02594e-24	8.96443e-21	43.8583	UP
DNAJA1	0.297439	9.98048	10.353	6.6572e-24	1.27057e-20	43.3619	UP
CWC15	0.196554	8.38737	10.2038	2.69035e-23	4.49288e-20	41.9837	UP
COX17	0.228398	9.30716	10.1721	3.61271e-23	5.36286e-20	41.6929	UP
MRPL33	0.208464	10.0064	10.1269	5.48984e-23	7.33443e-20	41.28	UP
GTF2H5	0.173394	8.77743	10.1066	6.62668e-23	8.04841e-20	41.0944	UP
ZMAT2	0.255826	9.29389	10.088	7.8653e-23	8.7567e-20	40.9253	UP
EIF3E	0.32934	11.3237	10.0557	1.05867e-22	1.08798e-19	40.6322	UP
CDC26	0.159366	9.0105	9.99985	1.76825e-22	1.57532e-19	40.1262	UP
RPL36AL	0.299941	11.1167	9.99982	1.7687e-22	1.57532e-19	40.1259	UP
GIMAP7	0.343999	10.4957	9.87586	5.47337e-22	4.57026e-19	39.0118	UP
TBCA	0.276819	9.6618	9.77456	1.36632e-21	1.07377e-18	38.1098	UP
C6orf130	0.128921	7.99123	9.71778	2.27412e-21	1.68791e-18	37.6075	UP
ATP5O	0.301063	9.83748	9.64541	4.33805e-21	3.05033e-18	36.9708	UP
ATP5EP2	0.228784	12.6156	9.51468	1.37952e-20	9.21521e-18	35.8306	UP
TOMM7	0.456711	10.7632	9.48727	1.75535e-20	1.11674e-17	35.5932	UP
SSB	0.199799	8.21406	9.41924	3.18412e-20	1.93363e-17	35.0065	UP
HSPE1	0.252906	8.37958	9.27474	1.11517e-19	6.47769e-17	33.7718	UP
MRPS17	0.0981921	7.71568	9.17823	2.55328e-19	1.42132e-16	32.956	NOT
MRPS18C	0.26992	8.37327	9.12221	4.11606e-19	2.19962e-16	32.4858	UP
KIAA0913	-0.147611	9.32046	-9.1008	4.93727e-19	2.537e-16	32.3067	DOWN
MRPS33	0.190603	7.78672	9.00416	1.11716e-18	5.52786e-16	31.5029	UP
GNL2	0.135998	8.33735	8.96108	1.6041e-18	7.65383e-16	31.1468	UP
OCIAD2	0.180954	8.78146	8.8987	2.70141e-18	1.24451e-15	30.6339	UP
LSM5	0.226536	8.4447	8.85329	3.94031e-18	1.75475e-15	30.2625	UP
ATP5J	0.195943	8.4577	8.83966	4.41186e-18	1.90137e-15	30.1513	UP
RPL6	0.220876	12.5051	8.80663	5.798e-18	2.42066e-15	29.8825	UP
RPS12	0.116689	13.8434	8.75798	8.65797e-18	3.50517e-15	29.488	UP
MRPL22	0.178954	7.7824	8.72213	1.16199e-17	4.56592e-15	29.1986	UP
UFC1	0.154814	9.44909	8.67993	1.64101e-17	6.26398e-15	28.8591	UP
DNAJC8	0.152688	10.1982	8.64847	2.12051e-17	7.86946e-15	28.607	UP
LRP3	-0.137825	7.80667	-8.61681	2.74247e-17	9.90252e-15	28.3541	DOWN
ADAM8	-0.175897	9.92961	-8.58436	3.56676e-17	1.254e-14	28.0958	DOWN
BEX2	0.15418	7.59999	8.51672	6.15257e-17	2.10765e-14	27.5598	UP
ENY2	0.259201	8.30649	8.47166	8.82853e-17	2.94873e-14	27.2048	UP
RPS27A	0.290959	10.8716	8.46083	9.62714e-17	3.13704e-14	27.1197	UP
TBC1D2	-0.112333	8.0169	-8.45078	1.04315e-16	3.31821e-14	27.0409	DOWN
SOD1	0.17971	10.5098	8.44428	1.09872e-16	3.41369e-14	26.9898	UP
ERH	0.234272	8.57375	8.43454	1.18737e-16	3.60529e-14	26.9136	UP
ZCCHC7	0.171425	8.20921	8.43034	1.22781e-16	3.64524e-14	26.8807	UP
NBEAL2	-0.179665	9.0501	-8.41948	1.33871e-16	3.88809e-14	26.7957	DOWN
MDH1	0.190773	9.64898	8.41023	1.44085e-16	4.09568e-14	26.7234	UP
C11orf1	0.0972247	7.31058	8.39989	1.56421e-16	4.35372e-14	26.6427	NOT
C16orf79	-0.0748731	7.40668	-8.39585	1.61521e-16	4.40393e-14	26.6112	NOT
SULT1A3	-0.109453	7.78228	-8.37845	1.85424e-16	4.95454e-14	26.4756	DOWN
POLR3GL	0.180146	9.248	8.36111	2.1271e-16	5.49226e-14	26.3407	UP
RPL11	0.232282	12.3763	8.36048	2.13771e-16	5.49226e-14	26.3358	UP
MTIF3	0.144958	8.14889	8.35615	2.21222e-16	5.57646e-14	26.3022	UP
RPL17	0.408283	9.51845	8.34231	2.46778e-16	6.00809e-14	26.1947	UP
MEGF9	-0.138658	7.83205	-8.34202	2.47339e-16	6.00809e-14	26.1925	DOWN
LSM3	0.32163	7.94557	8.31058	3.16915e-16	7.56069e-14	25.949	UP
MKI67IP	0.15884	8.04132	8.2937	3.61899e-16	8.4824e-14	25.8186	UP
SNX2	0.185535	8.977	8.28169	3.97665e-16	9.16001e-14	25.726	UP
PSMC2	0.181799	8.93279	8.25628	4.85316e-16	1.09895e-13	25.5304	UP
AGTRAP	-0.148164	9.05893	-8.21214	6.85053e-16	1.52538e-13	25.1919	DOWN
NUP37	0.12109	8.14645	8.2059	7.19131e-16	1.5733e-13	25.1442	UP
POMP	0.148932	9.75912	8.20351	7.3265e-16	1.5733e-13	25.1259	UP
RPL12	0.150142	11.968	8.2019	7.41901e-16	1.5733e-13	25.1136	UP
DPM1	0.218455	8.41071	8.19532	7.80851e-16	1.63003e-13	25.0633	UP
LDHB	0.273606	9.4434	8.17318	9.27406e-16	1.90618e-13	24.8944	UP
SNRPG	0.370523	9.2379	8.1694	9.5505e-16	1.93325e-13	24.8656	UP
SRP14	0.226302	10.3079	8.16497	9.88379e-16	1.96666e-13	24.8319	UP
TSPAN32	-0.133855	9.16189	-8.16334	1.00099e-15	1.96666e-13	24.8195	DOWN
TCEAL4	0.117442	8.19804	8.15611	1.05866e-15	2.0498e-13	24.7645	UP
FHOD1	-0.0963565	8.13581	-8.15419	1.07451e-15	2.05078e-13	24.7499	NOT
SF3B14	0.253296	8.95161	8.12937	1.30197e-15	2.4499e-13	24.5613	UP
SNRPB2	0.152656	8.79974	8.11745	1.42747e-15	2.64874e-13	24.471	UP
PLRG1	0.134898	8.46903	8.11409	1.46487e-15	2.68092e-13	24.4456	UP
PFDN5	0.349954	10.231	8.09978	1.63574e-15	2.95318e-13	24.3373	UP
ATP6V1E1	0.164193	10.3201	8.08974	1.76717e-15	3.14791e-13	24.2614	UP
TYK2	-0.145157	10.7784	-8.04675	2.45794e-15	4.32079e-13	23.9376	DOWN
ITGAM	-0.196408	9.89624	-8.03304	2.72991e-15	4.73658e-13	23.8346	DOWN
NAE1	0.15463	8.36026	7.99986	3.51696e-15	6.02392e-13	23.586	UP
RPL4	0.203573	11.3752	7.98509	3.93557e-15	6.65561e-13	23.4756	UP
PSMA4	0.232271	8.14676	7.96513	4.58045e-15	7.64935e-13	23.3267	UP
CCDC72	0.375891	8.97228	7.96114	4.72101e-15	7.78676e-13	23.297	UP
GTF2B	0.155575	8.3179	7.95433	4.97143e-15	8.0998e-13	23.2463	UP
MAN2A2	-0.118018	8.18903	-7.93353	5.82012e-15	9.31142e-13	23.0917	DOWN
DPY30	0.161213	7.79019	7.93275	5.85448e-15	9.31142e-13	23.0859	UP
ARHGAP9	-0.156196	11.7846	-7.91082	6.90985e-15	1.08607e-12	22.9233	DOWN
CKS1B	0.118565	7.66269	7.88515	8.38506e-15	1.30261e-12	22.7335	UP
ACAT1	0.152311	8.04839	7.86597	9.6858e-15	1.48738e-12	22.592	UP
NDUFAF2	0.10786	7.57403	7.85782	1.02975e-14	1.56335e-12	22.532	UP
RPS24	0.456252	10.439	7.85162	1.07873e-14	1.6193e-12	22.4864	UP
SRP19	0.137157	7.96595	7.84435	1.13921e-14	1.69109e-12	22.4329	UP
RPAIN	0.152756	8.31681	7.83022	1.26632e-14	1.85913e-12	22.3292	UP
UQCRB	0.102079	7.09577	7.8041	1.53924e-14	2.23525e-12	22.1378	NOT
SS18L2	0.215367	9.91786	7.79353	1.6655e-14	2.39259e-12	22.0604	UP
TRAPPC4	0.116866	9.08125	7.78382	1.79047e-14	2.54475e-12	21.9895	UP
C14orf156	0.298772	8.59197	7.78081	1.83108e-14	2.57507e-12	21.9675	UP
RPL30	0.204247	12.6469	7.77734	1.87899e-14	2.61493e-12	21.9422	UP
MRPL32	0.162895	8.00704	7.77123	1.96622e-14	2.70812e-12	21.8977	UP
CCDC53	0.162297	8.25834	7.72877	2.69426e-14	3.673e-12	21.5888	UP
NDUFB2	0.237357	9.78081	7.72184	2.83604e-14	3.81568e-12	21.5386	UP
RSL1D1	0.139802	9.18093	7.72089	2.85605e-14	3.81568e-12	21.5317	UP
MBD6	-0.181904	9.87983	-7.71228	3.04365e-14	4.02606e-12	21.4693	DOWN
TAX1BP1	0.245768	9.46015	7.69862	3.36656e-14	4.40954e-12	21.3705	UP
LOC442454	0.378262	8.03454	7.68697	3.66845e-14	4.75831e-12	21.2863	UP
CETN3	0.0844229	7.11144	7.68174	3.81239e-14	4.89745e-12	21.2486	NOT
ZC3H15	0.0944296	7.24183	7.67634	3.96689e-14	5.04277e-12	21.2096	NOT
AIF1	0.188462	8.62134	7.67482	4.01168e-14	5.04277e-12	21.1986	UP
MRPS21	0.169925	8.25373	7.6739	4.03874e-14	5.04277e-12	21.192	UP
CEBPZ	0.189578	8.28466	7.66519	4.30583e-14	5.32647e-12	21.1293	UP
SRP14P1	0.20327	9.09861	7.63456	5.39093e-14	6.6076e-12	20.909	UP
HSPA1L	-0.099706	8.21641	-7.63198	5.49342e-14	6.67201e-12	20.8906	NOT
ANAPC13	0.145775	9.74011	7.62849	5.63554e-14	6.78295e-12	20.8655	UP
RPL23	0.463265	8.55378	7.61876	6.05128e-14	7.21831e-12	20.7958	UP
C20orf3	-0.161351	9.79423	-7.6113	6.39024e-14	7.55519e-12	20.7424	DOWN
ATP5F1	0.143043	9.25487	7.59282	7.31299e-14	8.57031e-12	20.6102	UP
NDUFA8	0.110115	9.17122	7.58743	7.60605e-14	8.83624e-12	20.5717	UP
SH2D1A	0.195716	8.45237	7.57814	8.13828e-14	9.37306e-12	20.5055	UP
C10orf54	-0.16032	11.3775	-7.57189	8.5169e-14	9.72528e-12	20.4609	DOWN
MICAL1	-0.147342	9.14409	-7.561	9.2182e-14	1.04369e-11	20.3834	DOWN
LARP7	0.127316	7.6591	7.55852	9.38561e-14	1.05371e-11	20.3658	UP
ACADVL	-0.128368	9.46156	-7.5263	1.1854e-13	1.31974e-11	20.137	DOWN
CD163	-0.149843	8.20422	-7.51935	1.24655e-13	1.37635e-11	20.0878	DOWN
MAST3	-0.172106	9.90312	-7.50743	1.35863e-13	1.48781e-11	20.0034	DOWN
UTP6	0.123768	8.80943	7.50176	1.41539e-13	1.53736e-11	19.9633	UP
OPLAH	-0.132638	7.5837	-7.49322	1.50528e-13	1.62182e-11	19.903	DOWN
PPIG	0.0916043	7.21175	7.48603	1.58533e-13	1.6944e-11	19.8523	NOT
LSM1	0.198056	9.1443	7.48324	1.61743e-13	1.71499e-11	19.8327	UP
ATP5L	0.183471	9.1553	7.48174	1.63503e-13	1.72e-11	19.8221	UP
HK3	-0.170423	9.57592	-7.47026	1.77575e-13	1.85344e-11	19.7412	DOWN
ATP6V1D	0.154426	9.04784	7.45928	1.92151e-13	1.99003e-11	19.664	UP
BAT5	-0.0873013	8.70005	-7.44868	2.07336e-13	2.13077e-11	19.5895	NOT
COASY	-0.0898892	8.41818	-7.44533	2.12367e-13	2.16582e-11	19.566	NOT
RPL5	0.282088	10.4696	7.44237	2.16931e-13	2.1956e-11	19.5452	UP
ATP6AP1	-0.148544	10.8813	-7.43584	2.27305e-13	2.28331e-11	19.4994	DOWN
TBKBP1	-0.0640431	7.19906	-7.43122	2.34945e-13	2.34244e-11	19.4671	NOT
ICAM3	-0.143822	12.8637	-7.42861	2.39389e-13	2.36906e-11	19.4487	DOWN
MRPS22	0.148191	8.42368	7.42501	2.45621e-13	2.41287e-11	19.4236	UP
LMF2	-0.104951	8.43426	-7.42234	2.50356e-13	2.44143e-11	19.4049	NOT
MRPL39	0.102206	7.87451	7.41849	2.57347e-13	2.48664e-11	19.3779	NOT
OSCAR	-0.177766	9.2158	-7.41775	2.58715e-13	2.48664e-11	19.3727	DOWN
ARID3A	-0.176874	9.68214	-7.4069	2.79549e-13	2.6677e-11	19.2969	DOWN
FAM73B	-0.080178	7.77176	-7.39886	2.96035e-13	2.80499e-11	19.2408	NOT
IGBP1	0.139228	8.65427	7.39363	3.07295e-13	2.89117e-11	19.2042	UP
SFXN5	-0.0794989	7.53811	-7.39209	3.1067e-13	2.90248e-11	19.1936	NOT
H2AFZ	0.146586	11.0393	7.38386	3.29415e-13	3.05624e-11	19.1362	UP
NDUFS4	0.233866	8.13058	7.37991	3.38811e-13	3.12173e-11	19.1087	UP
GNL3	0.134689	7.66275	7.36203	3.84725e-13	3.5205e-11	18.9843	UP
RGS14	-0.0917922	7.91329	-7.35524	4.03706e-13	3.66906e-11	18.9371	NOT
CCDC34	0.0836843	7.43063	7.33938	4.5171e-13	4.07647e-11	18.8272	NOT
COMMD3	0.195107	9.28451	7.33847	4.54636e-13	4.07647e-11	18.8208	UP
DBI	0.125706	7.38143	7.33582	4.63245e-13	4.12597e-11	18.8025	UP
RPS27L	0.173754	7.55128	7.33244	4.74461e-13	4.19788e-11	18.7791	UP
MRPS31	0.137613	8.25605	7.32959	4.84125e-13	4.25521e-11	18.7593	UP
GMIP	-0.135271	8.87787	-7.32101	5.1438e-13	4.49158e-11	18.7	DOWN
TBXAS1	-0.150363	10.3391	-7.31891	5.22064e-13	4.52907e-11	18.6855	DOWN
DNAJC9	0.102065	8.30542	7.30232	5.86915e-13	5.05883e-11	18.5709	NOT
ATP6V1G1	0.249409	9.55451	7.30096	5.92574e-13	5.07486e-11	18.5615	UP
PPA1	0.192111	9.37912	7.27809	6.96058e-13	5.92314e-11	18.404	UP
WDR33	0.0673946	7.68533	7.26396	7.68661e-13	6.49956e-11	18.307	NOT
MRPL17	0.101313	8.19604	7.25893	7.96292e-13	6.69085e-11	18.2724	NOT
RPL35	0.229773	11.2075	7.24944	8.51022e-13	7.10604e-11	18.2074	UP
SLU7	0.152919	8.03412	7.23971	9.11006e-13	7.55965e-11	18.1407	UP
EMG1	0.122817	8.01567	7.23506	9.41114e-13	7.76128e-11	18.1089	UP
APBB3	-0.107998	8.5308	-7.23383	9.49258e-13	7.78042e-11	18.1005	DOWN
UNC13D	-0.0973705	7.86564	-7.23217	9.60333e-13	7.8232e-11	18.0892	NOT
PSMB1	0.152005	10.8389	7.22608	1.0021e-12	8.11399e-11	18.0475	UP
DOK3	-0.088271	7.55967	-7.21777	1.06194e-12	8.54673e-11	17.9908	NOT
UBE2V2	0.111509	7.72944	7.20169	1.18793e-12	9.50343e-11	17.8811	UP
MRPL36	0.124229	8.40605	7.19988	1.20302e-12	9.56689e-11	17.8688	UP
NGDN	0.135883	7.78819	7.19281	1.26367e-12	9.94922e-11	17.8207	UP
MPHOSPH10	0.0838118	7.60404	7.19255	1.26599e-12	9.94922e-11	17.8189	NOT
MYL6	0.182892	12.7156	7.18545	1.33003e-12	1.03913e-10	17.7706	UP
LTV1	0.0952667	8.12646	7.18293	1.35353e-12	1.05135e-10	17.7535	NOT
NCF4	-0.179421	9.45932	-7.16629	1.51934e-12	1.17331e-10	17.6405	DOWN
DENR	0.145039	8.48482	7.15772	1.61226e-12	1.23792e-10	17.5824	UP
C19orf2	0.13325	8.44101	7.1499	1.70198e-12	1.29934e-10	17.5295	UP
NDUFB3	0.294935	8.86561	7.14688	1.7379e-12	1.31922e-10	17.509	UP
RPL7	0.287594	7.89782	7.13653	1.8669e-12	1.40914e-10	17.439	UP
TKT	-0.148277	12.0653	-7.13469	1.89072e-12	1.41696e-10	17.4266	DOWN
FCER1A	0.330371	9.08625	7.1341	1.89847e-12	1.41696e-10	17.4226	UP
COQ5	0.130805	8.40454	7.13142	1.934e-12	1.43546e-10	17.4045	UP
COPS5	0.160307	8.96865	7.12875	1.97e-12	1.4541e-10	17.3865	UP
COX6C	0.240786	9.61006	7.12627	2.00397e-12	1.47105e-10	17.3697	UP
RPAP3	0.0667519	7.31499	7.12347	2.04305e-12	1.49154e-10	17.3509	NOT
MAP3K11	-0.141051	8.81872	-7.12212	2.06221e-12	1.49734e-10	17.3417	DOWN
GEMIN6	0.0866011	7.4559	7.12024	2.08913e-12	1.50869e-10	17.3291	NOT
RPS20	0.221978	12.2228	7.11598	2.15137e-12	1.54529e-10	17.3004	UP
ATP5J2	0.131521	9.45246	7.10615	2.30215e-12	1.64225e-10	17.2341	UP
MITD1	0.122824	8.23919	7.10559	2.31094e-12	1.64225e-10	17.2304	UP
ELF4	-0.138	9.83809	-7.09898	2.4186e-12	1.70965e-10	17.1859	DOWN
PPM1M	-0.0968355	10.3281	-7.09572	2.47335e-12	1.72336e-10	17.164	NOT
MAGOH	0.113551	7.61675	7.09559	2.47561e-12	1.72336e-10	17.1631	UP
ZNF622	0.0885403	8.8879	7.09553	2.47668e-12	1.72336e-10	17.1627	NOT
GNS	-0.146949	11.5104	-7.09323	2.51607e-12	1.74169e-10	17.1473	DOWN
EML4	0.132419	9.20276	7.08598	2.64463e-12	1.82125e-10	17.0986	UP
RPS27	0.287951	13.2166	7.08164	2.72469e-12	1.86676e-10	17.0694	UP
RARS	0.0900992	8.94588	7.07872	2.77971e-12	1.88233e-10	17.0499	NOT
BRI3	-0.143448	10.7735	-7.07851	2.78384e-12	1.88233e-10	17.0484	DOWN
RXRA	-0.157197	11.2117	-7.0782	2.78967e-12	1.88233e-10	17.0464	DOWN
APBB1IP	-0.177163	11.0149	-7.0626	3.10459e-12	2.08429e-10	16.9418	DOWN
FLOT2	-0.142536	12.4064	-7.05861	3.19046e-12	2.13123e-10	16.9152	DOWN
SLC26A6	-0.0910467	7.86537	-7.04698	3.45465e-12	2.29622e-10	16.8374	NOT
COX7C	0.389334	9.80131	7.04191	3.57648e-12	2.36543e-10	16.8035	UP
C7orf43	-0.109735	8.4338	-7.04015	3.61984e-12	2.38232e-10	16.7917	DOWN
RPL35A	0.205025	11.9764	7.03798	3.67367e-12	2.40589e-10	16.7773	UP
SNTB2	-0.0692864	7.33921	-7.03147	3.84056e-12	2.50292e-10	16.7339	NOT
RGL2	-0.11169	8.38083	-7.03034	3.87052e-12	2.5102e-10	16.7263	DOWN
GBA	-0.122237	8.40067	-7.02542	4.00244e-12	2.57518e-10	16.6936	DOWN
ABTB1	-0.152167	10.7551	-7.02517	4.00926e-12	2.57518e-10	16.6919	DOWN
PAK1IP1	0.0830821	7.6927	7.02071	4.13299e-12	2.64195e-10	16.6622	NOT
CLN3	-0.089658	8.05792	-7.01832	4.20095e-12	2.67261e-10	16.6463	NOT
PRDX1	0.137569	9.87873	7.01562	4.27876e-12	2.70921e-10	16.6283	UP
UQCRQ	0.280877	9.32615	7.01473	4.30479e-12	2.71283e-10	16.6224	UP
MKL1	-0.113034	8.24962	-7.01357	4.33909e-12	2.72161e-10	16.6146	DOWN
RAC2	-0.102649	13.1712	-7.01178	4.39204e-12	2.73496e-10	16.6028	NOT
DCTN6	0.0686028	7.19041	7.01147	4.40131e-12	2.73496e-10	16.6007	NOT
GTF2F2	0.126833	8.05247	7.00533	4.58918e-12	2.83502e-10	16.5599	UP
HELZ	-0.096841	8.4733	-7.00483	4.60479e-12	2.83502e-10	16.5566	NOT
HSPH1	0.148414	8.33496	7.00172	4.70313e-12	2.88229e-10	16.5359	UP
UBR4	-0.123184	9.25915	-6.99415	4.95126e-12	3.00682e-10	16.4857	DOWN
COX7B	0.217846	7.56042	6.99415	4.95135e-12	3.00682e-10	16.4857	UP
C4orf34	0.110422	9.41393	6.98438	5.29099e-12	3.19853e-10	16.4208	UP
MED10	0.0986349	8.41188	6.98133	5.40148e-12	3.24219e-10	16.4007	NOT
GORASP1	-0.0855886	8.18054	-6.98105	5.41173e-12	3.24219e-10	16.3988	NOT
TSPO	-0.132479	11.8786	-6.97741	5.54702e-12	3.30583e-10	16.3747	DOWN
LRPAP1	-0.073282	7.80058	-6.97654	5.57959e-12	3.30583e-10	16.369	NOT
ZNF319	-0.0966458	8.67081	-6.97621	5.5922e-12	3.30583e-10	16.3667	NOT
CEBPD	-0.1544	11.7542	-6.97491	5.64162e-12	3.32036e-10	16.3582	DOWN
TMEM60	0.0977374	8.87839	6.97055	5.81058e-12	3.40479e-10	16.3293	NOT
NUP88	0.11903	8.50309	6.96801	5.9113e-12	3.44869e-10	16.3125	UP
RGS19	-0.122362	9.15963	-6.96132	6.18529e-12	3.59285e-10	16.2683	DOWN
UBE2E1	0.18159	9.44785	6.95964	6.25595e-12	3.61816e-10	16.2572	UP
ECHDC3	-0.132123	7.6431	-6.95627	6.40018e-12	3.68562e-10	16.2349	DOWN
STK11IP	-0.081058	7.8802	-6.95496	6.45696e-12	3.70236e-10	16.2263	NOT
DNAJC5	-0.0923084	7.96446	-6.95396	6.50055e-12	3.71143e-10	16.2197	NOT
RPS3A	0.413423	10.2842	6.92501	7.90264e-12	4.49274e-10	16.0289	UP
PITPNM1	-0.112845	9.71771	-6.89374	9.75022e-12	5.51962e-10	15.8238	DOWN
VDAC3	0.0986065	10.3652	6.88497	1.03402e-11	5.82888e-10	15.7664	NOT
CCDC59	0.147444	8.73963	6.88392	1.04136e-11	5.84559e-10	15.7595	UP
PEPD	-0.10097	9.0487	-6.86899	1.15075e-11	6.43262e-10	15.6619	NOT
TCEAL8	0.100072	7.70588	6.86589	1.17482e-11	6.53985e-10	15.6417	NOT
DDX1	0.118005	8.82843	6.86386	1.1909e-11	6.59734e-10	15.6285	UP
TALDO1	-0.109317	10.1243	-6.86334	1.19503e-11	6.59734e-10	15.6251	DOWN
DVL3	-0.0839734	7.90917	-6.85684	1.24806e-11	6.86175e-10	15.5827	NOT
GNAI2	-0.124207	11.7962	-6.85278	1.28235e-11	7.02142e-10	15.5562	DOWN
DYSF	-0.253996	10.8988	-6.84934	1.31212e-11	7.15505e-10	15.5338	DOWN
SEC11C	0.169492	8.26575	6.84768	1.32669e-11	7.2051e-10	15.523	UP
ARHGEF2	-0.109163	11.6129	-6.84042	1.39248e-11	7.53181e-10	15.4758	DOWN
RIC8A	-0.0850855	9.31613	-6.83414	1.45196e-11	7.82183e-10	15.435	NOT
RPS4X	0.163454	11.8567	6.83338	1.45928e-11	7.82972e-10	15.43	UP
VPS8	-0.107601	8.80161	-6.83251	1.46772e-11	7.84352e-10	15.4244	DOWN
RPL26L1	0.112971	7.46439	6.8268	1.52455e-11	8.09505e-10	15.3873	UP
BOLA3	0.104218	8.27815	6.82657	1.52691e-11	8.09505e-10	15.3858	NOT
CISD1	0.124672	8.4821	6.81734	1.62351e-11	8.57317e-10	15.3259	UP
MRPS28	0.0900769	7.26681	6.81643	1.63329e-11	8.58563e-10	15.3201	NOT
SERTAD1	-0.122776	8.92133	-6.81593	1.63872e-11	8.58563e-10	15.3168	DOWN
DPH5	0.111048	7.61117	6.81222	1.67965e-11	8.76569e-10	15.2928	UP
PLOD1	-0.149881	9.46096	-6.8107	1.69664e-11	8.81991e-10	15.2829	DOWN
TTF1	0.0373456	7.19527	6.80577	1.75312e-11	9.07818e-10	15.251	NOT
F5	-0.142398	8.11991	-6.80062	1.81396e-11	9.33252e-10	15.2177	DOWN
KIAA0020	0.0885172	7.68496	6.80043	1.81621e-11	9.33252e-10	15.2165	NOT
UCHL3	0.0988037	7.67641	6.79761	1.85046e-11	9.4721e-10	15.1982	NOT
CSNK1D	-0.109853	8.68763	-6.79004	1.94567e-11	9.92141e-10	15.1493	DOWN
STAB1	-0.0812423	7.36069	-6.78557	2.00399e-11	1.018e-09	15.1204	NOT
TXNDC17	0.198417	8.79436	6.78454	2.01778e-11	1.02112e-09	15.1137	UP
PLCB2	-0.154794	9.84727	-6.78158	2.05763e-11	1.03736e-09	15.0947	DOWN
MED12	-0.0915088	7.74123	-6.7726	2.18343e-11	1.09291e-09	15.0367	NOT
RPL22	0.129767	10.1203	6.77254	2.18419e-11	1.09291e-09	15.0364	UP
ACTN4	-0.140774	8.79112	-6.76607	2.27947e-11	1.13633e-09	14.9947	DOWN
GPR132	-0.0733219	7.66031	-6.7575	2.41208e-11	1.19555e-09	14.9396	NOT
EBNA1BP2	0.0929557	8.62691	6.75724	2.41616e-11	1.19555e-09	14.9379	NOT
HIGD1A	0.153643	8.37347	6.74948	2.54293e-11	1.25004e-09	14.888	UP
CTAGE5	-0.100832	7.91397	-6.74936	2.545e-11	1.25004e-09	14.8872	NOT
VIM	-0.142234	12.6248	-6.74192	2.67269e-11	1.30795e-09	14.8394	DOWN
KLRB1	0.307544	9.69267	6.73579	2.7826e-11	1.35677e-09	14.8001	UP
LTB4R	-0.112034	8.06553	-6.73275	2.83863e-11	1.37906e-09	14.7807	DOWN
VAMP8	0.15739	10.3074	6.7275	2.93827e-11	1.42229e-09	14.747	UP
SLC9A8	-0.10173	8.21237	-6.71735	3.14068e-11	1.51478e-09	14.682	NOT
SWAP70	0.109033	7.98217	6.71606	3.16725e-11	1.5221e-09	14.6738	UP
ADCY4	-0.0875932	7.56778	-6.70993	3.29706e-11	1.57881e-09	14.6346	NOT
ATG16L2	-0.148827	8.88133	-6.7081	3.33685e-11	1.59215e-09	14.6229	DOWN
SNAI3	-0.0659616	7.47987	-6.70469	3.41222e-11	1.62232e-09	14.6011	NOT
PSMA3	0.121831	7.81372	6.69168	3.71522e-11	1.76012e-09	14.5181	UP
SETMAR	0.0555779	7.49189	6.67972	4.01714e-11	1.89643e-09	14.4419	NOT
BAT2	-0.109483	8.00917	-6.66449	4.4363e-11	2.08694e-09	14.3451	DOWN
STX8	0.11328	8.08356	6.66042	4.55544e-11	2.13546e-09	14.3193	UP
SMC3	0.109275	8.13189	6.65722	4.65115e-11	2.1727e-09	14.299	UP
RPS17	0.351303	10.8484	6.65631	4.67873e-11	2.17797e-09	14.2932	UP
FRAT1	-0.129283	8.39843	-6.65359	4.76237e-11	2.20921e-09	14.276	DOWN
HCLS1	-0.132146	12.5572	-6.65174	4.82001e-11	2.22821e-09	14.2642	DOWN
METAP2	0.157022	8.53276	6.64874	4.91491e-11	2.26425e-09	14.2452	UP
DNAJA2	0.129199	9.08261	6.64632	4.99264e-11	2.29215e-09	14.2299	UP
SHFM1	0.043754	7.12091	6.64539	5.02291e-11	2.29815e-09	14.224	NOT
VPS18	-0.0895359	7.99296	-6.64425	5.06028e-11	2.30735e-09	14.2168	NOT
RBX1	0.235534	8.874	6.64316	5.09639e-11	2.31591e-09	14.2099	UP
ZC3H12A	-0.0768643	7.85135	-6.64015	5.19682e-11	2.34972e-09	14.1908	NOT
TMCO1	0.232382	9.00967	6.63988	5.20597e-11	2.34972e-09	14.1891	UP
BEST1	-0.139315	8.58749	-6.63842	5.25546e-11	2.36407e-09	14.1799	DOWN
ATXN7L3	-0.0817106	8.84711	-6.62872	5.59674e-11	2.50914e-09	14.1185	NOT
MRPL50	0.127812	7.42883	6.62581	5.70309e-11	2.54827e-09	14.1002	UP
EEF1E1	0.125387	7.44086	6.62138	5.86915e-11	2.61373e-09	14.0722	UP
CCDC97	-0.0906546	8.85137	-6.61625	6.06723e-11	2.69296e-09	14.0398	NOT
ITPK1	-0.16117	9.06268	-6.6122	6.22852e-11	2.7554e-09	14.0143	DOWN
KIAA1143	0.048721	7.15345	6.604	6.56755e-11	2.89579e-09	13.9626	NOT
POLR2A	-0.15233	9.85393	-6.60132	6.6823e-11	2.9367e-09	13.9457	DOWN
SOLH	-0.126731	8.08549	-6.59656	6.89059e-11	3.0183e-09	13.9158	DOWN
CECR6	-0.142078	8.00926	-6.59453	6.98164e-11	3.04819e-09	13.903	DOWN
PMPCB	0.104011	8.7593	6.5932	7.0418e-11	3.06444e-09	13.8946	NOT
CWF19L2	0.0939862	7.63031	6.57666	7.83374e-11	3.39801e-09	13.7907	NOT
STXBP2	-0.164629	10.6251	-6.569	8.22918e-11	3.55799e-09	13.7427	DOWN
GAA	-0.107205	7.76936	-6.55832	8.81386e-11	3.79849e-09	13.6758	DOWN
NUP107	0.0824262	7.9181	6.55346	9.09337e-11	3.90635e-09	13.6454	NOT
CAMTA2	-0.0497063	7.15055	-6.55101	9.23748e-11	3.95554e-09	13.6301	NOT
C14orf159	-0.114663	10.1972	-6.54976	9.31146e-11	3.96486e-09	13.6223	DOWN
MRPL3	0.11349	7.66219	6.54964	9.31861e-11	3.96486e-09	13.6216	UP
CD14	-0.181789	11.2881	-6.54825	9.40212e-11	3.97943e-09	13.6129	DOWN
PPWD1	0.099539	7.85813	6.54808	9.41242e-11	3.97943e-09	13.6118	NOT
ARPC3	0.147574	11.5743	6.54724	9.46356e-11	3.98843e-09	13.6065	UP
PSTPIP1	-0.117794	9.11148	-6.54562	9.56199e-11	4.01724e-09	13.5964	DOWN
PSMA6	0.20317	8.36145	6.54438	9.63858e-11	4.03672e-09	13.5887	UP
DISC1	-0.0948587	7.37835	-6.5436	9.68641e-11	4.04408e-09	13.5838	NOT
MYO9B	-0.125161	8.95003	-6.53375	1.03175e-10	4.29415e-09	13.5223	DOWN
SYTL3	-0.120188	8.77808	-6.53092	1.05061e-10	4.35903e-09	13.5047	DOWN
RIPK3	-0.0649989	8.08692	-6.52901	1.06347e-10	4.39876e-09	13.4928	NOT
TPST1	-0.155195	7.65713	-6.52176	1.11393e-10	4.58547e-09	13.4477	DOWN
LYPLAL1	0.0950808	7.97933	6.52155	1.11548e-10	4.58547e-09	13.4463	NOT
TCN2	-0.0703663	7.33795	-6.51605	1.15531e-10	4.73466e-09	13.4121	NOT
NADSYN1	-0.0782732	8.54399	-6.51089	1.194e-10	4.87824e-09	13.38	NOT
DGKQ	-0.127344	8.53426	-6.50652	1.22774e-10	5.00078e-09	13.3529	DOWN
TNFRSF1A	-0.136233	10.9755	-6.50272	1.25784e-10	5.10182e-09	13.3293	DOWN
PADI4	-0.212739	11.2263	-6.50218	1.26223e-10	5.10182e-09	13.3259	DOWN
CCT2	0.125903	8.53675	6.50163	1.26665e-10	5.10182e-09	13.3225	UP
EFHD2	-0.108906	12.364	-6.50148	1.26782e-10	5.10182e-09	13.3216	DOWN
SEMA4D	-0.114654	11.1349	-6.49879	1.28973e-10	5.17442e-09	13.3049	DOWN
RPL26	0.439143	8.914	6.49469	1.32387e-10	5.29548e-09	13.2794	UP
ARHGAP1	-0.122236	9.84897	-6.4938	1.33145e-10	5.30988e-09	13.2739	DOWN
ABHD4	-0.0794322	7.65556	-6.48835	1.37841e-10	5.48081e-09	13.2401	NOT
NCK1	0.120311	8.4501	6.4876	1.38498e-10	5.49059e-09	13.2355	UP
CXorf26	0.108786	8.01741	6.48542	1.40427e-10	5.5356e-09	13.222	UP
MYH9	-0.163801	11.8428	-6.48511	1.40711e-10	5.5356e-09	13.22	DOWN
TMUB2	-0.0842307	8.47332	-6.48492	1.40876e-10	5.5356e-09	13.2189	NOT
ZNF646	-0.066448	7.39226	-6.48407	1.4164e-10	5.54112e-09	13.2136	NOT
ATHL1	-0.210086	9.53404	-6.48384	1.41846e-10	5.54112e-09	13.2122	DOWN
HACL1	0.0825989	8.37832	6.47967	1.45661e-10	5.67355e-09	13.1863	NOT
METTL5	0.129404	7.6771	6.47917	1.46124e-10	5.67505e-09	13.1832	UP
C11orf10	0.0967199	11.2846	6.47861	1.46647e-10	5.67884e-09	13.1798	NOT
TMEM126B	0.190255	8.07815	6.47639	1.48725e-10	5.74267e-09	13.1661	UP
RHOG	-0.140661	12.5365	-6.46008	1.64936e-10	6.35028e-09	13.0653	DOWN
COPS4	0.111699	7.98643	6.44697	1.79212e-10	6.88008e-09	12.9844	UP
SIRT7	-0.0715564	7.89701	-6.44321	1.83528e-10	7.02561e-09	12.9613	NOT
SFRS17A	-0.0923526	8.62021	-6.43931	1.88108e-10	7.18036e-09	12.9373	NOT
G6PD	-0.159199	9.09427	-6.43693	1.90953e-10	7.26819e-09	12.9226	DOWN
CYBA	-0.0986765	12.8832	-6.43292	1.95857e-10	7.43366e-09	12.8979	NOT
IQSEC1	-0.110986	9.21655	-6.4265	2.03952e-10	7.71899e-09	12.8585	DOWN
SPTLC2	-0.070455	7.58962	-6.42022	2.12182e-10	8.00776e-09	12.82	NOT
TBC1D3G	-0.0683425	7.62661	-6.41687	2.16709e-10	8.15559e-09	12.7994	NOT
TMEM184B	-0.0981498	8.27964	-6.41201	2.23442e-10	8.38534e-09	12.7696	NOT
DDX50	0.0933103	7.68217	6.39719	2.45269e-10	9.17871e-09	12.6789	NOT
PSMC6	0.121876	7.5316	6.39153	2.54155e-10	9.48466e-09	12.6442	UP
PSD4	-0.120087	9.17005	-6.38979	2.56937e-10	9.56176e-09	12.6336	DOWN
CFP	-0.13049	9.07368	-6.37932	2.74374e-10	1.01823e-08	12.5697	DOWN
MYO1G	-0.120038	10.3953	-6.37465	2.82526e-10	1.04558e-08	12.5412	DOWN
TCIRG1	-0.0886099	7.70482	-6.36806	2.94428e-10	1.08662e-08	12.5011	NOT
TBC1D10C	-0.0999202	10.9109	-6.3663	2.97697e-10	1.09566e-08	12.4903	NOT
CIC	-0.0893077	7.93923	-6.36506	3.00004e-10	1.10111e-08	12.4828	NOT
VPS29	0.177562	9.27987	6.3616	3.0657e-10	1.12059e-08	12.4617	UP
TCTEX1D2	0.0851025	7.31594	6.36138	3.06989e-10	1.12059e-08	12.4604	NOT
KIAA1949	-0.113254	11.4733	-6.36025	3.0917e-10	1.12548e-08	12.4535	DOWN
CORO7	-0.119143	9.03399	-6.35923	3.11141e-10	1.12958e-08	12.4473	DOWN
C16orf7	-0.117409	8.42845	-6.35716	3.15197e-10	1.1412e-08	12.4347	DOWN
NXF1	-0.0899239	9.70895	-6.35312	3.2326e-10	1.16723e-08	12.4101	NOT
TM9SF1	-0.0797271	7.98286	-6.34294	3.44462e-10	1.24043e-08	12.3483	NOT
MTIF2	0.0792086	7.90964	6.33796	3.55305e-10	1.27604e-08	12.3181	NOT
RIN3	-0.100073	7.98836	-6.33396	3.64284e-10	1.30478e-08	12.2938	NOT
RAD9A	-0.0730105	7.61576	-6.32732	3.79659e-10	1.35621e-08	12.2536	NOT
ITGB2	-0.138974	13.5235	-6.3247	3.85892e-10	1.37481e-08	12.2378	DOWN
PGK1	-0.0886976	11.2282	-6.32371	3.88265e-10	1.37958e-08	12.2318	NOT
CRYZ	0.125875	7.59467	6.32242	3.91409e-10	1.38706e-08	12.224	UP
C16orf61	0.156505	8.52887	6.31999	3.97354e-10	1.4044e-08	12.2093	UP
C8orf40	0.104987	8.07277	6.31571	4.08065e-10	1.43846e-08	12.1834	NOT
PSMB7	0.102643	8.84182	6.31386	4.12796e-10	1.4513e-08	12.1722	NOT
C14orf166	0.149783	8.38886	6.30937	4.24452e-10	1.48837e-08	12.1451	UP
G6PC3	-0.0703691	7.61349	-6.30705	4.30618e-10	1.50604e-08	12.1311	NOT
NLRP6	-0.036307	7.04999	-6.30432	4.37975e-10	1.52777e-08	12.1146	NOT
KIF13B	-0.0667968	7.82575	-6.30008	4.49641e-10	1.56393e-08	12.089	NOT
NSMCE4A	0.130687	8.61696	6.2997	4.50685e-10	1.56393e-08	12.0867	UP
THOC7	0.115163	9.30215	6.29643	4.59935e-10	1.5919e-08	12.067	UP
COX7A2	0.216429	10.3693	6.29381	4.67461e-10	1.61377e-08	12.0512	UP
BCORL1	-0.0635807	7.39467	-6.28934	4.80553e-10	1.65365e-08	12.0243	NOT
UQCRH	0.0805392	7.34443	6.28884	4.82046e-10	1.65365e-08	12.0213	NOT
PGD	-0.162065	11.1399	-6.28861	4.82728e-10	1.65365e-08	12.0199	DOWN
CREBBP	-0.14241	9.55129	-6.28681	4.88156e-10	1.66797e-08	12.009	DOWN
APH1B	-0.104611	8.70891	-6.27954	5.10586e-10	1.74016e-08	11.9653	NOT
ZNF341	-0.0654972	7.69721	-6.27862	5.135e-10	1.74564e-08	11.9598	NOT
LTBR	-0.113592	8.9759	-6.26438	5.60708e-10	1.90128e-08	11.8742	DOWN
TXN	0.218452	9.85852	6.25993	5.76287e-10	1.94916e-08	11.8476	UP
RPL31	0.406131	9.86467	6.25459	5.95586e-10	2.00935e-08	11.8156	UP
ATG2A	-0.124802	8.43641	-6.25298	6.01519e-10	2.02425e-08	11.8059	DOWN
TLN1	-0.179256	9.44809	-6.24727	6.23038e-10	2.0914e-08	11.7717	DOWN
SF3B4	-0.119284	10.1505	-6.24327	6.38557e-10	2.13813e-08	11.7478	DOWN
PTAFR	-0.155712	9.29029	-6.23752	6.61536e-10	2.20953e-08	11.7134	DOWN
ATP6V0B	-0.105069	11.7211	-6.23012	6.92295e-10	2.30101e-08	11.6692	NOT
ADSL	0.0922424	9.47632	6.2301	6.92369e-10	2.30101e-08	11.6691	NOT
PCMT1	0.155344	9.60215	6.22832	6.99977e-10	2.32052e-08	11.6585	UP
PYCARD	-0.117206	10.0829	-6.21277	7.70004e-10	2.54635e-08	11.5658	DOWN
CTRL	-0.0569502	7.37684	-6.21231	7.72159e-10	2.54717e-08	11.5631	NOT
PSMA2	0.0936399	7.3334	6.20669	7.99178e-10	2.62981e-08	11.5296	NOT
ITGAL	-0.130133	9.54991	-6.20369	8.14002e-10	2.66835e-08	11.5117	DOWN
SSBP1	0.120482	9.31878	6.20351	8.14885e-10	2.66835e-08	11.5107	UP
WBP5	0.0343041	7.07107	6.20231	8.20868e-10	2.68137e-08	11.5036	NOT
ARHGAP27	-0.0759498	7.68711	-6.20136	8.25693e-10	2.69055e-08	11.4979	NOT
NDUFA4	0.298829	9.3303	6.19458	8.6059e-10	2.79744e-08	11.4576	UP
BCKDK	-0.111498	9.64757	-6.19281	8.69945e-10	2.82099e-08	11.4471	DOWN
SKIV2L	-0.0925381	8.76547	-6.19228	8.72763e-10	2.82327e-08	11.444	NOT
COIL	0.0682139	7.86894	6.18805	8.95595e-10	2.89013e-08	11.4189	NOT
GAPDH	-0.096911	11.6812	-6.18743	8.98983e-10	2.89408e-08	11.4152	NOT
ARHGAP24	-0.098632	7.5528	-6.1852	9.11334e-10	2.92678e-08	11.4019	NOT
C17orf62	-0.112605	10.2632	-6.18444	9.15558e-10	2.9333e-08	11.3974	DOWN
CRISPLD2	-0.221436	10.2611	-6.18225	9.2783e-10	2.9655e-08	11.3845	DOWN
TPT1	0.248328	11.2033	6.17908	9.45968e-10	3.01626e-08	11.3657	UP
POLE3	0.094572	9.83156	6.17758	9.54651e-10	3.0367e-08	11.3568	NOT
KLHDC8B	-0.136123	8.05164	-6.17692	9.58463e-10	3.04158e-08	11.3529	DOWN
NAGK	-0.122599	10.711	-6.17506	9.69425e-10	3.06908e-08	11.3419	DOWN
COX6A1	0.099777	9.21163	6.16942	1.00328e-09	3.16876e-08	11.3085	NOT
GTF2E2	0.0893331	9.20985	6.16842	1.00942e-09	3.18063e-08	11.3026	NOT
TFB2M	0.0863446	7.68008	6.16191	1.0502e-09	3.30133e-08	11.2641	NOT
ANKS1A	-0.0746626	8.27526	-6.15802	1.07528e-09	3.37224e-08	11.2411	NOT
ACADM	0.0863403	7.66182	6.1561	1.08789e-09	3.40378e-08	11.2298	NOT
FAM21A	-0.0823108	7.48061	-6.15471	1.09715e-09	3.42475e-08	11.2216	NOT
FAM100B	-0.0968147	8.59771	-6.15241	1.11254e-09	3.46468e-08	11.208	NOT
PDCL3	0.071939	7.82933	6.15003	1.12877e-09	3.50705e-08	11.194	NOT
SBNO2	-0.120624	8.45378	-6.14909	1.1352e-09	3.51884e-08	11.1884	DOWN
RIOK2	0.0991814	7.60515	6.14864	1.13833e-09	3.52039e-08	11.1858	NOT
FCGRT	-0.121282	11.316	-6.14815	1.14168e-09	3.52259e-08	11.1829	DOWN
DAPK2	-0.100424	7.80591	-6.1466	1.1525e-09	3.5478e-08	11.1737	NOT
FES	-0.152352	9.47434	-6.14476	1.1654e-09	3.57924e-08	11.1629	DOWN
DENND3	-0.127536	9.0215	-6.14259	1.18085e-09	3.61838e-08	11.1501	DOWN
FRG1	0.14024	8.16821	6.14202	1.18499e-09	3.62276e-08	11.1467	UP
WDR75	0.104311	8.23848	6.1396	1.20244e-09	3.66771e-08	11.1325	NOT
NUCB2	0.0894874	7.46	6.1301	1.27366e-09	3.87609e-08	11.0766	NOT
DPP3	-0.0616018	7.42161	-6.12271	1.33193e-09	4.04421e-08	11.0331	NOT
DHX16	-0.0743361	9.24989	-6.11481	1.39701e-09	4.2322e-08	10.9868	NOT
MAPK8IP3	-0.0604044	8.04755	-6.11291	1.41318e-09	4.2715e-08	10.9756	NOT
FANCG	-0.065095	7.52844	-6.10778	1.45753e-09	4.39563e-08	10.9456	NOT
PPP2R3C	0.128904	8.97486	6.09998	1.52779e-09	4.59713e-08	10.8998	UP
PILRA	-0.146739	9.91444	-6.09223	1.60075e-09	4.80585e-08	10.8545	DOWN
BNIP3	0.0859547	7.81269	6.09003	1.62208e-09	4.85897e-08	10.8417	NOT
MYO1F	-0.157951	9.33784	-6.08907	1.63151e-09	4.8763e-08	10.836	DOWN
DULLARD	-0.0933617	8.31977	-6.08771	1.64486e-09	4.88763e-08	10.8281	NOT
TMEM126A	0.132231	7.71624	6.0877	1.64495e-09	4.88763e-08	10.8281	UP
WBP4	0.0880851	7.58909	6.08757	1.64628e-09	4.88763e-08	10.8273	NOT
RPL32	0.0940829	10.2134	6.08538	1.66806e-09	4.9413e-08	10.8145	NOT
ANPEP	-0.194727	9.69779	-6.0815	1.70743e-09	5.04673e-08	10.7918	DOWN
HDDC2	0.137479	8.88263	6.07543	1.77084e-09	5.2226e-08	10.7564	UP
SHISA5	-0.11362	11.3537	-6.074	1.78612e-09	5.25608e-08	10.7481	DOWN
GPR108	-0.0858535	8.3258	-6.06844	1.84676e-09	5.42258e-08	10.7157	NOT
WAS	-0.135032	12.4657	-6.06692	1.86365e-09	5.46018e-08	10.7068	DOWN
SEC11A	0.139779	9.49272	6.06517	1.88327e-09	5.50558e-08	10.6966	UP
CFDP1	0.0804036	7.90623	6.06273	1.91106e-09	5.57461e-08	10.6824	NOT
ZCCHC17	0.0815844	8.16668	6.0617	1.92285e-09	5.5968e-08	10.6764	NOT
PSMD14	0.0776366	7.67152	6.0575	1.97192e-09	5.72713e-08	10.652	NOT
RPS14	0.122686	12.2146	6.05667	1.98169e-09	5.74303e-08	10.6472	UP
BTF3	0.139219	11.7303	6.0546	2.00641e-09	5.80209e-08	10.6351	UP
SRRM2	-0.12536	10.4008	-6.05379	2.01612e-09	5.81122e-08	10.6304	DOWN
TRIM25	-0.136995	9.33096	-6.0536	2.01843e-09	5.81122e-08	10.6293	DOWN
CEBPB	-0.126233	12.5187	-6.05326	2.02262e-09	5.81122e-08	10.6273	DOWN
SUPT6H	-0.0729504	7.61223	-6.05029	2.05889e-09	5.89422e-08	10.6101	NOT
LPPR2	-0.133748	8.71036	-6.05017	2.06033e-09	5.89422e-08	10.6094	DOWN
CAPNS1	-0.124344	10.413	-6.03655	2.23504e-09	6.38038e-08	10.5303	DOWN
GTF2A2	0.0755559	9.49976	6.02771	2.35614e-09	6.71172e-08	10.4791	NOT
PPP1R14B	-0.0765502	8.67932	-6.02676	2.36945e-09	6.73528e-08	10.4736	NOT
AOAH	-0.108352	8.83701	-6.02543	2.38838e-09	6.77469e-08	10.4659	DOWN
TATDN3	0.0659787	7.88023	6.01997	2.46734e-09	6.98382e-08	10.4343	NOT
ULK1	-0.0778916	8.74506	-6.01572	2.53057e-09	7.14766e-08	10.4098	NOT
FERMT3	-0.109667	10.4538	-6.01397	2.55715e-09	7.20749e-08	10.3996	DOWN
C10orf78	0.0404279	7.13611	6.00792	2.65082e-09	7.45577e-08	10.3647	NOT
HDHD2	0.0876458	7.99078	6.0056	2.68751e-09	7.54311e-08	10.3513	NOT
SUB1	0.138468	7.49965	6.00193	2.74685e-09	7.69348e-08	10.3301	UP
AKNA	-0.111916	10.6394	-6.00098	2.76236e-09	7.72074e-08	10.3247	DOWN
C9orf89	-0.0847841	8.62732	-5.99825	2.80756e-09	7.83068e-08	10.3089	NOT
RNH1	-0.0851542	8.04439	-5.99101	2.93078e-09	8.15734e-08	10.2672	NOT
MTF1	-0.121716	8.82197	-5.98953	2.95667e-09	8.21229e-08	10.2587	DOWN
EHD1	-0.126167	11.358	-5.98426	3.05046e-09	8.45521e-08	10.2284	DOWN
DDX23	-0.0749106	8.69575	-5.98167	3.09754e-09	8.56794e-08	10.2135	NOT
VAMP1	-0.0800059	8.07771	-5.97906	3.14584e-09	8.68355e-08	10.1985	NOT
AKAP13	-0.0742831	7.89941	-5.97578	3.20747e-09	8.83544e-08	10.1797	NOT
UPF1	-0.0982347	8.36258	-5.97442	3.23349e-09	8.88877e-08	10.1718	NOT
KPNA4	0.118451	9.11718	5.97135	3.29274e-09	9.00785e-08	10.1542	UP
CST3	-0.120845	12.9495	-5.97129	3.29396e-09	9.00785e-08	10.1538	DOWN
BRPF1	-0.0611828	7.7258	-5.97113	3.29703e-09	9.00785e-08	10.1529	NOT
GNB2	-0.0964883	8.31605	-5.96997	3.31963e-09	9.05107e-08	10.1463	NOT
C8orf59	0.168345	7.93693	5.96722	3.37412e-09	9.18091e-08	10.1305	UP
POU2F1	-0.0705042	7.56387	-5.96431	3.43267e-09	9.32123e-08	10.1138	NOT
RALA	0.107287	8.99391	5.96163	3.48735e-09	9.45051e-08	10.0985	UP
LSM7	0.132976	8.70721	5.96105	3.49934e-09	9.46379e-08	10.0952	UP
SNHG5	0.274812	9.82095	5.95999	3.52141e-09	9.50425e-08	10.089	UP
PSME1	-0.052124	7.33134	-5.95749	3.57371e-09	9.62597e-08	10.0747	NOT
FZD2	-0.0807957	7.53508	-5.9565	3.59463e-09	9.66282e-08	10.0691	NOT
FAM46A	-0.106107	10.067	-5.95537	3.61864e-09	9.70783e-08	10.0626	DOWN
CCDC58	0.0580017	7.09203	5.95463	3.63441e-09	9.71817e-08	10.0584	NOT
TMEM88	-0.0794362	7.43076	-5.95451	3.63704e-09	9.71817e-08	10.0577	NOT
ABCD1	-0.078159	7.42087	-5.95207	3.68975e-09	9.83934e-08	10.0437	NOT
ATP5I	0.115859	9.43048	5.95098	3.71354e-09	9.88305e-08	10.0375	UP
MOSC1	-0.158133	8.92008	-5.94817	3.77554e-09	1.00124e-07	10.0214	DOWN
PLEKHG3	-0.117639	8.83297	-5.9481	3.77713e-09	1.00124e-07	10.021	DOWN
NDUFB6	0.101737	9.01309	5.94229	3.9087e-09	1.03406e-07	9.9878	NOT
RAPGEFL1	-0.0629225	7.29991	-5.94033	3.95406e-09	1.044e-07	9.9766	NOT
REPS2	-0.134023	8.46844	-5.93841	3.99903e-09	1.05379e-07	9.96563	DOWN
METRNL	-0.0923104	8.32138	-5.93651	4.0439e-09	1.06351e-07	9.95481	NOT
SIGLEC9	-0.0625644	7.56905	-5.93617	4.05215e-09	1.06359e-07	9.95283	NOT
LSM14A	0.101445	9.53307	5.93538	4.07087e-09	1.06641e-07	9.94836	NOT
ANXA1	0.251306	10.7216	5.93318	4.12387e-09	1.07522e-07	9.93581	UP
NDUFB5	0.121964	9.85696	5.933	4.12819e-09	1.07522e-07	9.93479	UP
HINT1	0.303284	9.65242	5.93299	4.12866e-09	1.07522e-07	9.93468	UP
RNF31	-0.102054	8.7884	-5.93198	4.15311e-09	1.07949e-07	9.92895	NOT
ZNF770	0.0911968	7.6822	5.93165	4.1613e-09	1.07951e-07	9.92704	NOT
DNAJB11	0.0821535	9.1023	5.92815	4.24779e-09	1.09981e-07	9.90709	NOT
PGLYRP1	-0.246543	9.97029	-5.92624	4.29572e-09	1.11007e-07	9.8962	DOWN
IKBKG	-0.0894321	9.61942	-5.92356	4.36384e-09	1.1255e-07	9.88094	NOT
STK10	-0.101801	9.20271	-5.92225	4.39739e-09	1.13197e-07	9.87351	NOT
RAB11A	0.139662	9.17156	5.92037	4.44618e-09	1.14233e-07	9.8628	UP
GMFG	0.178546	10.5395	5.91765	4.51776e-09	1.15787e-07	9.84731	UP
ZNF513	-0.0466721	7.44573	-5.91742	4.52403e-09	1.15787e-07	9.84597	NOT
ZNF282	-0.0614278	7.61754	-5.91615	4.55768e-09	1.16398e-07	9.83878	NOT
IDUA	-0.0637812	7.50935	-5.91587	4.56532e-09	1.16398e-07	9.83715	NOT
TRIM27	-0.066969	7.91353	-5.9151	4.58604e-09	1.16704e-07	9.83276	NOT
PRIM1	0.0506865	7.53074	5.91461	4.59903e-09	1.16812e-07	9.83001	NOT
BIN3	-0.0874584	8.07489	-5.91412	4.61247e-09	1.16931e-07	9.82718	NOT
POR	-0.0858022	8.0821	-5.91142	4.68592e-09	1.18252e-07	9.81186	NOT
GPR18	0.104555	7.98245	5.91136	4.68767e-09	1.18252e-07	9.8115	NOT
CNBP	0.100153	8.50466	5.91123	4.69115e-09	1.18252e-07	9.81078	NOT
NSUN5	-0.0594492	7.6336	-5.90985	4.72939e-09	1.18992e-07	9.8029	NOT
TMEM115	-0.0664335	8.18506	-5.90692	4.81112e-09	1.20759e-07	9.78628	NOT
POLB	0.103148	8.93553	5.90669	4.8177e-09	1.20759e-07	9.78496	NOT
CHKB	-0.0458416	7.54286	-5.90553	4.85053e-09	1.21354e-07	9.77837	NOT
NDUFS3	0.0914373	9.39377	5.89747	5.08469e-09	1.26793e-07	9.73264	NOT
OBFC1	0.084183	8.3794	5.8974	5.0869e-09	1.26793e-07	9.73222	NOT
NSFL1C	-0.0918392	8.62742	-5.89647	5.11473e-09	1.27249e-07	9.72693	NOT
SLC44A2	-0.117169	11.0766	-5.89256	5.23279e-09	1.29944e-07	9.70479	DOWN
PDHB	0.0885592	10.053	5.89217	5.24489e-09	1.30003e-07	9.70256	NOT
RPP40	0.0457738	7.58675	5.8902	5.30544e-09	1.3126e-07	9.69142	NOT
ZYG11B	-0.129365	9.69336	-5.88798	5.37471e-09	1.32728e-07	9.67884	DOWN
LYRM2	0.101293	7.84363	5.88666	5.41636e-09	1.3351e-07	9.67136	NOT
SIPA1	-0.121367	10.3004	-5.88544	5.45516e-09	1.34219e-07	9.66443	DOWN
ZDHHC12	-0.0680141	8.11963	-5.88255	5.54798e-09	1.36252e-07	9.64807	NOT
MYB	0.0739992	7.5443	5.87921	5.65707e-09	1.38676e-07	9.62919	NOT
SLC9A1	-0.12145	9.03826	-5.87124	5.92637e-09	1.45012e-07	9.58409	DOWN
MRPL13	0.119933	7.51432	5.87018	5.96298e-09	1.4564e-07	9.57812	UP
VAMP7	0.121334	8.48705	5.86691	6.07774e-09	1.48173e-07	9.55963	UP
HTRA1	-0.033314	7.03587	-5.86573	6.11943e-09	1.48695e-07	9.55301	NOT
ARF3	-0.122045	9.04431	-5.86567	6.12144e-09	1.48695e-07	9.55269	DOWN
MAPK7	-0.0523606	7.41153	-5.86533	6.1339e-09	1.48728e-07	9.55072	NOT
GDI1	-0.0875191	8.62238	-5.86196	6.25529e-09	1.51168e-07	9.53171	NOT
NOL11	0.100046	8.2768	5.86191	6.25719e-09	1.51168e-07	9.53142	NOT
TRIM11	-0.0666546	8.02173	-5.85956	6.34329e-09	1.52972e-07	9.51817	NOT
RPA2	0.0960124	9.99384	5.85742	6.42257e-09	1.54605e-07	9.50613	NOT
IRAK1	-0.0793369	9.26415	-5.85391	6.55511e-09	1.57511e-07	9.48632	NOT
FBXO8	0.0635153	7.73764	5.85185	6.63374e-09	1.59114e-07	9.47476	NOT
CD79B	0.175361	8.47442	5.85071	6.67815e-09	1.59893e-07	9.46829	UP
GTF3C1	-0.0792047	7.7263	-5.84914	6.7392e-09	1.61066e-07	9.45947	NOT
CLC	0.307136	10.3831	5.84672	6.83438e-09	1.63049e-07	9.44587	UP
REC8	-0.0918695	7.97127	-5.84494	6.90557e-09	1.64454e-07	9.43583	NOT
RELB	-0.0826007	7.89192	-5.84356	6.96091e-09	1.65245e-07	9.42809	NOT
TMEM120A	-0.102675	8.547	-5.84332	6.9709e-09	1.65245e-07	9.4267	NOT
HS1BP3	-0.0825898	8.01329	-5.84319	6.97592e-09	1.65245e-07	9.426	NOT
INTS12	0.0524481	8.37185	5.84215	7.01822e-09	1.65953e-07	9.42014	NOT
KCNMB1	-0.0686782	7.74174	-5.83884	7.15431e-09	1.68872e-07	9.40152	NOT
RNF24	-0.181532	10.3341	-5.83847	7.16955e-09	1.68933e-07	9.39946	DOWN
RPL27	0.21936	11.8812	5.83708	7.22773e-09	1.70004e-07	9.39162	UP
NAP1L4	0.0772623	10.2946	5.83654	7.25013e-09	1.70232e-07	9.38863	NOT
MYST3	-0.135174	10.2855	-5.83068	7.50085e-09	1.75809e-07	9.35567	DOWN
SLC7A7	-0.115358	10.7586	-5.82719	7.65375e-09	1.79079e-07	9.33611	DOWN
IMPDH1	-0.111331	9.1071	-5.82659	7.68044e-09	1.79389e-07	9.33274	DOWN
SEC24C	-0.0836337	9.82681	-5.82495	7.75358e-09	1.80782e-07	9.32355	NOT
COMMD8	0.153591	7.70675	5.81606	8.16281e-09	1.89992e-07	9.2737	UP
RBM42	-0.0967421	8.8224	-5.81568	8.18042e-09	1.9007e-07	9.27161	NOT
FLII	-0.102723	8.59398	-5.81502	8.21156e-09	1.90463e-07	9.26792	NOT
SLC30A9	0.108808	7.98132	5.81279	8.31835e-09	1.92605e-07	9.2554	UP
ASNSD1	0.161322	8.44797	5.80991	8.45772e-09	1.95493e-07	9.2393	UP
MFSD10	-0.0923959	10.3425	-5.80949	8.47837e-09	1.95632e-07	9.23694	NOT
MRPL24	0.0830365	8.70293	5.80906	8.49939e-09	1.95779e-07	9.23454	NOT
UQCRC1	-0.101683	9.48035	-5.80655	8.6236e-09	1.98298e-07	9.22048	NOT
TAPBP	-0.0870103	9.27162	-5.80403	8.74954e-09	2.00849e-07	9.20642	NOT
ABCC10	-0.0435289	7.31141	-5.80299	8.80226e-09	2.01712e-07	9.2006	NOT
DBN1	-0.0804156	7.6022	-5.80194	8.85588e-09	2.02593e-07	9.19472	NOT
BOLA2	-0.0805589	7.62754	-5.80114	8.89663e-09	2.03178e-07	9.19027	NOT
CKS2	0.0732944	7.31153	5.79969	8.9712e-09	2.04531e-07	9.18218	NOT
ILF2	0.0816413	9.54385	5.79785	9.0668e-09	2.06252e-07	9.17191	NOT
MON1B	-0.0694356	7.6787	-5.79765	9.07758e-09	2.06252e-07	9.17076	NOT
IL1R2	-0.0895364	7.55702	-5.78796	9.59827e-09	2.17713e-07	9.11671	NOT
TACC3	-0.119692	8.73673	-5.78275	9.89032e-09	2.23769e-07	9.08767	DOWN
UBTD1	-0.0945566	7.94128	-5.7826	9.89877e-09	2.23769e-07	9.08684	NOT
GALK1	-0.0897149	9.81018	-5.77843	1.01387e-08	2.28806e-07	9.06363	NOT
TMEM59	0.117847	10.2206	5.77628	1.02652e-08	2.3127e-07	9.05162	UP
STX5	-0.0711159	8.86446	-5.76608	1.08839e-08	2.44797e-07	8.99492	NOT
ZZEF1	-0.0704152	8.40569	-5.76553	1.09182e-08	2.45155e-07	8.99187	NOT
GRN	-0.16238	10.2341	-5.76211	1.11342e-08	2.49585e-07	8.9729	DOWN
RPS29	0.170613	10.7446	5.7597	1.12894e-08	2.5264e-07	8.95949	UP
SEPN1	-0.0936418	8.26505	-5.75606	1.15266e-08	2.57517e-07	8.93934	NOT
SEC61G	0.111114	10.0863	5.75419	1.16511e-08	2.59865e-07	8.92893	UP
CCND3	-0.0981046	12.2031	-5.7487	1.20225e-08	2.677e-07	8.89854	NOT
TMSB10	0.108182	13.1938	5.74429	1.233e-08	2.7409e-07	8.87408	UP
PSMD10	0.111453	8.25767	5.74395	1.2354e-08	2.74168e-07	8.87219	UP
CTSD	-0.139677	9.50534	-5.73523	1.29846e-08	2.87685e-07	8.82398	DOWN
RNF14	0.10636	8.15287	5.73321	1.3135e-08	2.90536e-07	8.81282	UP
PPP1R2	0.133637	8.51312	5.7313	1.32792e-08	2.9324e-07	8.80225	UP
PRIC285	-0.147412	9.68331	-5.72996	1.33808e-08	2.94997e-07	8.79486	DOWN
SLC16A3	-0.124629	11.0573	-5.72789	1.35396e-08	2.98005e-07	8.78344	DOWN
POLE4	0.127982	9.72536	5.72585	1.3698e-08	3.00996e-07	8.77217	UP
TTYH3	-0.0814877	8.0218	-5.72131	1.40572e-08	3.08382e-07	8.74711	NOT
DENND1C	-0.0993145	8.35696	-5.71952	1.42007e-08	3.11019e-07	8.73727	NOT
RGS10	0.148571	9.7263	5.71512	1.45611e-08	3.18391e-07	8.713	UP
CRIPT	0.085951	8.11464	5.71095	1.49108e-08	3.25504e-07	8.69002	NOT
PKM2	-0.110801	7.86481	-5.70703	1.52464e-08	3.32287e-07	8.66847	DOWN
SSH3	-0.0871001	8.07222	-5.70657	1.52862e-08	3.32611e-07	8.66595	NOT
LPP	-0.0803168	9.27417	-5.70493	1.54296e-08	3.35187e-07	8.6569	NOT
RPL39	0.285681	11.6225	5.70325	1.55773e-08	3.37595e-07	8.64768	UP
DCP1A	-0.0760664	8.21153	-5.7031	1.5591e-08	3.37595e-07	8.64683	NOT
PIK3CD	-0.120872	10.0367	-5.70009	1.58596e-08	3.42855e-07	8.63029	DOWN
PTOV1	-0.0884554	9.56356	-5.69377	1.64386e-08	3.54797e-07	8.59558	NOT
RAB3IP	0.0681251	7.86264	5.69337	1.64757e-08	3.54823e-07	8.5934	NOT
CHRNA10	-0.0458307	7.25616	-5.69319	1.64929e-08	3.54823e-07	8.59239	NOT
APIP	0.0871465	7.62905	5.69274	1.65349e-08	3.55155e-07	8.58992	NOT
DEK	0.178916	8.25418	5.69075	1.67223e-08	3.58604e-07	8.57901	UP
EIF3M	0.125994	8.87831	5.68761	1.70227e-08	3.6446e-07	8.56178	UP
SH3BP5L	-0.0914264	8.44148	-5.68434	1.73407e-08	3.70676e-07	8.54386	NOT
SNORD33	0.0504557	7.17704	5.68255	1.75178e-08	3.73863e-07	8.53402	NOT
EXOSC1	0.0769795	8.56307	5.68167	1.76053e-08	3.75131e-07	8.5292	NOT
MGAT1	-0.100921	10.4467	-5.68136	1.76358e-08	3.75182e-07	8.52752	NOT
EXTL3	-0.10627	8.41044	-5.68032	1.77399e-08	3.76269e-07	8.52183	DOWN
SMARCD3	-0.0685775	7.50972	-5.68029	1.77432e-08	3.76269e-07	8.52165	NOT
STAT5A	-0.107239	9.87864	-5.67822	1.79527e-08	3.79525e-07	8.51029	DOWN
SNRPA1	0.0883039	9.24403	5.67821	1.79536e-08	3.79525e-07	8.51024	NOT
FOXO1	0.0951016	8.49694	5.67614	1.8165e-08	3.83387e-07	8.49891	NOT
NISCH	-0.0786334	8.89699	-5.67509	1.82727e-08	3.85053e-07	8.49318	NOT
FPR1	-0.157843	12.7351	-5.67387	1.83998e-08	3.87121e-07	8.48647	DOWN
KIAA0195	-0.0621782	7.49516	-5.66682	1.9147e-08	4.02207e-07	8.44795	NOT
DGAT1	-0.0776709	8.12729	-5.6654	1.93011e-08	4.04807e-07	8.44019	NOT
NLRP12	-0.144561	10.3568	-5.66428	1.94233e-08	4.06733e-07	8.43407	DOWN
CALCOCO1	-0.068576	8.0412	-5.66114	1.97713e-08	4.13372e-07	8.41689	NOT
BSDC1	-0.0750115	9.42236	-5.65875	2.00397e-08	4.18152e-07	8.40384	NOT
ACTR6	0.134609	7.4834	5.65855	2.00625e-08	4.18152e-07	8.40274	UP
SDCCAG1	0.0684319	7.92315	5.65795	2.01298e-08	4.189e-07	8.3995	NOT
SLCO3A1	-0.0953787	8.71201	-5.65518	2.04463e-08	4.24826e-07	8.3844	NOT
MTX1	-0.0876053	8.45757	-5.65297	2.07033e-08	4.29496e-07	8.37231	NOT
STRN4	-0.0578365	7.55037	-5.65222	2.07908e-08	4.30644e-07	8.36823	NOT
IAH1	0.099945	8.21722	5.65107	2.09256e-08	4.32764e-07	8.36198	NOT
CSF3R	-0.163514	9.83351	-5.64898	2.11743e-08	4.37231e-07	8.35054	DOWN
FBL	0.112026	9.5211	5.64467	2.16937e-08	4.47265e-07	8.32709	UP
PRAM1	-0.13496	8.98226	-5.64223	2.19935e-08	4.52747e-07	8.31381	DOWN
TBC1D14	-0.0944238	9.59962	-5.64141	2.20951e-08	4.5414e-07	8.30935	NOT
CBARA1	-0.0814237	8.18848	-5.64067	2.21878e-08	4.55344e-07	8.3053	NOT
EEF1A1	0.0931545	14.0831	5.63742	2.25966e-08	4.63023e-07	8.28763	NOT
INPP4B	0.064199	7.48578	5.63711	2.26362e-08	4.63123e-07	8.28594	NOT
SEMA4A	-0.165011	9.5353	-5.63615	2.27586e-08	4.64916e-07	8.28072	DOWN
LOC642103	-0.162606	8.61068	-5.63428	2.29989e-08	4.69107e-07	8.27056	DOWN
PRPF18	0.0524882	7.15224	5.63389	2.30501e-08	4.69436e-07	8.2684	NOT
ICOS	0.0995048	7.76311	5.6311	2.34142e-08	4.75852e-07	8.25324	NOT
VPS4A	-0.0578241	7.76716	-5.63093	2.34364e-08	4.75852e-07	8.25232	NOT
SLC27A1	-0.077872	7.90944	-5.62793	2.38337e-08	4.83183e-07	8.23606	NOT
SAFB2	-0.0826405	9.28117	-5.62707	2.39489e-08	4.84784e-07	8.2314	NOT
APEX2	-0.0588895	8.18404	-5.62472	2.4267e-08	4.9048e-07	8.21863	NOT
ZNF26	0.0639409	7.53779	5.62438	2.43136e-08	4.9068e-07	8.21677	NOT
VPS37B	-0.107746	9.15767	-5.62401	2.43639e-08	4.90952e-07	8.21477	DOWN
RABGGTB	0.0819216	7.71726	5.62201	2.46392e-08	4.95753e-07	8.2039	NOT
TP53I11	-0.0746871	7.46768	-5.62097	2.47825e-08	4.97887e-07	8.19829	NOT
GATS	-0.0881306	8.41983	-5.61699	2.53427e-08	5.08376e-07	8.17667	NOT
MMP9	-0.284976	10.6465	-5.616	2.5483e-08	5.09934e-07	8.17133	DOWN
SHKBP1	-0.15065	8.97956	-5.61591	2.54967e-08	5.09934e-07	8.17081	DOWN
DTX2	-0.0578212	7.49051	-5.61511	2.56105e-08	5.11444e-07	8.1665	NOT
STAT6	-0.122959	9.54526	-5.61324	2.58797e-08	5.15889e-07	8.15638	DOWN
EAF2	0.0551675	7.10837	5.61303	2.59103e-08	5.15889e-07	8.15524	NOT
TLE3	-0.111485	7.93859	-5.60864	2.65557e-08	5.27953e-07	8.13144	DOWN
VPS33B	-0.0599223	7.95936	-5.60617	2.69254e-08	5.34507e-07	8.11807	NOT
BTLA	0.0935745	7.44847	5.60339	2.73475e-08	5.42082e-07	8.10302	NOT
GIYD2	-0.0565774	7.40103	-5.60294	2.74153e-08	5.4262e-07	8.10062	NOT
CCDC14	0.113818	8.06632	5.60145	2.76453e-08	5.46362e-07	8.09254	UP
NAGPA	-0.0751931	8.39647	-5.5946	2.87232e-08	5.66489e-07	8.05555	NOT
XPO6	-0.135496	10.8622	-5.59444	2.87485e-08	5.66489e-07	8.0547	DOWN
RPL3	0.137819	11.9574	5.59226	2.91018e-08	5.72606e-07	8.04288	UP
FMNL1	-0.0885992	7.80147	-5.59181	2.91736e-08	5.73175e-07	8.0405	NOT
WDR61	0.0880835	8.44696	5.59126	2.92645e-08	5.73404e-07	8.03749	NOT
ZC3H3	-0.0886141	8.76999	-5.59122	2.92711e-08	5.73404e-07	8.03727	NOT
DYNLT3	0.101642	7.52449	5.58641	3.00661e-08	5.88115e-07	8.01135	NOT
C7orf53	-0.0726409	7.51364	-5.58404	3.0466e-08	5.95066e-07	7.99858	NOT
PCBP1	-0.0922352	12.1833	-5.58364	3.05353e-08	5.9555e-07	7.99638	NOT
CD53	-0.0750211	10.0847	-5.58133	3.09294e-08	6.02357e-07	7.98397	NOT
P4HB	-0.085213	10.1239	-5.57516	3.20115e-08	6.22523e-07	7.95072	NOT
PRDX4	0.0936135	8.27103	5.57286	3.24243e-08	6.29635e-07	7.93833	NOT
TTC15	-0.0723881	8.94589	-5.57098	3.27651e-08	6.3533e-07	7.92822	NOT
TSPAN13	0.0878391	7.40477	5.57056	3.28414e-08	6.35849e-07	7.92597	NOT
PFKFB4	-0.128022	10.2588	-5.57031	3.28871e-08	6.35849e-07	7.92462	DOWN
SIN3B	-0.0592792	7.7105	-5.56683	3.35302e-08	6.47345e-07	7.9059	NOT
EMILIN2	-0.11519	9.27461	-5.56325	3.42029e-08	6.59381e-07	7.88669	DOWN
ZNF701	0.0539632	7.25915	5.56105	3.46236e-08	6.66529e-07	7.87487	NOT
C19orf39	-0.0636937	7.48825	-5.56028	3.47728e-08	6.68408e-07	7.87071	NOT
SH3BGRL3	-0.120337	12.1699	-5.56003	3.48212e-08	6.68408e-07	7.86937	DOWN
CLNS1A	0.134576	8.8904	5.55754	3.53061e-08	6.76742e-07	7.856	UP
USO1	0.111096	8.26498	5.55576	3.56558e-08	6.82466e-07	7.84647	UP
EIF4A2	0.160104	10.9853	5.55217	3.63744e-08	6.95225e-07	7.82718	UP
EFTUD2	-0.0892319	8.78162	-5.55066	3.66797e-08	7.00058e-07	7.8191	NOT
DPP9	-0.0811526	8.3836	-5.54938	3.69404e-08	7.04028e-07	7.81225	NOT
DIMT1L	0.0859618	8.3694	5.5461	3.76191e-08	7.15942e-07	7.79465	NOT
LOC643997	0.0997724	7.50374	5.54185	3.85147e-08	7.31943e-07	7.7719	NOT
GHDC	-0.0769693	8.19989	-5.53969	3.89781e-08	7.39699e-07	7.76034	NOT
POLR1E	0.0676666	7.79104	5.5352	3.99594e-08	7.57244e-07	7.73631	NOT
CHD2	0.0373998	7.24416	5.53363	4.03073e-08	7.62756e-07	7.72793	NOT
PISD	-0.115245	9.46789	-5.53225	4.06162e-08	7.67515e-07	7.72055	DOWN
CLASP1	-0.0546668	8.10315	-5.53135	4.08181e-08	7.7024e-07	7.71576	NOT
CCDC15	0.054477	7.2465	5.53108	4.0879e-08	7.70301e-07	7.71431	NOT
CLPTM1	-0.0998217	8.92197	-5.52805	4.15697e-08	7.82213e-07	7.69812	NOT
PPP1R12C	-0.0461129	7.31254	-5.52741	4.17176e-08	7.83892e-07	7.69469	NOT
HCK	-0.112921	10.7615	-5.52601	4.20412e-08	7.88863e-07	7.68722	DOWN
GPSM3	-0.108466	11.6779	-5.52444	4.24066e-08	7.94603e-07	7.67885	DOWN
JUND	-0.0973459	12.7699	-5.52001	4.34564e-08	8.13133e-07	7.65522	NOT
CD3G	0.143563	8.33594	5.51842	4.38388e-08	8.19142e-07	7.64675	UP
TAF1C	-0.100789	9.27552	-5.51798	4.39455e-08	8.19988e-07	7.6444	NOT
LCOR	-0.126595	8.25563	-5.51743	4.40788e-08	8.21328e-07	7.64148	DOWN
TRIM21	-0.10902	9.24209	-5.5104	4.58218e-08	8.52617e-07	7.604	DOWN
APLP2	-0.0740214	7.89399	-5.50832	4.63497e-08	8.61241e-07	7.59293	NOT
RRP12	-0.113077	8.25407	-5.50663	4.67829e-08	8.68083e-07	7.58394	DOWN
AHCYL2	-0.0525888	7.50617	-5.50581	4.69942e-08	8.70793e-07	7.57958	NOT
RBM34	0.107139	7.76059	5.50494	4.72207e-08	8.73779e-07	7.57494	UP
DHRS7B	-0.0508607	7.6554	-5.50192	4.80108e-08	8.8717e-07	7.5589	NOT
SH3BP1	-0.112661	8.66998	-5.4982	4.90034e-08	9.04261e-07	7.53913	DOWN
VBP1	0.133445	8.14439	5.49736	4.9232e-08	9.07226e-07	7.53463	UP
INTS3	-0.0900612	8.87215	-5.49419	5.00953e-08	9.19767e-07	7.51783	NOT
FXR1	0.0743856	7.9848	5.49408	5.01266e-08	9.19767e-07	7.51723	NOT
SPI1	-0.155168	11.224	-5.49401	5.01455e-08	9.19767e-07	7.51686	DOWN
GLA	-0.0841057	9.20868	-5.49386	5.01879e-08	9.19767e-07	7.51605	NOT
VRK1	0.0566934	7.27296	5.49322	5.03641e-08	9.21731e-07	7.51266	NOT
ACTN1	-0.165569	10.8239	-5.49295	5.04386e-08	9.21817e-07	7.51123	DOWN
MRPL48	0.0719829	7.21655	5.49256	5.0547e-08	9.21817e-07	7.50916	NOT
SNRPF	0.11014	8.91522	5.49246	5.05757e-08	9.21817e-07	7.50861	UP
MTMR14	-0.0717665	8.92174	-5.49201	5.07012e-08	9.22845e-07	7.50622	NOT
SCAP	-0.116805	9.96285	-5.49063	5.10851e-08	9.28567e-07	7.49893	DOWN
C19orf35	-0.0779837	7.32121	-5.49031	5.11754e-08	9.28944e-07	7.49722	NOT
DIDO1	-0.0488206	7.51512	-5.48941	5.14297e-08	9.32294e-07	7.49243	NOT
ENG	-0.0619749	7.36021	-5.489	5.15461e-08	9.33138e-07	7.49025	NOT
MCEE	0.0985454	7.73979	5.48457	5.28127e-08	9.54774e-07	7.46679	NOT
ZNF787	-0.0957051	8.85382	-5.4832	5.3213e-08	9.60711e-07	7.4595	NOT
HMGCS1	0.0851595	7.67712	5.482	5.35632e-08	9.65729e-07	7.45316	NOT
SENP6	0.0837937	7.81621	5.47761	5.4868e-08	9.87919e-07	7.42991	NOT
AGPAT1	-0.0869633	8.06473	-5.47544	5.55241e-08	9.98388e-07	7.41843	NOT
PPIH	0.0667673	8.30506	5.47397	5.59738e-08	1.00512e-06	7.41064	NOT
CASZ1	-0.0682121	7.86913	-5.47097	5.69005e-08	1.02039e-06	7.39477	NOT
TRAT1	0.0795753	7.3286	5.4685	5.76751e-08	1.03245e-06	7.38171	NOT
MXD3	-0.0677814	7.65306	-5.46834	5.77274e-08	1.03245e-06	7.38084	NOT
CMTM2	0.183831	10.6146	5.46577	5.85446e-08	1.04428e-06	7.36726	UP
PSME3	-0.068492	8.56872	-5.46576	5.85453e-08	1.04428e-06	7.36725	NOT
OSBPL5	-0.102205	8.13534	-5.46255	5.9582e-08	1.06135e-06	7.35029	NOT
TNS3	-0.0809333	7.96784	-5.46164	5.98819e-08	1.06528e-06	7.34544	NOT
MIS12	0.105796	8.28545	5.4611	6.00591e-08	1.06701e-06	7.34259	NOT
PGM1	-0.0824156	9.55092	-5.46084	6.01442e-08	1.0671e-06	7.34122	NOT
PRPS1	0.0776557	8.51102	5.45943	6.06097e-08	1.07393e-06	7.33377	NOT
SUCLG1	0.0659857	8.96219	5.45646	6.15982e-08	1.09e-06	7.31815	NOT
COBLL1	0.0879442	7.44517	5.44864	6.42854e-08	1.13605e-06	7.27691	NOT
PARVG	-0.0837126	10.3003	-5.446	6.52197e-08	1.15104e-06	7.26297	NOT
MED28	0.0918825	8.67548	5.44402	6.59271e-08	1.16169e-06	7.25256	NOT
TPRKB	0.0394522	7.1446	5.44382	6.59972e-08	1.16169e-06	7.25153	NOT
PPP1R10	-0.0662046	8.00345	-5.44267	6.64127e-08	1.16641e-06	7.24547	NOT
WDR8	-0.0516847	8.61603	-5.4426	6.64399e-08	1.16641e-06	7.24507	NOT
PHC2	-0.0935424	7.98853	-5.44106	6.69967e-08	1.1735e-06	7.23701	NOT
KIAA0528	0.137781	8.49727	5.441	6.70195e-08	1.1735e-06	7.23668	UP
DAPK3	-0.0463932	7.35604	-5.44033	6.72639e-08	1.17624e-06	7.23317	NOT
MVP	-0.104171	9.50036	-5.4378	6.81987e-08	1.19103e-06	7.21984	NOT
MCM7	-0.0546623	8.11776	-5.43619	6.87992e-08	1.19994e-06	7.21138	NOT
C12orf62	0.0739922	7.50628	5.43356	6.97898e-08	1.21564e-06	7.19757	NOT
CKLF	0.148042	11.2152	5.43181	7.04572e-08	1.22566e-06	7.18838	UP
MRPL40	0.0374952	7.0777	5.42895	7.15632e-08	1.24328e-06	7.17334	NOT
MNT	-0.084759	8.75984	-5.42666	7.24602e-08	1.25723e-06	7.16131	NOT
MSH6	0.0679778	8.07838	5.42399	7.35207e-08	1.27321e-06	7.14729	NOT
RPL21	0.313915	10.0362	5.42386	7.35718e-08	1.27321e-06	7.14662	UP
RWDD3	0.0332844	7.08911	5.4232	7.38351e-08	1.27612e-06	7.14317	NOT
TMEM91	-0.134923	10.0446	-5.42265	7.40558e-08	1.27828e-06	7.14028	DOWN
NLRC5	-0.0730133	7.88857	-5.41305	7.80156e-08	1.34489e-06	7.08999	NOT
ZNF264	0.0562365	7.47248	5.41022	7.92257e-08	1.36399e-06	7.07514	NOT
PWP1	0.0781181	8.52779	5.40979	7.94087e-08	1.36538e-06	7.07291	NOT
TPCN2	-0.0674186	7.8273	-5.40443	8.17468e-08	1.40378e-06	7.0449	NOT
RARA	-0.1177	10.4393	-5.40358	8.21269e-08	1.40849e-06	7.04042	DOWN
RPS10	0.135803	12.6438	5.40303	8.23703e-08	1.41085e-06	7.03756	UP
SASH3	-0.0748407	9.98795	-5.39996	8.37502e-08	1.43265e-06	7.02152	NOT
ATPAF1	0.0600669	8.07621	5.39869	8.433e-08	1.44073e-06	7.01486	NOT
WDR81	-0.0697254	7.8954	-5.39559	8.57542e-08	1.46319e-06	6.9987	NOT
CAP1	-0.0836864	12.8315	-5.39009	8.83429e-08	1.50544e-06	6.96999	NOT
RDH14	0.0630257	7.44861	5.38788	8.94054e-08	1.5203e-06	6.95846	NOT
HSPA14	0.0768539	7.56057	5.3878	8.94427e-08	1.5203e-06	6.95805	NOT
RPS13	0.115043	11.9799	5.38612	9.02562e-08	1.53218e-06	6.94931	UP
IDS	-0.09581	9.18174	-5.38294	9.18185e-08	1.55672e-06	6.93275	NOT
TMUB1	-0.0747419	8.74003	-5.38048	9.30478e-08	1.57556e-06	6.91992	NOT
LONP1	-0.0616233	7.87408	-5.37839	9.41029e-08	1.59141e-06	6.90904	NOT
ZNF439	0.0693767	7.35069	5.3765	9.50685e-08	1.60571e-06	6.89918	NOT
SPAG7	0.0702796	7.95499	5.3757	9.54776e-08	1.61058e-06	6.89504	NOT
OSBPL7	-0.0560505	7.61658	-5.37237	9.72071e-08	1.63769e-06	6.87772	NOT
CIDEB	-0.0788719	8.33807	-5.37095	9.79508e-08	1.64814e-06	6.87036	NOT
LILRB3	-0.136467	12.0284	-5.36984	9.85397e-08	1.65596e-06	6.86458	DOWN
RPL24	0.184987	11.6873	5.36808	9.94771e-08	1.66962e-06	6.85544	UP
ATP1B3	-0.0706205	7.77015	-5.36764	9.97117e-08	1.67145e-06	6.85317	NOT
NME1-NME2	0.103506	9.75657	5.36738	9.98531e-08	1.67173e-06	6.8518	NOT
PIGS	-0.0590205	8.03492	-5.367	1.00056e-07	1.67233e-06	6.84984	NOT
C5AR1	-0.148841	10.8621	-5.36685	1.0014e-07	1.67233e-06	6.84904	DOWN
WDR91	-0.0418686	7.45259	-5.36601	1.00593e-07	1.6778e-06	6.84468	NOT
RRP15	0.055671	7.26011	5.36341	1.02012e-07	1.69934e-06	6.83117	NOT
S100A8	0.244067	12.6019	5.36159	1.03012e-07	1.71387e-06	6.82175	UP
DYNC1H1	-0.0816401	8.43375	-5.35818	1.04918e-07	1.74342e-06	6.80406	NOT
C14orf4	-0.150768	9.46005	-5.35741	1.05352e-07	1.74681e-06	6.80008	DOWN
TSEN34	-0.114758	10.2972	-5.35736	1.05384e-07	1.74681e-06	6.79979	DOWN
IRF9	-0.108671	11.2525	-5.35393	1.07342e-07	1.77706e-06	6.78203	DOWN
TOMM20	0.0991904	8.2807	5.35122	1.08915e-07	1.80087e-06	6.76799	NOT
TBC1D2B	-0.0670375	9.0209	-5.34998	1.09644e-07	1.81068e-06	6.76155	NOT
MYBPC3	-0.079406	7.73179	-5.34655	1.11681e-07	1.84205e-06	6.74379	NOT
TCHP	-0.0425086	7.49727	-5.34486	1.12697e-07	1.85651e-06	6.73506	NOT
DYRK1B	-0.0575257	7.50461	-5.3434	1.13582e-07	1.86879e-06	6.72751	NOT
HLA-B	-0.0904743	13.3505	-5.34296	1.13854e-07	1.87095e-06	6.72521	NOT
DLG4	-0.0589677	7.36159	-5.34202	1.14428e-07	1.87809e-06	6.72035	NOT
FAM107B	0.102402	9.71237	5.34116	1.14955e-07	1.88442e-06	6.71592	NOT
NRBP2	-0.0546308	7.75029	-5.34027	1.15505e-07	1.89111e-06	6.71132	NOT
CST7	-0.157987	10.2792	-5.33927	1.16123e-07	1.8989e-06	6.70617	DOWN
PNKP	-0.0787391	8.81912	-5.33683	1.17653e-07	1.92157e-06	6.69355	NOT
CAMLG	0.0879236	10.0952	5.33604	1.18154e-07	1.92739e-06	6.68945	NOT
VCAN	-0.178389	10.3166	-5.33532	1.18607e-07	1.93102e-06	6.68575	DOWN
LAMP1	-0.108939	10.8482	-5.33509	1.18757e-07	1.93102e-06	6.68454	DOWN
ZNF22	0.12077	8.23333	5.335	1.1881e-07	1.93102e-06	6.68411	UP
CHMP1A	-0.0816659	9.06281	-5.33429	1.19266e-07	1.93608e-06	6.68041	NOT
TSC22D3	-0.0956158	10.7549	-5.33277	1.20239e-07	1.9495e-06	6.67258	NOT
REXO1	-0.0633554	7.85263	-5.33177	1.20887e-07	1.95764e-06	6.66739	NOT
RNF44	-0.0759398	8.92812	-5.3309	1.21446e-07	1.96431e-06	6.66294	NOT
ALG5	0.0798466	7.72684	5.32704	1.23985e-07	2.00295e-06	6.64298	NOT
CKAP4	-0.13063	9.86124	-5.32628	1.24489e-07	2.00866e-06	6.63907	DOWN
DPH3	0.065356	7.68109	5.32434	1.25788e-07	2.02717e-06	6.62906	NOT
COPS3	0.076953	9.59205	5.32315	1.26587e-07	2.0376e-06	6.62295	NOT
RPS6	0.16982	12.0211	5.32216	1.2726e-07	2.04597e-06	6.61784	UP
NLRX1	-0.0612433	7.59164	-5.3215	1.27707e-07	2.05067e-06	6.61446	NOT
ZNF277	0.0952925	8.01953	5.32047	1.28416e-07	2.05958e-06	6.60912	NOT
GSS	-0.0581237	7.71279	-5.32003	1.28714e-07	2.0619e-06	6.60688	NOT
GPR172A	-0.0584443	7.89445	-5.31964	1.28983e-07	2.06372e-06	6.60487	NOT
MTERFD1	0.0673533	7.69441	5.31905	1.29393e-07	2.06781e-06	6.60181	NOT
SDAD1	0.0973907	9.33903	5.31813	1.3003e-07	2.07551e-06	6.59707	NOT
FCN1	-0.109704	13.2012	-5.31785	1.30219e-07	2.07605e-06	6.59567	DOWN
TRIM52	0.0791433	7.8055	5.3162	1.31377e-07	2.09201e-06	6.58713	NOT
SRPRB	0.0776367	8.4289	5.31587	1.31603e-07	2.09312e-06	6.58547	NOT
PTPRO	0.041038	7.11616	5.31528	1.32021e-07	2.09726e-06	6.58242	NOT
C1orf59	0.102917	8.79659	5.30591	1.3879e-07	2.20217e-06	6.5342	NOT
MYD88	-0.0907927	9.92373	-5.30361	1.40498e-07	2.22564e-06	6.52241	NOT
NFU1	0.065643	7.72441	5.30347	1.40602e-07	2.22564e-06	6.52169	NOT
SAR1B	0.0724812	7.35694	5.30205	1.41669e-07	2.23988e-06	6.5144	NOT
P2RX7	-0.0844041	8.14267	-5.30146	1.42114e-07	2.24426e-06	6.51138	NOT
ANAPC10	0.0665083	7.22691	5.29649	1.45922e-07	2.30167e-06	6.48589	NOT
OPTN	0.111402	8.31166	5.29484	1.47208e-07	2.31922e-06	6.47743	UP
SLC27A3	-0.0970774	9.26793	-5.29323	1.48478e-07	2.33647e-06	6.46914	NOT
CEBPG	0.0788047	8.06716	5.29283	1.48791e-07	2.33864e-06	6.46711	NOT
ETFA	0.0846544	9.18591	5.29145	1.49886e-07	2.35309e-06	6.46004	NOT
FAM96A	0.148003	9.10202	5.29026	1.50841e-07	2.36529e-06	6.45392	UP
MED22	-0.111533	8.53706	-5.28882	1.51999e-07	2.38066e-06	6.44655	DOWN
SLC10A3	-0.0720563	8.20746	-5.28463	1.55419e-07	2.43137e-06	6.4251	NOT
ANKRD12	0.142725	8.17941	5.28385	1.56063e-07	2.43728e-06	6.42111	UP
ZFHX3	-0.0630838	7.50839	-5.28362	1.56255e-07	2.43728e-06	6.41992	NOT
PDCD10	0.0470221	7.07221	5.28351	1.56343e-07	2.43728e-06	6.41938	NOT
SETDB1	-0.0669937	8.49541	-5.2832	1.56606e-07	2.43852e-06	6.41777	NOT
GMEB2	-0.0775238	8.759	-5.28075	1.58655e-07	2.46756e-06	6.40523	NOT
KIAA0556	-0.0661859	8.21944	-5.28	1.59282e-07	2.47443e-06	6.40143	NOT
SLC5A6	-0.0572346	7.77755	-5.27965	1.59579e-07	2.47616e-06	6.39963	NOT
CHMP4A	0.068744	9.11798	5.27937	1.59821e-07	2.47704e-06	6.39818	NOT
ZCCHC9	0.0739493	8.20795	5.27744	1.61464e-07	2.4996e-06	6.38832	NOT
TIMP1	-0.14271	11.6565	-5.2763	1.62442e-07	2.51184e-06	6.38249	DOWN
SLC45A4	-0.105055	8.40647	-5.27546	1.63165e-07	2.52009e-06	6.37822	NOT
PCK2	-0.0667424	8.10247	-5.27101	1.67063e-07	2.57733e-06	6.35545	NOT
DNAJB12	-0.053898	7.79672	-5.26937	1.6852e-07	2.59681e-06	6.34709	NOT
FAM125B	-0.0667719	7.57587	-5.26468	1.72754e-07	2.65761e-06	6.32317	NOT
GDPD5	-0.09436	7.93286	-5.26456	1.72864e-07	2.65761e-06	6.32256	NOT
BCAP31	-0.0757641	10.373	-5.2622	1.7504e-07	2.68798e-06	6.3105	NOT
TMEM185B	-0.0622821	7.95658	-5.26167	1.75527e-07	2.69235e-06	6.30783	NOT
OS9	-0.0767315	8.21976	-5.26034	1.76766e-07	2.70729e-06	6.30104	NOT
ZFPL1	-0.047402	7.47889	-5.26019	1.76906e-07	2.70729e-06	6.30028	NOT
KLF2	-0.0875949	12.9317	-5.25957	1.77491e-07	2.71313e-06	6.2971	NOT
DPP8	-0.0659505	8.3907	-5.25434	1.82465e-07	2.78598e-06	6.27047	NOT
RAB40C	-0.087135	9.59544	-5.2522	1.8454e-07	2.81214e-06	6.25957	NOT
PDS5A	0.0733388	8.02446	5.25214	1.84599e-07	2.81214e-06	6.25926	NOT
TPP1	-0.137429	10.236	-5.25071	1.85994e-07	2.82859e-06	6.25201	DOWN
DEDD2	-0.100098	10.863	-5.2506	1.86103e-07	2.82859e-06	6.25144	NOT
SLC38A10	-0.0489858	7.38442	-5.24945	1.87234e-07	2.84256e-06	6.2456	NOT
C14orf2	0.107765	7.96386	5.24733	1.89344e-07	2.87132e-06	6.23481	UP
PLAUR	-0.121318	8.76198	-5.24616	1.90516e-07	2.88582e-06	6.22886	DOWN
SERPINA1	-0.0905394	9.32374	-5.2443	1.92396e-07	2.911e-06	6.21939	NOT
MAPK3	-0.116629	9.6472	-5.2414	1.95359e-07	2.95249e-06	6.20467	DOWN
LXN	0.0729014	7.68378	5.23549	2.01533e-07	3.03907e-06	6.17469	NOT
TYROBP	-0.0812519	13.5672	-5.23549	2.01543e-07	3.03907e-06	6.17464	NOT
DUSP1	-0.143806	11.3702	-5.23458	2.02503e-07	3.0501e-06	6.17007	DOWN
IGFBP7	-0.0922914	8.08715	-5.23243	2.04814e-07	3.08143e-06	6.15913	NOT
PTGDS	-0.180899	8.19719	-5.23137	2.05952e-07	3.09508e-06	6.15379	DOWN
MCTP2	-0.0902365	7.76903	-5.22969	2.07787e-07	3.11914e-06	6.14525	NOT
RBCK1	-0.10306	8.99625	-5.22811	2.09518e-07	3.1416e-06	6.13725	NOT
SELL	-0.130596	12.1856	-5.22764	2.10035e-07	3.14582e-06	6.13488	DOWN
SLC39A1	-0.0649377	8.89442	-5.22305	2.15165e-07	3.21905e-06	6.11163	NOT
PYGB	-0.0898757	8.16957	-5.2223	2.16022e-07	3.22824e-06	6.10781	NOT
GOLGA1	-0.0475527	7.5438	-5.22197	2.16396e-07	3.23023e-06	6.10614	NOT
INPPL1	-0.0977059	9.12282	-5.22105	2.17439e-07	3.24218e-06	6.10151	NOT
CASP9	-0.060266	7.79312	-5.22021	2.18407e-07	3.25297e-06	6.09723	NOT
SLC35C1	-0.0561891	8.07109	-5.21857	2.20298e-07	3.27466e-06	6.08892	NOT
IL17RA	-0.142077	9.38836	-5.21852	2.20353e-07	3.27466e-06	6.08868	DOWN
GRPEL2	0.0829082	7.78375	5.21764	2.21373e-07	3.28616e-06	6.08424	NOT
MGAM	-0.0932571	7.80003	-5.21688	2.22254e-07	3.29558e-06	6.08041	NOT
SLC38A7	-0.0344904	7.14737	-5.21508	2.2437e-07	3.32327e-06	6.07128	NOT
MSN	-0.11626	11.9369	-5.21456	2.24982e-07	3.32864e-06	6.06866	DOWN
RABL3	0.0386957	7.21833	5.21409	2.25539e-07	3.33137e-06	6.06628	NOT
CALM2	0.13125	11.4678	5.21398	2.25666e-07	3.33137e-06	6.06574	UP
ZNFX1	-0.113752	9.47691	-5.21193	2.28106e-07	3.3609e-06	6.05537	DOWN
LOC729021	-0.157456	10.2353	-5.21175	2.28319e-07	3.3609e-06	6.05448	DOWN
CHMP5	0.14568	7.70948	5.2116	2.28497e-07	3.3609e-06	6.05373	UP
CTNNA1	-0.107589	9.56206	-5.21146	2.28672e-07	3.3609e-06	6.05299	DOWN
BASP1	-0.146249	12.697	-5.21094	2.29295e-07	3.36635e-06	6.05037	DOWN
STAT5B	-0.0869472	9.13548	-5.21046	2.29875e-07	3.36874e-06	6.04794	NOT
KATNB1	-0.0652749	8.33678	-5.21038	2.29962e-07	3.36874e-06	6.04757	NOT
TMEM104	-0.029249	7.10517	-5.20842	2.3234e-07	3.39984e-06	6.03766	NOT
MRPL1	0.0675855	7.16303	5.20729	2.33725e-07	3.41638e-06	6.03194	NOT
ACBD3	0.0903035	7.94642	5.204	2.37781e-07	3.47054e-06	6.01537	NOT
CCDC91	0.0433958	7.10116	5.20387	2.3795e-07	3.47054e-06	6.01468	NOT
DPAGT1	-0.0555775	7.6857	-5.20171	2.4065e-07	3.50608e-06	6.00382	NOT
UBC	-0.0642596	14.1184	-5.19765	2.45824e-07	3.57225e-06	5.98333	NOT
TFEB	-0.0475603	7.3978	-5.19757	2.45925e-07	3.57225e-06	5.98293	NOT
SEC16A	-0.107086	9.22096	-5.19752	2.45993e-07	3.57225e-06	5.98267	DOWN
DUSP18	-0.0906872	9.2491	-5.19212	2.53037e-07	3.67054e-06	5.95548	NOT
DNAJC7	0.06601	8.27975	5.19128	2.54148e-07	3.68266e-06	5.95126	NOT
ZBTB20	-0.0716569	7.97355	-5.19106	2.54439e-07	3.68288e-06	5.95016	NOT
EML3	-0.0934807	9.63649	-5.18932	2.56769e-07	3.71259e-06	5.94138	NOT
SET	0.0976353	9.77392	5.18578	2.61561e-07	3.77779e-06	5.92358	NOT
FGD3	-0.0987241	11.8862	-5.18422	2.63705e-07	3.80464e-06	5.91572	NOT
ATP5D	-0.0905366	10.5958	-5.18259	2.65948e-07	3.83287e-06	5.90756	NOT
RPS18	0.195368	10.679	5.17836	2.71894e-07	3.91434e-06	5.88627	UP
PCID2	0.0939281	9.48855	5.17778	2.72707e-07	3.92182e-06	5.8834	NOT
ZMYND15	-0.0666659	7.40064	-5.17536	2.76176e-07	3.96674e-06	5.87123	NOT
C20orf72	0.0681693	8.28371	5.17519	2.76425e-07	3.96674e-06	5.87036	NOT
TSC2	-0.0591857	7.66224	-5.17473	2.7709e-07	3.97201e-06	5.86805	NOT
VPS72	-0.0485763	7.84427	-5.17401	2.78122e-07	3.97882e-06	5.86447	NOT
ARMC7	-0.0534232	7.67109	-5.17399	2.7816e-07	3.97882e-06	5.86434	NOT
P2RX1	-0.110613	8.3128	-5.16866	2.85991e-07	4.08645e-06	5.83761	DOWN
YEATS2	-0.0515789	7.86118	-5.16653	2.89167e-07	4.12742e-06	5.82698	NOT
CCDC77	0.0429491	7.65343	5.16455	2.92173e-07	4.16588e-06	5.81702	NOT
TAZ	-0.0579222	7.87113	-5.16067	2.98127e-07	4.24625e-06	5.7976	NOT
ATXN7L2	-0.0417336	7.33022	-5.16043	2.985e-07	4.24703e-06	5.7964	NOT
MYNN	0.0803026	7.4777	5.158	3.02292e-07	4.29641e-06	5.78425	NOT
ARHGAP4	-0.0877168	10.141	-5.15622	3.051e-07	4.33171e-06	5.77535	NOT
ZNF302	0.112629	7.59317	5.15462	3.07654e-07	4.36333e-06	5.76732	UP
ALDH2	-0.106443	8.81375	-5.15297	3.10293e-07	4.3961e-06	5.7591	DOWN
NIF3L1	0.0872728	8.64622	5.15202	3.11832e-07	4.41322e-06	5.75434	NOT
ZNF615	0.0482965	7.68467	5.14947	3.15978e-07	4.46716e-06	5.74163	NOT
PPA2	0.0552949	7.40928	5.14888	3.16948e-07	4.47319e-06	5.73868	NOT
DNAJC15	0.0737375	7.59129	5.14881	3.17074e-07	4.47319e-06	5.7383	NOT
MSRA	-0.0888186	8.44781	-5.14377	3.25463e-07	4.58669e-06	5.71316	NOT
BTD	-0.0487791	7.37615	-5.1416	3.29147e-07	4.63373e-06	5.70233	NOT
ADRM1	-0.0757218	8.86202	-5.13854	3.3441e-07	4.70286e-06	5.68707	NOT
F8A1	-0.111907	8.70999	-5.13458	3.4133e-07	4.79512e-06	5.66736	DOWN
RDH13	-0.0670265	7.54409	-5.13329	3.43623e-07	4.82228e-06	5.66091	NOT
TOLLIP	-0.0634254	7.93331	-5.13297	3.44191e-07	4.82517e-06	5.65932	NOT
CRBN	0.139446	8.67076	5.13034	3.48907e-07	4.88616e-06	5.64623	UP
SMPD1	-0.052079	7.51667	-5.12897	3.51392e-07	4.91581e-06	5.6394	NOT
B3GNT8	-0.0556065	7.43705	-5.12479	3.59068e-07	5.01794e-06	5.61861	NOT
TMEM30A	0.0749543	7.64677	5.12121	3.65763e-07	5.10238e-06	5.60083	NOT
UPF3B	0.0597077	7.43012	5.12115	3.65874e-07	5.10238e-06	5.60054	NOT
TMCC3	-0.0785967	7.66633	-5.12093	3.66295e-07	5.10293e-06	5.59943	NOT
HSPA8	0.103176	11.1622	5.11912	3.69729e-07	5.1454e-06	5.59046	NOT
VPREB3	0.174364	8.27325	5.11822	3.71463e-07	5.16414e-06	5.58596	UP
KIR2DL3	-0.154708	8.15076	-5.11648	3.74814e-07	5.20532e-06	5.57732	DOWN
ANKZF1	-0.0528895	7.63779	-5.11564	3.76435e-07	5.2224e-06	5.57316	NOT
CITED4	-0.0802515	7.6525	-5.1143	3.79058e-07	5.25333e-06	5.56648	NOT
STIM1	-0.0703386	8.25924	-5.11297	3.81667e-07	5.28402e-06	5.55988	NOT
UNC50	0.0790707	9.48173	5.11101	3.85544e-07	5.32699e-06	5.55016	NOT
CRTC2	-0.0576471	7.73479	-5.11099	3.85569e-07	5.32699e-06	5.5501	NOT
GGPS1	0.0793625	8.42315	5.10804	3.91478e-07	5.40304e-06	5.53547	NOT
MFN2	-0.104352	8.40651	-5.10776	3.92039e-07	5.4052e-06	5.53409	NOT
TLR5	-0.115281	8.44979	-5.10708	3.93419e-07	5.41864e-06	5.53071	DOWN
HSBP1	0.0752937	9.28667	5.10663	3.94333e-07	5.42563e-06	5.52848	NOT
TRIP4	0.0611778	8.16483	5.10624	3.9512e-07	5.42629e-06	5.52656	NOT
FCHO1	-0.0712653	7.95522	-5.10621	3.95193e-07	5.42629e-06	5.52638	NOT
DRG1	0.0678434	8.37913	5.10481	3.98053e-07	5.45995e-06	5.51945	NOT
ALOX5AP	-0.107359	13.0869	-5.10459	3.98498e-07	5.46045e-06	5.51837	DOWN
RAB24	-0.0905115	9.06083	-5.10202	4.03814e-07	5.52761e-06	5.50563	NOT
BTBD10	0.0720014	7.92957	5.09945	4.09181e-07	5.59536e-06	5.49292	NOT
GFOD1	-0.113005	8.71631	-5.09563	4.1731e-07	5.70061e-06	5.47401	DOWN
SCO1	0.0498114	8.03422	5.09543	4.17732e-07	5.70061e-06	5.47303	NOT
ZBED5	0.126342	8.57924	5.0909	4.27585e-07	5.82912e-06	5.45061	UP
C20orf24	-0.0764948	11.9962	-5.08974	4.30123e-07	5.85774e-06	5.44492	NOT
ACAT2	0.0624453	8.03791	5.08848	4.32913e-07	5.88974e-06	5.4387	NOT
NEU1	-0.0628853	8.31468	-5.08438	4.42126e-07	6.00896e-06	5.41845	NOT
ZNF384	-0.04419	7.46682	-5.0824	4.4665e-07	6.06427e-06	5.40866	NOT
NR1H2	-0.0779475	8.58191	-5.08124	4.49311e-07	6.09421e-06	5.40295	NOT
SIRT2	-0.0477148	7.65959	-5.07969	4.52905e-07	6.13673e-06	5.39529	NOT
TOP2B	0.08554	9.60906	5.07853	4.55602e-07	6.16702e-06	5.38958	NOT
ANKHD1-EIF4EBP3	-0.0527197	7.37314	-5.07563	4.62412e-07	6.24671e-06	5.37531	NOT
KDELR1	-0.0724787	8.40344	-5.07548	4.62777e-07	6.24671e-06	5.37455	NOT
PANK4	-0.0447737	7.59478	-5.07543	4.62892e-07	6.24671e-06	5.37431	NOT
RBM23	-0.0927881	10.1929	-5.07338	4.67777e-07	6.30626e-06	5.36422	NOT
IMPA1	0.0827539	7.35701	5.06995	4.76061e-07	6.40599e-06	5.34734	NOT
HIST2H2AC	-0.122731	9.06269	-5.06992	4.76134e-07	6.40599e-06	5.34719	DOWN
LZTR1	-0.080484	8.86401	-5.06694	4.83458e-07	6.49799e-06	5.33251	NOT
C1RL	-0.0864308	8.44153	-5.05975	5.01565e-07	6.73458e-06	5.29717	NOT
DAGLB	-0.0680392	8.58895	-5.05899	5.03525e-07	6.75411e-06	5.29342	NOT
NAGLU	-0.0413304	7.58268	-5.05808	5.05873e-07	6.77881e-06	5.28894	NOT
ZNF746	-0.101389	9.73417	-5.05748	5.07409e-07	6.79256e-06	5.28603	NOT
ARRDC1	-0.0479452	7.32375	-5.05642	5.10158e-07	6.82253e-06	5.28084	NOT
ARL2BP	0.0773365	9.12532	5.05513	5.1354e-07	6.86089e-06	5.27448	NOT
LASP1	-0.0934197	12.0551	-5.05483	5.14329e-07	6.86458e-06	5.27301	NOT
C6orf115	0.0936638	8.70711	5.05213	5.21475e-07	6.94667e-06	5.25974	NOT
REXO2	0.088113	8.89049	5.052	5.21811e-07	6.94667e-06	5.25912	NOT
SP2	-0.0885436	8.47624	-5.05191	5.2204e-07	6.94667e-06	5.2587	NOT
SORL1	-0.162485	11.2579	-5.05163	5.22785e-07	6.94967e-06	5.25733	DOWN
LITAF	-0.110255	13.0478	-5.04972	5.27925e-07	7.01101e-06	5.24793	DOWN
C7orf26	-0.0642421	9.07564	-5.04934	5.28953e-07	7.01768e-06	5.24606	NOT
BNIPL	-0.0245771	7.10839	-5.04788	5.32894e-07	7.06296e-06	5.23892	NOT
TBC1D15	0.0939968	8.02859	5.04692	5.35502e-07	7.09049e-06	5.23423	NOT
SLC35A1	0.133924	8.57599	5.04616	5.37581e-07	7.11097e-06	5.23051	UP
BZRAP1	-0.0632196	7.40598	-5.04577	5.38647e-07	7.11802e-06	5.2286	NOT
C4orf27	0.0559361	7.27388	5.04498	5.40831e-07	7.13982e-06	5.22471	NOT
RDH5	-0.0625773	7.63559	-5.04447	5.42229e-07	7.15122e-06	5.22223	NOT
TBC1D20	-0.0503503	7.91938	-5.04101	5.51874e-07	7.27124e-06	5.20528	NOT
MAD2L1	0.0287457	7.05142	5.0381	5.60106e-07	7.37243e-06	5.19105	NOT
SIGLEC7	-0.0535358	7.35752	-5.03773	5.61166e-07	7.37911e-06	5.18924	NOT
SLC9A3R1	-0.0935567	10.3647	-5.03606	5.65958e-07	7.43481e-06	5.18106	NOT
REEP5	0.152855	9.29506	5.03441	5.70723e-07	7.49003e-06	5.17301	UP
UNC93B1	-0.0648079	7.7752	-5.03371	5.7277e-07	7.50952e-06	5.16957	NOT
ZNF385A	-0.0804209	7.90237	-5.03341	5.73644e-07	7.51362e-06	5.1681	NOT
PLCD1	-0.0506194	7.56024	-5.02937	5.85565e-07	7.66224e-06	5.14833	NOT
C18orf21	0.0565642	7.81899	5.02809	5.89369e-07	7.70447e-06	5.14211	NOT
ORAI3	-0.0339363	7.18724	-5.02578	5.96318e-07	7.78769e-06	5.13085	NOT
TUBA1C	-0.0960916	10.8958	-5.02485	5.99145e-07	7.81697e-06	5.1263	NOT
CHFR	-0.0620014	9.9539	-5.02308	6.04559e-07	7.87307e-06	5.11766	NOT
PREB	-0.0470055	7.89282	-5.02306	6.04624e-07	7.87307e-06	5.11756	NOT
FKBP15	-0.065491	8.27254	-5.02263	6.05939e-07	7.88251e-06	5.11547	NOT
WDR12	0.047548	7.44205	5.02158	6.09187e-07	7.91032e-06	5.11033	NOT
PPBP	0.200996	9.87692	5.02156	6.0926e-07	7.91032e-06	5.11022	UP
C3orf26	0.034294	7.27925	5.01994	6.14277e-07	7.96771e-06	5.10234	NOT
FAM127A	-0.0647502	8.38366	-5.01952	6.156e-07	7.97713e-06	5.10027	NOT
TSPAN4	-0.0660538	7.57473	-5.0184	6.1911e-07	8.01484e-06	5.09481	NOT
DDIT4	-0.115387	8.78171	-5.01681	6.24102e-07	8.07164e-06	5.08709	DOWN
ADCK4	-0.0569904	7.59433	-5.01502	6.298e-07	8.13746e-06	5.07836	NOT
ZNF324	-0.0845962	8.53222	-5.01407	6.32855e-07	8.16428e-06	5.07371	NOT
SNURF	0.0614742	7.95429	5.01399	6.33099e-07	8.16428e-06	5.07334	NOT
RWDD1	0.0857838	7.48244	5.01262	6.37502e-07	8.21314e-06	5.06668	NOT
CLCN7	-0.0986388	10.1405	-5.01199	6.3956e-07	8.23171e-06	5.06358	NOT
FLOT1	-0.116609	10.1094	-5.01177	6.40246e-07	8.23262e-06	5.06255	DOWN
ALG13	0.0671629	7.54292	5.01085	6.43243e-07	8.26319e-06	5.05807	NOT
DPEP2	-0.103602	10.803	-5.00742	6.5454e-07	8.40024e-06	5.04134	NOT
EFEMP2	-0.0378205	7.19072	-4.99972	6.80532e-07	8.72544e-06	5.00393	NOT
IGF2R	-0.143485	11.5006	-4.99879	6.83718e-07	8.75788e-06	4.99944	DOWN
DLD	0.0650353	7.56969	4.99774	6.87383e-07	8.7964e-06	4.99431	NOT
PANX2	-0.134621	8.64577	-4.99749	6.88256e-07	8.79914e-06	4.99309	DOWN
GIYD1	-0.0614366	7.82972	-4.99632	6.92309e-07	8.84249e-06	4.98745	NOT
KIAA0415	-0.0406669	7.21412	-4.99352	7.02201e-07	8.96027e-06	4.97382	NOT
ANXA6	-0.0537127	7.65744	-4.99319	7.03363e-07	8.96654e-06	4.97223	NOT
SUCLG2	0.0864367	7.93905	4.99279	7.04774e-07	8.97595e-06	4.97031	NOT
DDHD2	0.0496205	8.09326	4.99166	7.08806e-07	9.01871e-06	4.96483	NOT
KLHL18	-0.0493223	7.53068	-4.99091	7.11485e-07	9.03813e-06	4.96121	NOT
C6orf129	0.0736171	7.81369	4.99086	7.11685e-07	9.03813e-06	4.96094	NOT
AGGF1	0.0649166	7.6212	4.98907	7.18155e-07	9.11163e-06	4.95224	NOT
FADD	-0.0694009	8.80873	-4.98753	7.2373e-07	9.17365e-06	4.94482	NOT
ARCN1	-0.0878946	9.8378	-4.98734	7.24431e-07	9.17384e-06	4.94389	NOT
TRIP11	0.0391299	7.61117	4.9862	7.28633e-07	9.21831e-06	4.93833	NOT
TMEM14C	0.07605	8.86592	4.98433	7.35537e-07	9.29686e-06	4.92927	NOT
GBF1	-0.0559423	7.58888	-4.98052	7.4978e-07	9.46269e-06	4.91086	NOT
ENOPH1	0.0895502	7.86331	4.98044	7.50074e-07	9.46269e-06	4.91048	NOT
AGPS	0.0462719	7.52509	4.98014	7.51212e-07	9.46811e-06	4.90902	NOT
CSTB	-0.0855643	11.1388	-4.97913	7.55062e-07	9.50766e-06	4.90411	NOT
PGCP	-0.0777528	8.18903	-4.97817	7.58695e-07	9.54442e-06	4.8995	NOT
APOB48R	-0.0915185	7.99506	-4.97653	7.65014e-07	9.61485e-06	4.89154	NOT
KLHL21	-0.0752726	8.08527	-4.97569	7.68264e-07	9.64662e-06	4.88747	NOT
FUK	-0.0563535	7.87475	-4.97426	7.738e-07	9.70701e-06	4.88057	NOT
GATAD2B	-0.0852463	8.29322	-4.9739	7.75204e-07	9.71551e-06	4.87883	NOT
B2M	0.13134	13.0998	4.97103	7.86462e-07	9.84735e-06	4.86499	UP
MRPL14	0.0685629	8.05133	4.96874	7.95577e-07	9.95216e-06	4.85392	NOT
ENO1	-0.100957	11.9847	-4.96839	7.9699e-07	9.96051e-06	4.85222	NOT
ACTR10	0.0796864	8.53946	4.96675	8.03569e-07	1.00333e-05	4.84433	NOT
SETDB2	0.0809247	7.98074	4.9654	8.09047e-07	1.00923e-05	4.8378	NOT
LILRA2	-0.125433	10.856	-4.9645	8.12717e-07	1.01286e-05	4.83346	DOWN
ZUFSP	0.0501281	7.33378	4.96397	8.14883e-07	1.01462e-05	4.8309	NOT
MCTS1	0.0681399	7.1761	4.96344	8.17078e-07	1.0164e-05	4.82832	NOT
FASN	-0.0957993	8.08075	-4.96018	8.30539e-07	1.03219e-05	4.81263	NOT
CBX4	-0.0580364	8.39627	-4.95987	8.31864e-07	1.03287e-05	4.8111	NOT
SLC25A29	-0.0662873	7.44115	-4.95953	8.33278e-07	1.03367e-05	4.80947	NOT
C1orf162	-0.0805524	12.099	-4.95886	8.36063e-07	1.03616e-05	4.80627	NOT
DHX8	-0.0548878	7.55164	-4.95476	8.53452e-07	1.05673e-05	4.7865	NOT
AKAP7	0.0441531	7.07131	4.95129	8.68446e-07	1.0743e-05	4.76978	NOT
NAP1L1	0.0990722	8.10413	4.94915	8.77808e-07	1.08488e-05	4.75949	NOT
CARD9	-0.0867854	8.54993	-4.9476	8.84644e-07	1.09231e-05	4.75204	NOT
KIAA2013	-0.084542	9.07201	-4.94403	9.00595e-07	1.11098e-05	4.73489	NOT
ETS2	-0.0813983	8.25618	-4.94227	9.08572e-07	1.11979e-05	4.72643	NOT
TMOD4	-0.0283587	7.1667	-4.94199	9.09849e-07	1.12033e-05	4.72508	NOT
LRCH4	-0.114963	9.84383	-4.94128	9.13075e-07	1.12327e-05	4.72168	DOWN
LRP10	-0.1225	11.0549	-4.94022	9.17942e-07	1.12822e-05	4.71658	DOWN
PCNX	-0.104929	9.98637	-4.93894	9.23817e-07	1.13439e-05	4.71046	NOT
LRP1	-0.0397658	7.14222	-4.93587	9.38112e-07	1.15089e-05	4.69572	NOT
ZNF408	-0.0498321	7.64208	-4.92957	9.68133e-07	1.18663e-05	4.66549	NOT
NOL7	0.0853094	9.92597	4.92815	9.74999e-07	1.19379e-05	4.6587	NOT
NUDT21	0.0490098	7.21897	4.928	9.75766e-07	1.19379e-05	4.65795	NOT
ITGA5	-0.104499	9.28344	-4.9275	9.78211e-07	1.19569e-05	4.65555	NOT
CCDC25	0.0537912	7.44383	4.92672	9.81986e-07	1.19921e-05	4.65185	NOT
TRIOBP	-0.0667945	8.27894	-4.92328	9.98986e-07	1.21882e-05	4.63538	NOT
HGS	-0.0738987	9.9654	-4.92311	9.99869e-07	1.21882e-05	4.63453	NOT
S100A4	-0.0689034	13.4527	-4.91258	1.05371e-06	1.28328e-05	4.5842	NOT
TTLL12	-0.0664632	7.96055	-4.91211	1.05621e-06	1.28515e-05	4.58194	NOT
NCSTN	-0.101898	10.1012	-4.9109	1.06256e-06	1.2917e-05	4.57618	NOT
ZBTB45	-0.0508824	7.59181	-4.9098	1.06841e-06	1.29764e-05	4.57091	NOT
CCNK	-0.0719968	9.475	-4.90902	1.07254e-06	1.30146e-05	4.56722	NOT
DMWD	-0.0572469	7.51199	-4.9066	1.08553e-06	1.31604e-05	4.55566	NOT
WBP2	-0.112758	12.6943	-4.90636	1.08686e-06	1.31645e-05	4.55449	DOWN
MRPS23	0.048746	7.43775	4.90576	1.09007e-06	1.31914e-05	4.55166	NOT
MAPRE3	-0.0464098	7.29535	-4.90454	1.09672e-06	1.32599e-05	4.54583	NOT
TCF25	-0.0817144	9.84383	-4.90265	1.10707e-06	1.33573e-05	4.53681	NOT
C1orf66	-0.0447696	7.61641	-4.90259	1.10742e-06	1.33573e-05	4.53651	NOT
ARID3B	-0.069189	8.7148	-4.90252	1.10777e-06	1.33573e-05	4.53621	NOT
CLEC7A	0.0405695	7.11732	4.89961	1.1239e-06	1.35338e-05	4.52234	NOT
SNX27	-0.0974247	10.1283	-4.89952	1.12444e-06	1.35338e-05	4.52188	NOT
EPN1	-0.0925448	10.7947	-4.89819	1.13188e-06	1.36111e-05	4.51556	NOT
ARID5A	-0.0306282	7.12329	-4.89474	1.15141e-06	1.38334e-05	4.49915	NOT
TRIM41	-0.0594511	8.66419	-4.89379	1.15689e-06	1.38868e-05	4.49459	NOT
HPRT1	0.0750564	8.19156	4.88821	1.18933e-06	1.42634e-05	4.46807	NOT
HIVEP1	-0.0445096	7.27723	-4.88676	1.1979e-06	1.43534e-05	4.46118	NOT
MTMR4	-0.0582752	8.44694	-4.88188	1.22721e-06	1.46914e-05	4.43799	NOT
EFHA1	0.123781	8.44243	4.88081	1.23375e-06	1.47487e-05	4.4329	UP
TAF6L	-0.0514032	7.73248	-4.88073	1.23421e-06	1.47487e-05	4.43254	NOT
TMCO6	-0.0413171	7.39204	-4.8796	1.24112e-06	1.47953e-05	4.42718	NOT
SF3A2	-0.10617	9.69429	-4.87956	1.24136e-06	1.47953e-05	4.427	DOWN
HLA-H	-0.260478	10.0516	-4.87955	1.24143e-06	1.47953e-05	4.42695	DOWN
DGCR2	-0.0761662	8.56041	-4.87533	1.26764e-06	1.50941e-05	4.40691	NOT
FAM53B	-0.0661024	8.49208	-4.87308	1.28183e-06	1.52496e-05	4.39623	NOT
PSKH1	-0.0281317	7.08901	-4.87011	1.30079e-06	1.54498e-05	4.38216	NOT
RHBDF2	-0.0969934	9.57899	-4.86993	1.30193e-06	1.54498e-05	4.38132	NOT
ZNF707	-0.0334705	7.32005	-4.86978	1.30291e-06	1.54498e-05	4.38059	NOT
PCMTD1	0.147415	8.2413	4.86972	1.30329e-06	1.54498e-05	4.38032	UP
PHKA2	-0.0830787	8.86147	-4.86923	1.3064e-06	1.5473e-05	4.37803	NOT
PDXK	-0.0793071	9.2016	-4.8662	1.32613e-06	1.56927e-05	4.36366	NOT
REM2	-0.0958819	8.17265	-4.86539	1.33142e-06	1.57414e-05	4.35984	NOT
RPS6KB1	0.107537	8.0068	4.86472	1.33586e-06	1.57799e-05	4.35665	UP
PDLIM7	-0.131535	9.00394	-4.86352	1.34378e-06	1.58595e-05	4.35098	DOWN
TSPAN14	-0.0603467	8.15674	-4.86256	1.35017e-06	1.59208e-05	4.34643	NOT
DAAM2	-0.0597393	7.19228	-4.86199	1.354e-06	1.59381e-05	4.34372	NOT
RALY	-0.0914416	9.51612	-4.86198	1.35402e-06	1.59381e-05	4.3437	NOT
SLC25A11	-0.04766	7.69551	-4.8605	1.36395e-06	1.6029e-05	4.3367	NOT
MLL	-0.0741277	7.83676	-4.86047	1.36415e-06	1.6029e-05	4.33656	NOT
B4GALT5	-0.119276	10.1037	-4.86002	1.36716e-06	1.60503e-05	4.33445	DOWN
BTK	0.076671	9.14418	4.85617	1.3934e-06	1.6344e-05	4.31622	NOT
CDK5R1	-0.0873144	8.00155	-4.85554	1.39769e-06	1.63691e-05	4.31327	NOT
EPOR	-0.0645175	7.59951	-4.8555	1.39799e-06	1.63691e-05	4.31307	NOT
SLC26A8	-0.0388157	7.13098	-4.85513	1.40057e-06	1.6385e-05	4.3113	NOT
TRIB2	0.0769566	8.02188	4.85464	1.40394e-06	1.641e-05	4.30899	NOT
CTGF	0.0254074	7.04167	4.85429	1.40637e-06	1.64241e-05	4.30733	NOT
C9orf46	0.0720409	8.33004	4.85356	1.4114e-06	1.64678e-05	4.30392	NOT
C15orf39	-0.13887	9.97968	-4.85339	1.41258e-06	1.64678e-05	4.30311	DOWN
AP1G2	-0.0682876	8.64085	-4.85092	1.42992e-06	1.66413e-05	4.29142	NOT
CBL	-0.0837972	8.41027	-4.85091	1.42996e-06	1.66413e-05	4.29139	NOT
ANXA5	-0.107409	10.4612	-4.84865	1.44592e-06	1.68124e-05	4.28075	DOWN
C16orf57	-0.0996359	9.14016	-4.84681	1.4591e-06	1.69509e-05	4.27206	NOT
TMEM175	-0.0714264	9.11923	-4.84584	1.46608e-06	1.70172e-05	4.26748	NOT
SURF4	-0.0611854	9.16584	-4.83384	1.5551e-06	1.80207e-05	4.21098	NOT
LEPROTL1	0.149976	8.83419	4.83379	1.5555e-06	1.80207e-05	4.21073	UP
PHKG2	-0.0505357	7.7466	-4.83365	1.55658e-06	1.80207e-05	4.21007	NOT
PIGT	-0.0520939	8.386	-4.8325	1.56536e-06	1.81067e-05	4.20468	NOT
VSIG8	-0.03259	7.11994	-4.83227	1.56714e-06	1.81116e-05	4.20359	NOT
TM9SF3	0.0632186	7.81929	4.83128	1.5748e-06	1.81844e-05	4.19892	NOT
ATP6V1F	-0.0724986	10.9128	-4.82952	1.58842e-06	1.83258e-05	4.19066	NOT
CAMK2G	-0.0714612	9.13599	-4.82848	1.59654e-06	1.83887e-05	4.18578	NOT
ANG	-0.0757394	7.82195	-4.82847	1.59663e-06	1.83887e-05	4.18572	NOT
ZNF23	0.0441961	7.15198	4.82714	1.6071e-06	1.84934e-05	4.17946	NOT
RABEP1	0.0975815	8.29623	4.82455	1.62757e-06	1.87128e-05	4.16733	NOT
POLRMT	-0.0514674	7.70225	-4.82138	1.65311e-06	1.89901e-05	4.15241	NOT
TIMP2	-0.0847438	7.754	-4.82107	1.65561e-06	1.90025e-05	4.15096	NOT
SEC61A1	-0.0773151	9.93018	-4.81889	1.67338e-06	1.919e-05	4.14073	NOT
GLTPD1	-0.0402432	7.34656	-4.81754	1.68442e-06	1.93e-05	4.13444	NOT
ZDHHC7	-0.071871	10.2067	-4.8162	1.6955e-06	1.94103e-05	4.12815	NOT
RERE	-0.0966596	9.59983	-4.81489	1.70642e-06	1.95187e-05	4.122	NOT
RNF7	0.0600304	8.31435	4.8132	1.72061e-06	1.96641e-05	4.11407	NOT
ZNF529	0.0679352	7.83162	4.81256	1.72594e-06	1.97082e-05	4.1111	NOT
GYG1	-0.0893627	9.64366	-4.8113	1.73666e-06	1.98136e-05	4.10517	NOT
PPP1CC	0.12023	9.98838	4.81055	1.74299e-06	1.98689e-05	4.10169	UP
ZNF20	0.0489544	7.61322	4.8098	1.74938e-06	1.99169e-05	4.09818	NOT
PIP5K1C	-0.0761202	8.27578	-4.80971	1.75018e-06	1.99169e-05	4.09774	NOT
ZNF598	-0.0456265	7.86295	-4.80826	1.76263e-06	2.00415e-05	4.09095	NOT
CCNH	0.0597633	7.42107	4.80623	1.78017e-06	2.02237e-05	4.08146	NOT
LOC644634	-0.0582419	8.02429	-4.80557	1.78593e-06	2.02719e-05	4.07837	NOT
CA4	-0.160741	9.13276	-4.80266	1.81152e-06	2.05397e-05	4.06474	DOWN
CD97	-0.0910656	10.1543	-4.80253	1.81259e-06	2.05397e-05	4.06417	NOT
GTPBP4	0.0830724	8.66885	4.80187	1.8185e-06	2.05891e-05	4.06106	NOT
EXOSC9	0.0651932	7.78951	4.80148	1.82193e-06	2.06105e-05	4.05925	NOT
CRIPAK	-0.108642	8.23766	-4.80043	1.83133e-06	2.06991e-05	4.05433	DOWN
LYRM5	0.0903054	8.1459	4.80026	1.83286e-06	2.06991e-05	4.05352	NOT
C7orf54	-0.0853744	8.48757	-4.79931	1.84135e-06	2.07774e-05	4.0491	NOT
HMGB2	0.0923357	8.47387	4.79848	1.84882e-06	2.08441e-05	4.04522	NOT
BAK1	-0.0549785	7.59177	-4.79819	1.8514e-06	2.08509e-05	4.04388	NOT
RPL15	0.120476	10.9928	4.79807	1.85254e-06	2.08509e-05	4.04329	UP
POLD1	-0.040906	7.26441	-4.79717	1.86065e-06	2.09094e-05	4.03911	NOT
MARS	-0.0518364	8.43657	-4.79715	1.86088e-06	2.09094e-05	4.03899	NOT
GPBP1	0.0942632	7.99874	4.79512	1.87934e-06	2.10991e-05	4.02954	NOT
PRKD2	-0.0896633	8.375	-4.79382	1.89131e-06	2.12157e-05	4.02346	NOT
ARHGDIA	-0.0956756	9.8934	-4.78595	1.96514e-06	2.20254e-05	3.98678	NOT
ROPN1L	-0.108692	8.40261	-4.78534	1.97097e-06	2.20722e-05	3.98394	DOWN
CABLES2	-0.0400947	7.30722	-4.78481	1.97611e-06	2.21113e-05	3.98145	NOT
UBE2L3	-0.0517572	7.83196	-4.7831	1.99261e-06	2.22772e-05	3.97349	NOT
S100A11	-0.122543	11.2398	-4.78229	2.00042e-06	2.23458e-05	3.96974	DOWN
SBF1	-0.0781629	9.2572	-4.78212	2.00214e-06	2.23463e-05	3.96892	NOT
FOXO3	-0.144205	11.3569	-4.7819	2.00428e-06	2.23516e-05	3.96789	DOWN
PPP1R11	-0.0924482	10.7437	-4.78114	2.0117e-06	2.24156e-05	3.96436	NOT
UGDH	0.0515107	7.35851	4.77898	2.03292e-06	2.26331e-05	3.95431	NOT
C17orf56	-0.0468641	7.58964	-4.77837	2.03891e-06	2.2681e-05	3.95149	NOT
ZNF219	-0.0325606	7.16947	-4.77816	2.04102e-06	2.26855e-05	3.9505	NOT
AK3	0.0798325	8.36211	4.77642	2.0583e-06	2.28586e-05	3.94243	NOT
MYADM	-0.171183	10.3384	-4.77414	2.08125e-06	2.30943e-05	3.93181	DOWN
VPS39	-0.0563931	7.81868	-4.77297	2.09308e-06	2.32062e-05	3.92638	NOT
C1orf91	-0.0382385	7.36574	-4.77161	2.10695e-06	2.33407e-05	3.92006	NOT
ATP5C1	0.152092	8.23805	4.77051	2.11823e-06	2.34462e-05	3.91495	UP
FBXL15	-0.0494035	7.96496	-4.76975	2.12602e-06	2.35129e-05	3.91143	NOT
CLEC1A	-0.0403474	7.1663	-4.76935	2.13016e-06	2.35392e-05	3.90957	NOT
NDRG1	-0.0771283	8.85766	-4.76847	2.13928e-06	2.36205e-05	3.90548	NOT
FOS	-0.136226	8.96154	-4.76755	2.14888e-06	2.36975e-05	3.90119	DOWN
EXOSC8	0.061807	7.88077	4.76746	2.14981e-06	2.36975e-05	3.90078	NOT
ZNF613	0.0413935	7.21222	4.76393	2.18692e-06	2.40868e-05	3.88439	NOT
RBM25	0.136697	8.70269	4.76142	2.21362e-06	2.43608e-05	3.87278	UP
DDX18	0.0814249	9.10215	4.76114	2.2167e-06	2.43612e-05	3.87145	NOT
RENBP	-0.0977031	9.05389	-4.76108	2.21731e-06	2.43612e-05	3.87118	NOT
PSMB6	0.0753773	10.4821	4.75834	2.24695e-06	2.46666e-05	3.85847	NOT
KPNA6	-0.0943407	9.33284	-4.75522	2.28105e-06	2.50204e-05	3.84405	NOT
TAF12	0.06849	8.28935	4.75349	2.3003e-06	2.52108e-05	3.83601	NOT
HIP1	-0.100331	7.71513	-4.75252	2.31101e-06	2.52823e-05	3.83156	NOT
RPS15A	0.229142	10.7882	4.75252	2.3111e-06	2.52823e-05	3.83152	UP
DEF6	-0.0802698	9.70942	-4.75239	2.31249e-06	2.52823e-05	3.83095	NOT
TNFRSF8	-0.0600019	7.88938	-4.75183	2.31874e-06	2.53298e-05	3.82837	NOT
CACNA1E	-0.0396237	7.13136	-4.75078	2.33062e-06	2.54388e-05	3.82347	NOT
PRMT5	-0.0560452	7.86124	-4.74992	2.34032e-06	2.55238e-05	3.8195	NOT
ANKRD33	-0.086956	8.08747	-4.74955	2.34451e-06	2.55487e-05	3.81779	NOT
RAB1B	-0.0607796	7.94961	-4.74833	2.35832e-06	2.56782e-05	3.81216	NOT
SELPLG	-0.130407	8.67961	-4.74785	2.36377e-06	2.57166e-05	3.80995	DOWN
PAF1	-0.0792536	8.70019	-4.74735	2.36951e-06	2.57581e-05	3.80763	NOT
OTUB1	-0.0604224	7.77185	-4.7465	2.37928e-06	2.58432e-05	3.8037	NOT
MTCH1	-0.0587333	11.0849	-4.74588	2.38643e-06	2.58998e-05	3.80082	NOT
CCDC149	-0.048522	7.28092	-4.744	2.40822e-06	2.61151e-05	3.79212	NOT
SSH2	-0.114475	10.7799	-4.74134	2.43928e-06	2.64251e-05	3.77986	DOWN
YDJC	-0.0439724	7.38986	-4.74122	2.44076e-06	2.64251e-05	3.77928	NOT
ZNF500	-0.0489977	7.75161	-4.7381	2.47777e-06	2.68041e-05	3.76488	NOT
MOBKL2A	-0.124018	9.66621	-4.73428	2.52375e-06	2.72794e-05	3.74728	DOWN
PUS3	0.0463841	7.79667	4.73256	2.54478e-06	2.74845e-05	3.73934	NOT
TTC31	-0.0595317	8.4545	-4.72918	2.58658e-06	2.79133e-05	3.72375	NOT
CTNNBIP1	-0.0514515	7.57222	-4.72803	2.60082e-06	2.80444e-05	3.7185	NOT
GATAD2A	-0.0829728	10.079	-4.7278	2.60381e-06	2.80539e-05	3.7174	NOT
CFLAR	-0.129294	11.2973	-4.72535	2.63463e-06	2.83632e-05	3.70614	DOWN
OCIAD1	0.0788172	9.4366	4.72444	2.6462e-06	2.846e-05	3.70195	NOT
RILPL1	-0.0604602	7.59439	-4.72423	2.64891e-06	2.846e-05	3.70097	NOT
KIAA0513	-0.105822	9.19305	-4.72414	2.65002e-06	2.846e-05	3.70057	NOT
CLEC4E	-0.0691901	7.71825	-4.72227	2.67399e-06	2.86944e-05	3.69195	NOT
C14orf142	0.0786687	7.3402	4.72163	2.68217e-06	2.87591e-05	3.68903	NOT
CD52	0.20356	11.344	4.71491	2.77019e-06	2.9679e-05	3.65814	UP
ATG3	0.0750325	8.27452	4.71457	2.77473e-06	2.97039e-05	3.65657	NOT
VPS36	0.119543	8.02442	4.71382	2.78469e-06	2.97866e-05	3.65315	UP
PPM1B	0.109668	8.34543	4.71176	2.81237e-06	3.00587e-05	3.64368	UP
ATXN2	-0.0627151	9.41573	-4.71108	2.82155e-06	3.01326e-05	3.64057	NOT
CHCHD7	0.0500603	7.60698	4.7106	2.82804e-06	3.01778e-05	3.63837	NOT
ELP2	0.0437754	7.98606	4.70921	2.84699e-06	3.03557e-05	3.63198	NOT
ITIH4	-0.0495119	7.22074	-4.70894	2.85071e-06	3.03712e-05	3.63073	NOT
TRIM56	-0.0857896	8.58174	-4.70845	2.85747e-06	3.0419e-05	3.62846	NOT
IL10RA	-0.0806036	9.657	-4.70821	2.86078e-06	3.04299e-05	3.62736	NOT
FKBP1A	-0.0987744	10.7463	-4.7005	2.96844e-06	3.15501e-05	3.59202	NOT
CCR6	0.0786781	8.02483	4.69888	2.99152e-06	3.177e-05	3.58462	NOT
PTPN4	0.103403	8.40814	4.69798	3.00437e-06	3.18812e-05	3.58052	NOT
LY6G5C	-0.0408802	7.36361	-4.69707	3.01751e-06	3.19952e-05	3.57634	NOT
TBCE	0.0522294	7.75855	4.69517	3.0451e-06	3.22621e-05	3.56764	NOT
COMMD6	0.218943	8.22633	4.69226	3.08773e-06	3.26878e-05	3.55435	UP
HMGN1	0.0932121	9.45969	4.68974	3.12513e-06	3.30576e-05	3.54283	NOT
POLG	-0.055624	8.17454	-4.6888	3.13922e-06	3.31803e-05	3.53853	NOT
TMEM205	-0.087346	9.80435	-4.68845	3.14445e-06	3.32093e-05	3.53694	NOT
BANK1	0.0762807	7.52123	4.68457	3.20332e-06	3.38006e-05	3.5192	NOT
ZYX	-0.131208	11.0126	-4.68443	3.2055e-06	3.38006e-05	3.51855	DOWN
PTGES2	-0.0615958	7.9754	-4.68396	3.2127e-06	3.38499e-05	3.51641	NOT
GTF3C5	-0.0543738	8.17768	-4.6826	3.23355e-06	3.40316e-05	3.51022	NOT
CGRRF1	0.0666544	7.50257	4.6825	3.23504e-06	3.40316e-05	3.50978	NOT
PHF1	-0.0548912	7.90936	-4.68179	3.24613e-06	3.41214e-05	3.50651	NOT
ZNF438	-0.0592689	7.77393	-4.68146	3.25124e-06	3.41482e-05	3.505	NOT
ARV1	0.0606275	7.44601	4.67864	3.29516e-06	3.45823e-05	3.49218	NOT
ATG5	0.0463485	7.19571	4.67655	3.32825e-06	3.49022e-05	3.48262	NOT
TUBGCP2	-0.0633126	8.51232	-4.67543	3.34604e-06	3.50613e-05	3.47752	NOT
SLITRK4	-0.0486359	7.29737	-4.67514	3.35062e-06	3.50649e-05	3.47622	NOT
EXOSC7	0.0574764	7.9683	4.67508	3.35164e-06	3.50649e-05	3.47593	NOT
PIK3R5	-0.0480257	7.42591	-4.67348	3.37734e-06	3.52826e-05	3.46862	NOT
DOCK5	-0.0677278	7.76484	-4.67345	3.37773e-06	3.52826e-05	3.46851	NOT
C19orf6	-0.0760622	8.31023	-4.67235	3.39548e-06	3.54404e-05	3.4635	NOT
CSNK1G2	-0.108216	11.0711	-4.6701	3.43216e-06	3.57952e-05	3.45323	DOWN
WWP1	0.0553106	7.57162	4.66912	3.44815e-06	3.59339e-05	3.44879	NOT
ABCE1	0.0866106	7.63315	4.66748	3.4752e-06	3.61875e-05	3.44132	NOT
C19orf29	-0.0315144	7.30189	-4.66685	3.48557e-06	3.62673e-05	3.43847	NOT
CLEC4A	0.105664	8.963	4.66659	3.48993e-06	3.62844e-05	3.43727	NOT
TOMM70A	0.0647182	8.54009	4.66489	3.51833e-06	3.65512e-05	3.42953	NOT
PCM1	0.0708271	8.73427	4.66428	3.52839e-06	3.66138e-05	3.4268	NOT
NDST2	-0.0552872	8.35561	-4.66406	3.53213e-06	3.66138e-05	3.42579	NOT
CORO1A	-0.0961013	12.0073	-4.66404	3.53257e-06	3.66138e-05	3.42567	NOT
TTC19	0.0682303	8.11792	4.66373	3.53769e-06	3.66384e-05	3.42428	NOT
SORT1	-0.0873322	8.32673	-4.66335	3.54412e-06	3.66765e-05	3.42255	NOT
ZBED1	-0.0726187	9.476	-4.66317	3.54715e-06	3.66795e-05	3.42173	NOT
MLF2	-0.0963548	9.21049	-4.66163	3.57325e-06	3.69208e-05	3.41472	NOT
ATP6V0D1	-0.112884	10.5077	-4.66085	3.58649e-06	3.70116e-05	3.41119	DOWN
KRCC1	0.0863478	7.61546	4.66079	3.58758e-06	3.70116e-05	3.4109	NOT
SLMAP	0.104697	8.36051	4.65808	3.63394e-06	3.7461e-05	3.39863	NOT
SGPL1	-0.0411642	7.47065	-4.65707	3.6515e-06	3.7613e-05	3.39402	NOT
ZFP161	0.0569792	7.92426	4.65563	3.67652e-06	3.78222e-05	3.38749	NOT
MBOAT7	-0.12747	10.5318	-4.65558	3.67747e-06	3.78222e-05	3.38725	DOWN
FCRLA	0.167475	8.42919	4.65425	3.70067e-06	3.80196e-05	3.38124	UP
PREX1	-0.0734949	8.36688	-4.65416	3.70236e-06	3.80196e-05	3.3808	NOT
AVIL	-0.041621	7.31498	-4.6536	3.71208e-06	3.80901e-05	3.37829	NOT
HLA-A	-0.0953731	12.7763	-4.65269	3.72824e-06	3.82266e-05	3.37414	NOT
RUVBL2	-0.0485142	8.02564	-4.65099	3.75844e-06	3.85067e-05	3.36643	NOT
SMARCE1	0.0739119	7.99018	4.65036	3.76959e-06	3.85914e-05	3.3636	NOT
C13orf34	0.0421559	7.3003	4.64986	3.77852e-06	3.86532e-05	3.36134	NOT
PTBP1	-0.0836212	10.7425	-4.64879	3.79783e-06	3.88209e-05	3.35647	NOT
NICN1	-0.0565366	8.30809	-4.64827	3.80724e-06	3.88874e-05	3.3541	NOT
FRAT2	-0.102279	11.8946	-4.64766	3.81818e-06	3.89693e-05	3.35136	NOT
MAN2C1	-0.0685573	7.84013	-4.64704	3.82955e-06	3.90556e-05	3.34852	NOT
XPO5	-0.0424225	7.54792	-4.64638	3.84148e-06	3.91474e-05	3.34555	NOT
DKC1	0.0630961	8.8244	4.64539	3.85947e-06	3.93007e-05	3.34108	NOT
LOXL3	-0.0378698	7.22146	-4.64446	3.87653e-06	3.94394e-05	3.33687	NOT
PBX2	-0.0784212	8.97497	-4.64422	3.88101e-06	3.94394e-05	3.33577	NOT
NACA	0.0971152	12.2354	4.64417	3.88195e-06	3.94394e-05	3.33553	NOT
MRPL46	0.0580032	7.90539	4.64353	3.89365e-06	3.95283e-05	3.33266	NOT
RNPEPL1	-0.0458478	7.52116	-4.64267	3.90967e-06	3.96608e-05	3.32873	NOT
GLT25D1	-0.0737562	9.65996	-4.64232	3.91611e-06	3.96959e-05	3.32716	NOT
TYW3	0.0417485	7.20415	4.6363	4.02921e-06	4.08114e-05	3.29996	NOT
JAK1	-0.118507	9.29604	-4.6351	4.05219e-06	4.10131e-05	3.29453	DOWN
TRIM26	-0.0803722	8.82897	-4.63334	4.08603e-06	4.13243e-05	3.28658	NOT
RIPK1	-0.0598362	8.4556	-4.63294	4.09385e-06	4.1372e-05	3.28475	NOT
TMCO3	-0.0670693	7.92732	-4.6325	4.10231e-06	4.14262e-05	3.28278	NOT
H2AFJ	-0.0830941	8.76852	-4.63013	4.14851e-06	4.18611e-05	3.27208	NOT
SLC22A18AS	-0.0513905	7.34994	-4.62892	4.17228e-06	4.20692e-05	3.26662	NOT
PBXIP1	-0.0543048	7.69369	-4.62866	4.1775e-06	4.20901e-05	3.26543	NOT
SKIV2L2	0.0700935	7.58457	4.62757	4.19898e-06	4.22745e-05	3.26053	NOT
NUDT22	-0.0488232	8.09983	-4.62517	4.24693e-06	4.27103e-05	3.24968	NOT
ATP6V0A1	-0.0958561	9.52573	-4.62508	4.24865e-06	4.27103e-05	3.2493	NOT
STK35	-0.0408922	7.49764	-4.62478	4.25474e-06	4.27394e-05	3.24793	NOT
OMA1	0.057889	7.49862	4.6245	4.26043e-06	4.27643e-05	3.24665	NOT
NDEL1	-0.0898082	11.1782	-4.62297	4.29111e-06	4.30399e-05	3.2398	NOT
MAP3K3	-0.0782012	8.34923	-4.61941	4.36389e-06	4.37371e-05	3.22373	NOT
CMTM7	-0.0772681	10.5057	-4.61743	4.40479e-06	4.41139e-05	3.21482	NOT
ATP5H	0.0787965	10.4203	4.61703	4.41302e-06	4.41633e-05	3.21304	NOT
RELA	-0.0527811	7.72282	-4.61686	4.41675e-06	4.41675e-05	3.21223	NOT
YIPF3	-0.0863775	9.73476	-4.61422	4.47204e-06	4.4687e-05	3.20035	NOT
SYTL1	-0.0722293	8.6173	-4.61248	4.50871e-06	4.50197e-05	3.19255	NOT
FAAH	-0.040171	7.28692	-4.61175	4.52417e-06	4.51404e-05	3.18928	NOT
PGLS	-0.0662725	9.9335	-4.61085	4.54339e-06	4.52983e-05	3.18524	NOT
LCP2	-0.0533783	7.97306	-4.60902	4.58287e-06	4.56578e-05	3.17697	NOT
TCL1A	0.0712864	7.24061	4.6081	4.60259e-06	4.58201e-05	3.17287	NOT
PNPLA2	-0.130734	9.15896	-4.60719	4.62232e-06	4.59823e-05	3.16879	DOWN
C1orf52	0.086087	7.99981	4.60694	4.62778e-06	4.60024e-05	3.16766	NOT
ELMOD2	0.0466015	7.27593	4.60534	4.66275e-06	4.63155e-05	3.16047	NOT
RHOA	-0.0985759	11.7343	-4.60328	4.70812e-06	4.67314e-05	3.15122	NOT
FNTB	-0.0597695	7.88141	-4.60208	4.73482e-06	4.69616e-05	3.14582	NOT
KCNG1	0.0205014	7.00447	4.6008	4.76335e-06	4.72094e-05	3.14009	NOT
TST	-0.101326	10.0061	-4.60019	4.77699e-06	4.73095e-05	3.13736	NOT
FURIN	-0.0967197	8.21874	-4.59981	4.78569e-06	4.73606e-05	3.13562	NOT
SERBP1	0.079881	8.41669	4.59914	4.80071e-06	4.74741e-05	3.13263	NOT
CD300A	-0.0818526	10.1134	-4.59707	4.84757e-06	4.7902e-05	3.12335	NOT
SAMD4B	-0.0616349	7.63154	-4.59582	4.87608e-06	4.81481e-05	3.11776	NOT
ANGEL2	0.100696	8.81821	4.59254	4.95185e-06	4.88361e-05	3.10303	NOT
ST6GALNAC2	-0.0904958	8.45732	-4.59248	4.95306e-06	4.88361e-05	3.1028	NOT
CBS	-0.0975293	7.52396	-4.5914	4.97831e-06	4.90488e-05	3.09795	NOT
C2orf18	-0.0444147	7.59975	-4.58946	5.02373e-06	4.94599e-05	3.08927	NOT
C11orf74	0.0273433	7.03034	4.58925	5.02884e-06	4.94737e-05	3.0883	NOT
ARMC1	0.0688343	7.79153	4.5885	5.04658e-06	4.96117e-05	3.08494	NOT
TMEM14B	0.114744	8.53969	4.58833	5.05052e-06	4.96139e-05	3.0842	UP
RALB	-0.0986446	11.0862	-4.58798	5.0587e-06	4.96422e-05	3.08265	NOT
NSMCE1	0.0660525	8.62004	4.58789	5.06083e-06	4.96422e-05	3.08225	NOT
ROBO3	-0.0365506	7.28129	-4.58655	5.09294e-06	4.99205e-05	3.07621	NOT
TIMM23	0.0611867	8.07414	4.58539	5.12064e-06	5.01552e-05	3.07104	NOT
RTCD1	0.051532	7.6159	4.58452	5.14159e-06	5.03235e-05	3.06714	NOT
CYP4F3	-0.157772	10.3672	-4.58359	5.16393e-06	5.05052e-05	3.063	DOWN
MAP4K5	0.0442134	7.2021	4.58309	5.17606e-06	5.05868e-05	3.06076	NOT
FAM100A	-0.0976408	8.03489	-4.57968	5.25921e-06	5.13619e-05	3.04555	NOT
DCTN2	-0.0471803	9.98559	-4.57812	5.29793e-06	5.17022e-05	3.03854	NOT
SLC12A9	-0.0899767	10.4466	-4.57657	5.33648e-06	5.20405e-05	3.03162	NOT
GNG5	-0.0766509	8.7687	-4.5764	5.3406e-06	5.20427e-05	3.03089	NOT
HEXDC	-0.0590677	7.64302	-4.57536	5.36665e-06	5.22584e-05	3.02624	NOT
INSL3	-0.0470538	7.21847	-4.57476	5.3818e-06	5.23677e-05	3.02355	NOT
GPD1L	0.0681402	8.48274	4.57386	5.40445e-06	5.25499e-05	3.01954	NOT
PIAS1	-0.0791086	9.79169	-4.57269	5.4342e-06	5.28007e-05	3.01431	NOT
ITM2B	-0.0886652	13.1397	-4.57158	5.4624e-06	5.30361e-05	3.00937	NOT
ITGAX	-0.0469193	7.26036	-4.57126	5.4706e-06	5.30772e-05	3.00793	NOT
HIST1H2BK	-0.128025	10.2213	-4.57022	5.49728e-06	5.32973e-05	3.00329	DOWN
LCP1	-0.0781378	13.4102	-4.5699	5.50528e-06	5.33115e-05	3.0019	NOT
RHBDD2	-0.0831435	9.78354	-4.56985	5.50672e-06	5.33115e-05	3.00165	NOT
NPEPL1	-0.0626703	8.15222	-4.56963	5.51244e-06	5.33282e-05	3.00066	NOT
PLXDC2	-0.0869269	8.47383	-4.56804	5.55332e-06	5.36847e-05	2.99361	NOT
NPC2	-0.0770027	12.4823	-4.56788	5.55771e-06	5.36884e-05	2.99286	NOT
OSBPL2	-0.0817604	8.32682	-4.56737	5.57073e-06	5.37752e-05	2.99063	NOT
TFE3	-0.0589809	7.94492	-4.56673	5.5876e-06	5.38992e-05	2.98774	NOT
SH2D2A	-0.0449062	7.40949	-4.56598	5.60698e-06	5.40471e-05	2.98443	NOT
CCDC104	0.0502161	7.28304	4.5656	5.61716e-06	5.41062e-05	2.9827	NOT
HSPA1B	-0.101809	8.7039	-4.56449	5.64628e-06	5.43475e-05	2.97777	NOT
PDE1B	-0.0291992	7.14755	-4.56326	5.67865e-06	5.46197e-05	2.97231	NOT
BRWD1	0.0464406	7.69701	4.56247	5.69975e-06	5.47832e-05	2.96877	NOT
RAN	0.0702369	8.85284	4.56191	5.71464e-06	5.48868e-05	2.96629	NOT
DCUN1D1	-0.0597598	7.59192	-4.56175	5.7188e-06	5.48874e-05	2.96559	NOT
FBXL20	-0.0504061	7.78736	-4.56104	5.73791e-06	5.50312e-05	2.96241	NOT
C13orf27	0.0902213	7.5548	4.55984	5.7699e-06	5.52984e-05	2.9571	NOT
MANSC1	-0.0854461	7.80083	-4.55922	5.78672e-06	5.54198e-05	2.95433	NOT
ZNF322A	0.0550358	7.48385	4.55905	5.79127e-06	5.54236e-05	2.95358	NOT
TERF2IP	0.067735	9.23011	4.5585	5.80605e-06	5.55253e-05	2.95114	NOT
ACTL6A	0.0616218	8.15851	4.55832	5.81099e-06	5.55327e-05	2.95033	NOT
PHF12	-0.0453485	7.76009	-4.55451	5.91517e-06	5.6488e-05	2.93338	NOT
TXNDC12	0.107034	10.0716	4.55242	5.97308e-06	5.70003e-05	2.92408	UP
SNRPA	-0.0492983	8.0861	-4.55175	5.99152e-06	5.71305e-05	2.92114	NOT
CENPQ	0.0191204	6.96062	4.55162	5.99528e-06	5.71305e-05	2.92054	NOT
TRPV2	-0.0705668	8.89448	-4.54903	6.06792e-06	5.77815e-05	2.90905	NOT
DYNLRB1	-0.0965943	9.09474	-4.54787	6.10066e-06	5.80519e-05	2.90392	NOT
SR140	0.0461861	7.89662	4.54541	6.17099e-06	5.86794e-05	2.89298	NOT
TXNDC9	0.0705048	7.18389	4.53973	6.33602e-06	6.01679e-05	2.86781	NOT
ASPRV1	-0.0866985	7.88866	-4.53967	6.33787e-06	6.01679e-05	2.86753	NOT
PACS1	-0.103929	8.64313	-4.53956	6.34105e-06	6.01679e-05	2.86705	NOT
OSGIN1	-0.0218666	7.05549	-4.53686	6.42104e-06	6.08837e-05	2.8551	NOT
NFKB2	-0.0563974	7.80982	-4.53635	6.4362e-06	6.09841e-05	2.85285	NOT
ARSA	-0.0696892	7.77456	-4.53543	6.46371e-06	6.11958e-05	2.84878	NOT
LUZP1	-0.0479701	7.79178	-4.5353	6.4677e-06	6.11958e-05	2.84819	NOT
ZNF540	0.0373108	7.19553	4.53466	6.48696e-06	6.13346e-05	2.84535	NOT
ARL6IP5	0.13431	10.6791	4.53146	6.58393e-06	6.2196e-05	2.8312	UP
TMEM181	0.122183	8.76577	4.53135	6.58738e-06	6.2196e-05	2.8307	UP
SLC15A4	-0.099552	9.98355	-4.52987	6.63258e-06	6.25786e-05	2.82418	NOT
LOC400027	0.0821095	8.1689	4.52894	6.6612e-06	6.27995e-05	2.82007	NOT
PLEKHO2	-0.0922303	9.16219	-4.52881	6.6654e-06	6.27995e-05	2.81947	NOT
CLECL1	0.0697528	7.10278	4.52746	6.70696e-06	6.31466e-05	2.81355	NOT
AP3D1	-0.049838	8.07597	-4.52684	6.72642e-06	6.32852e-05	2.81078	NOT
TNK2	-0.080199	9.88474	-4.52602	6.75203e-06	6.34814e-05	2.80716	NOT
PDCD2	0.0587904	8.1068	4.52552	6.76768e-06	6.35838e-05	2.80495	NOT
NUPL2	0.056702	7.95844	4.5214	6.89793e-06	6.4762e-05	2.78677	NOT
SERTAD2	0.0770059	9.36881	4.52075	6.9187e-06	6.49114e-05	2.78391	NOT
PARL	0.0635146	9.00872	4.5205	6.92673e-06	6.49412e-05	2.7828	NOT
STX7	0.0485016	7.39436	4.51532	7.09465e-06	6.64688e-05	2.75996	NOT
ZNF169	-0.0284078	7.16052	-4.51432	7.12744e-06	6.67292e-05	2.75557	NOT
RG9MTD1	0.0492067	7.14858	4.51361	7.15081e-06	6.69011e-05	2.75244	NOT
HSPA1A	-0.19581	9.66509	-4.5127	7.18112e-06	6.71377e-05	2.74841	DOWN
STAMBPL1	0.09008	7.98585	4.51192	7.20699e-06	6.73324e-05	2.74498	NOT
FAM136A	0.0502678	7.77612	4.51163	7.2167e-06	6.7376e-05	2.7437	NOT
AHSA1	0.0554877	8.38715	4.51068	7.2485e-06	6.76256e-05	2.73951	NOT
BUD31	0.0585012	9.83385	4.51002	7.2706e-06	6.77407e-05	2.73661	NOT
TGFBI	-0.105604	10.7607	-4.51001	7.27097e-06	6.77407e-05	2.73656	NOT
STK40	-0.072286	9.07885	-4.50971	7.28088e-06	6.77858e-05	2.73526	NOT
TUBB2C	-0.0912458	8.87573	-4.50805	7.33687e-06	6.82594e-05	2.72796	NOT
CDV3	0.0884205	9.11692	4.50776	7.34663e-06	6.83027e-05	2.72669	NOT
EMR3	-0.106503	8.64421	-4.50711	7.36871e-06	6.84603e-05	2.72383	DOWN
GDI2	0.118218	9.56862	4.50442	7.46068e-06	6.92666e-05	2.712	UP
LATS2	-0.0397092	7.28811	-4.50396	7.47679e-06	6.9368e-05	2.70995	NOT
C5orf41	-0.127931	9.66343	-4.5031	7.50631e-06	6.95936e-05	2.70619	DOWN
ANAPC4	0.0788175	8.37995	4.50246	7.52871e-06	6.97528e-05	2.70335	NOT
MLL4	-0.0828321	8.72718	-4.50057	7.59458e-06	7.03144e-05	2.69505	NOT
SLC6A6	-0.0590754	7.70866	-4.50036	7.60198e-06	7.03176e-05	2.69412	NOT
BUB3	0.0924732	8.83558	4.50026	7.60545e-06	7.03176e-05	2.69368	NOT
GLOD4	0.0705235	8.2168	4.49716	7.71458e-06	7.12771e-05	2.6801	NOT
VARS	-0.0702717	8.09507	-4.49684	7.72605e-06	7.13338e-05	2.67869	NOT
NADK	-0.106927	9.50386	-4.49421	7.82026e-06	7.21538e-05	2.66714	DOWN
CASP4	0.097866	10.2963	4.49326	7.85453e-06	7.242e-05	2.66297	NOT
MED6	0.0568398	9.15091	4.49307	7.86128e-06	7.24322e-05	2.66215	NOT
ACTB	-0.107489	13.6173	-4.49227	7.89026e-06	7.26491e-05	2.65864	DOWN
OCEL1	-0.0609466	8.76162	-4.49024	7.96439e-06	7.32812e-05	2.64973	NOT
C9orf167	-0.0511606	7.76795	-4.48986	7.97846e-06	7.33223e-05	2.64805	NOT
NRBP1	-0.0410743	7.66725	-4.48977	7.98147e-06	7.33223e-05	2.64769	NOT
SLC22A4	-0.0944384	8.25123	-4.48967	7.98532e-06	7.33223e-05	2.64723	NOT
OAF	-0.0760906	8.24386	-4.48706	8.08177e-06	7.41569e-05	2.63579	NOT
RYK	0.0676564	7.6949	4.48661	8.09852e-06	7.42596e-05	2.63382	NOT
ZNF524	-0.0695944	8.74611	-4.48604	8.11949e-06	7.44008e-05	2.63135	NOT
CHCHD4	0.04579	7.8762	4.48207	8.26909e-06	7.57197e-05	2.61395	NOT
MRFAP1L1	0.0821128	8.10014	4.48188	8.27617e-06	7.57326e-05	2.61314	NOT
CCDC12	0.0585658	9.14952	4.48142	8.29393e-06	7.58432e-05	2.61109	NOT
RASGRP3	0.0730097	7.42565	4.48123	8.30093e-06	7.58553e-05	2.61029	NOT
PTPN23	-0.042969	7.2894	-4.4791	8.38258e-06	7.64693e-05	2.60096	NOT
SP1	-0.0779042	9.07102	-4.47906	8.38413e-06	7.64693e-05	2.60079	NOT
TATDN1	0.0415818	7.44735	4.47903	8.38529e-06	7.64693e-05	2.60066	NOT
GRK6	-0.066502	8.50876	-4.47516	8.53565e-06	7.77874e-05	2.58372	NOT
KIF2A	0.053335	7.81284	4.47491	8.54551e-06	7.77925e-05	2.58262	NOT
TFIP11	-0.0615283	8.74321	-4.47485	8.54786e-06	7.77925e-05	2.58236	NOT
C12orf41	0.0761424	8.69848	4.47443	8.56405e-06	7.78868e-05	2.58056	NOT
METAP1	0.0575673	8.82379	4.47358	8.59753e-06	7.81241e-05	2.57684	NOT
NFAT5	-0.0521673	7.37019	-4.47347	8.60184e-06	7.81241e-05	2.57636	NOT
WDFY2	-0.0560856	8.31994	-4.47182	8.66732e-06	7.86654e-05	2.56914	NOT
TFB1M	0.0431661	7.96825	4.4714	8.68403e-06	7.87635e-05	2.5673	NOT
NUP133	0.0445376	8.21231	4.46768	8.83315e-06	8.00617e-05	2.55108	NOT
NCBP1	0.0397455	8.16926	4.46462	8.95794e-06	8.11377e-05	2.53772	NOT
RAF1	-0.0774561	9.62069	-4.46268	9.03774e-06	8.1805e-05	2.52927	NOT
RPL28	-0.0472943	7.56466	-4.46162	9.08169e-06	8.21472e-05	2.52465	NOT
ELL	-0.0744443	8.4521	-4.45761	9.24963e-06	8.36096e-05	2.5072	NOT
C2orf29	0.0639607	9.61711	4.45599	9.31851e-06	8.41753e-05	2.50013	NOT
NUDT3	0.0522802	8.72947	4.45288	9.45154e-06	8.53193e-05	2.48663	NOT
MRPS7	0.045047	7.79189	4.45061	9.55e-06	8.61499e-05	2.47676	NOT
TNFRSF10B	-0.120494	9.25598	-4.44945	9.60062e-06	8.65439e-05	2.47173	DOWN
CD300LB	-0.0651201	7.94212	-4.44932	9.60663e-06	8.65439e-05	2.47113	NOT
COPG	-0.0560196	8.18612	-4.44886	9.62648e-06	8.66643e-05	2.46916	NOT
FSCN1	-0.074431	8.2716	-4.4485	9.64257e-06	8.66916e-05	2.46758	NOT
NUCB1	-0.0977161	12.2268	-4.44847	9.64377e-06	8.66916e-05	2.46746	NOT
RAVER1	-0.0625894	7.91496	-4.44831	9.6508e-06	8.66916e-05	2.46676	NOT
EDEM2	-0.0479854	8.60309	-4.4482	9.65547e-06	8.66916e-05	2.4663	NOT
ZNF467	-0.130161	10.1756	-4.44475	9.80901e-06	8.8011e-05	2.45128	DOWN
NOL12	-0.0613147	8.97007	-4.44426	9.83071e-06	8.81465e-05	2.44917	NOT
IL2RG	-0.0546301	7.71513	-4.44073	9.99017e-06	8.94631e-05	2.43385	NOT
SLC15A3	-0.108191	10.4371	-4.44071	9.99094e-06	8.94631e-05	2.43378	DOWN
TRIM8	-0.0749568	9.99482	-4.44025	1.00118e-05	8.95899e-05	2.43179	NOT
NPC1	-0.0585886	7.98576	-4.43815	1.01083e-05	9.03927e-05	2.42266	NOT
NMNAT1	-0.0289599	7.23298	-4.4353	1.02401e-05	9.15105e-05	2.41032	NOT
RAB3D	-0.0478594	7.35287	-4.43485	1.02612e-05	9.16298e-05	2.40837	NOT
GPR84	-0.0404569	7.22608	-4.43472	1.02672e-05	9.16298e-05	2.40781	NOT
LASS2	-0.0515307	8.87081	-4.4312	1.04327e-05	9.30444e-05	2.39259	NOT
NFAM1	-0.0410203	7.28041	-4.42834	1.05694e-05	9.42005e-05	2.3802	NOT
CHIC2	-0.0751213	9.95199	-4.42601	1.06821e-05	9.51418e-05	2.3701	NOT
CNOT3	-0.0597931	7.68858	-4.42546	1.07084e-05	9.53126e-05	2.36776	NOT
RLF	0.0393537	7.39918	4.42381	1.07891e-05	9.59673e-05	2.36061	NOT
RPL34	0.0736694	7.29254	4.42264	1.08467e-05	9.64149e-05	2.35554	NOT
HLA-DOB	0.115201	8.19487	4.42171	1.08922e-05	9.67552e-05	2.35156	UP
ACTR1A	-0.0707872	9.0243	-4.41913	1.10207e-05	9.78319e-05	2.34039	NOT
C16orf63	0.0842889	8.06675	4.41545	1.12058e-05	9.94091e-05	2.32454	NOT
HTRA2	-0.0493761	7.6444	-4.4142	1.127e-05	9.98519e-05	2.31911	NOT
ORAI2	-0.0456063	7.30237	-4.41418	1.12707e-05	9.98519e-05	2.31905	NOT
RNF166	-0.0604911	8.072	-4.41314	1.13242e-05	0.000100259	2.31454	NOT
ATG7	-0.0787304	8.73737	-4.41021	1.14753e-05	0.00010153	2.30193	NOT
SEPX1	-0.092193	12.8625	-4.40787	1.15972e-05	0.00010254	2.29187	NOT
KTELC1	0.0544793	7.67911	4.40643	1.16734e-05	0.000103145	2.28564	NOT
SIGLEC5	-0.104965	7.99066	-4.40532	1.17322e-05	0.000103597	2.28085	NOT
NTNG2	-0.0401778	7.18215	-4.40465	1.17674e-05	0.000103839	2.27801	NOT
GPAA1	-0.0595011	8.31997	-4.40426	1.17882e-05	0.000103954	2.27633	NOT
ZNHIT3	0.102259	8.05223	4.40388	1.18086e-05	0.000104065	2.27468	NOT
CD93	-0.115439	10.2261	-4.40342	1.18334e-05	0.000104215	2.27269	DOWN
NKRF	0.0452979	7.42092	4.4008	1.19744e-05	0.000105388	2.26141	NOT
TMEM41B	0.0851732	8.40237	4.40063	1.19832e-05	0.000105396	2.26071	NOT
C2orf49	0.0435672	7.31105	4.40025	1.20042e-05	0.000105511	2.25905	NOT
C16orf70	-0.0378488	7.33975	-4.39966	1.20359e-05	0.000105719	2.25654	NOT
DBNL	-0.0756787	11.1265	-4.39849	1.20998e-05	0.000106211	2.2515	NOT
FCER2	0.118265	7.69473	4.39783	1.21359e-05	0.000106458	2.24867	UP
IFT74	0.0355876	7.06387	4.39735	1.21621e-05	0.000106618	2.24662	NOT
METTL10	0.0246521	7.09466	4.39583	1.2246e-05	0.000107283	2.24007	NOT
C12orf24	0.0358091	7.30976	4.39542	1.2269e-05	0.000107414	2.23829	NOT
CAPN1	-0.0847317	9.38243	-4.39496	1.22944e-05	0.000107566	2.23632	NOT
KIAA0040	-0.0536297	7.73964	-4.39412	1.23407e-05	0.000107864	2.23274	NOT
FLT3	-0.0182832	7.02913	-4.39405	1.23446e-05	0.000107864	2.23245	NOT
ZNF559	0.0556883	7.63273	4.39309	1.23984e-05	0.000108263	2.22831	NOT
NET1	0.0350286	7.19821	4.39224	1.24462e-05	0.000108545	2.22465	NOT
AHCYL1	-0.0745039	9.44914	-4.39223	1.24469e-05	0.000108545	2.2246	NOT
AP2A2	-0.0388441	7.5176	-4.39012	1.25658e-05	0.000109511	2.21555	NOT
ANKRD49	0.101947	7.96896	4.38974	1.25875e-05	0.000109625	2.21391	NOT
ZNF544	0.0527249	8.09915	4.3896	1.25954e-05	0.000109625	2.21331	NOT
PTPRA	-0.0465195	7.59627	-4.3868	1.27549e-05	0.000110941	2.20134	NOT
VPS26A	0.0877663	9.10507	4.38496	1.28614e-05	0.000111762	2.19343	NOT
NAGA	-0.047411	7.36415	-4.38488	1.2866e-05	0.000111762	2.19309	NOT
RPS6KA4	-0.0617208	8.55768	-4.38332	1.29568e-05	0.000112477	2.18641	NOT
NDUFA9	0.0570893	8.43181	4.38252	1.30035e-05	0.00011281	2.18298	NOT
HAT1	0.0698801	7.33771	4.38167	1.30532e-05	0.000113103	2.17936	NOT
NDUFV2	0.0800865	9.3453	4.38165	1.30542e-05	0.000113103	2.17928	NOT
CCDC45	0.0590899	8.17708	4.37995	1.31549e-05	0.000113901	2.17198	NOT
CLIC3	-0.128848	8.67323	-4.3781	1.32647e-05	0.000114777	2.16407	DOWN
CYB561D2	-0.045511	8.62192	-4.37788	1.32776e-05	0.000114815	2.16314	NOT
CLEC2D	0.104219	8.9339	4.37681	1.33418e-05	0.000115296	2.15855	NOT
CASP1	0.0877966	9.13023	4.37601	1.33901e-05	0.000115638	2.15512	NOT
SH3TC1	-0.0612743	7.83749	-4.37531	1.34323e-05	0.000115927	2.15213	NOT
FOLR2	-0.0425366	7.30276	-4.37353	1.35399e-05	0.00011678	2.14454	NOT
PRKRIR	0.12365	8.83649	4.37268	1.35917e-05	0.000117151	2.14091	UP
CSGALNACT2	-0.0554613	7.67254	-4.3707	1.37135e-05	0.000118125	2.13243	NOT
NT5C2	-0.0802914	9.90967	-4.37034	1.37355e-05	0.000118239	2.1309	NOT
TAF1B	0.0375463	7.29006	4.36849	1.38504e-05	0.0001191	2.12298	NOT
C1orf131	0.0688306	8.07539	4.36844	1.38534e-05	0.0001191	2.12277	NOT
RSRC1	0.0449361	7.24086	4.36748	1.39133e-05	0.000119538	2.11867	NOT
TK2	-0.0385043	7.56811	-4.36572	1.40235e-05	0.000120383	2.11117	NOT
CUL2	0.0531478	8.16466	4.36562	1.40296e-05	0.000120383	2.11076	NOT
SLC19A1	-0.0785955	8.2334	-4.36413	1.41238e-05	0.000121104	2.1044	NOT
C11orf68	-0.0580343	8.07383	-4.364	1.41318e-05	0.000121104	2.10386	NOT
RECQL	0.0600668	7.60344	4.36246	1.42297e-05	0.000121821	2.09729	NOT
TFAM	0.0864516	8.06736	4.3624	1.42337e-05	0.000121821	2.09702	NOT
TNFRSF1B	-0.101103	10.8534	-4.36173	1.42769e-05	0.000122079	2.09414	NOT
RELL2	-0.0305997	7.34226	-4.36164	1.42821e-05	0.000122079	2.0938	NOT
PDCD4	0.0498362	7.67899	4.36027	1.43702e-05	0.000122753	2.08795	NOT
ZFPM1	-0.0662188	8.31293	-4.35992	1.43932e-05	0.000122871	2.08643	NOT
RASSF2	-0.106205	11.1859	-4.3591	1.44462e-05	0.000123245	2.08293	DOWN
PDPK1	-0.0493192	7.58394	-4.35519	1.47011e-05	0.00012534	2.06631	NOT
DIP2B	-0.0544902	8.21036	-4.35373	1.47977e-05	0.000126082	2.06008	NOT
SAP30BP	-0.032652	7.46373	-4.35322	1.48313e-05	0.000126288	2.05793	NOT
SPHK2	-0.0530345	8.56711	-4.35216	1.49021e-05	0.00012681	2.0534	NOT
POLR2B	0.0625209	8.34378	4.35178	1.49272e-05	0.000126941	2.0518	NOT
TAP1	-0.100232	10.8934	-4.35164	1.49365e-05	0.000126941	2.05121	NOT
WWC3	-0.0701373	8.4455	-4.35145	1.49495e-05	0.000126971	2.05038	NOT
TLR2	-0.0664655	7.57624	-4.34901	1.51134e-05	0.00012822	2.04002	NOT
GLUD1	0.0702948	9.52785	4.34898	1.51157e-05	0.00012822	2.03987	NOT
C9orf78	0.131572	10.671	4.34879	1.51282e-05	0.000128244	2.03909	UP
LIN37	-0.0393002	7.33861	-4.34842	1.51532e-05	0.000128375	2.03751	NOT
COQ3	0.0301691	7.35794	4.34707	1.52453e-05	0.000129073	2.03176	NOT
EXOSC4	-0.0468993	7.53683	-4.34623	1.53027e-05	0.000129477	2.02818	NOT
MARK2	-0.0765984	7.86278	-4.34573	1.53369e-05	0.000129684	2.02606	NOT
C20orf30	0.0845023	9.89275	4.34287	1.55339e-05	0.000131267	2.01393	NOT
RHOT2	-0.0596482	8.57043	-4.34241	1.5566e-05	0.0001314	2.01197	NOT
LLGL1	-0.0545289	8.02985	-4.34236	1.55693e-05	0.0001314	2.01177	NOT
NOL8	0.0647592	8.31933	4.34201	1.5594e-05	0.000131525	2.01027	NOT
CFL1	-0.0881516	12.0782	-4.33883	1.58166e-05	0.000133318	1.99679	NOT
AKR1C3	0.127999	8.01454	4.33777	1.58913e-05	0.000133864	1.99232	UP
KIR2DL4	-0.130525	8.05527	-4.33731	1.59244e-05	0.000134058	1.99034	DOWN
ARFGAP1	-0.041441	7.4991	-4.33705	1.59425e-05	0.000134126	1.98926	NOT
FAM131A	-0.0483404	7.6927	-4.33673	1.59659e-05	0.000134238	1.98786	NOT
SNX4	0.0600251	7.22616	4.33392	1.61671e-05	0.000135844	1.97597	NOT
RWDD4A	0.0578501	7.52827	4.33341	1.6204e-05	0.000136069	1.9738	NOT
OXER1	-0.0535007	7.45656	-4.33227	1.62863e-05	0.000136674	1.96898	NOT
C2orf64	0.0760535	8.27455	4.32822	1.65828e-05	0.000139075	1.95184	NOT
AP1M1	-0.08257	9.6398	-4.32748	1.66377e-05	0.000139404	1.9487	NOT
ZC3H4	-0.0642885	8.89346	-4.32741	1.6643e-05	0.000139404	1.9484	NOT
PUSL1	-0.0356448	7.26235	-4.32645	1.67141e-05	0.000139912	1.94435	NOT
C20orf11	0.0529319	8.95856	4.32383	1.69104e-05	0.000141467	1.93326	NOT
ZDHHC6	0.056502	8.47236	4.32297	1.69748e-05	0.00014189	1.92964	NOT
FCGR2A	-0.100426	11.8858	-4.32287	1.69822e-05	0.00014189	1.92923	NOT
CSRP2BP	0.049732	7.40891	4.32236	1.70209e-05	0.000142124	1.92707	NOT
CEACAM4	-0.059121	7.57401	-4.32129	1.71024e-05	0.000142716	1.92253	NOT
CORO2A	-0.0369745	7.36558	-4.32092	1.71303e-05	0.000142859	1.92098	NOT
KLHDC5	0.0603439	7.77002	4.31961	1.72304e-05	0.000143604	1.91545	NOT
HIST1H3H	-0.0942641	7.7253	-4.31821	1.73378e-05	0.000144357	1.90955	NOT
FAM126B	-0.0614098	8.05235	-4.31815	1.73422e-05	0.000144357	1.9093	NOT
RCN3	-0.0535882	7.54541	-4.31784	1.73667e-05	0.00014447	1.90796	NOT
SGSH	-0.0710707	8.86602	-4.31682	1.74455e-05	0.000145036	1.90366	NOT
DVL2	-0.0392396	7.4732	-4.31591	1.75157e-05	0.000145528	1.89985	NOT
GLMN	0.0308417	7.15497	4.31547	1.75505e-05	0.000145727	1.89796	NOT
PRPF38A	0.033659	7.39529	4.31268	1.77695e-05	0.000147453	1.88618	NOT
UFM1	0.0592409	7.473	4.31229	1.78001e-05	0.000147616	1.88455	NOT
MTMR3	-0.0489106	7.31058	-4.31179	1.78396e-05	0.000147852	1.88244	NOT
UBA7	-0.0774958	9.51896	-4.31157	1.78567e-05	0.000147902	1.88153	NOT
IER3	-0.0895179	8.30321	-4.31075	1.79216e-05	0.000148348	1.87809	NOT
EIF3D	0.0643499	10.3667	4.31021	1.79653e-05	0.000148617	1.87578	NOT
ACD	-0.0560923	8.02445	-4.30942	1.80283e-05	0.000149046	1.87245	NOT
C1QB	-0.0693511	7.24204	-4.309	1.80621e-05	0.000149232	1.87067	NOT
UBE2C	-0.0305964	7.14525	-4.30886	1.80732e-05	0.000149232	1.87009	NOT
C9orf142	-0.0806013	9.81333	-4.30762	1.81723e-05	0.000149958	1.86489	NOT
CD63	-0.0690741	9.29508	-4.30632	1.8278e-05	0.000150737	1.85939	NOT
IBTK	0.0715114	7.37903	4.30595	1.83076e-05	0.000150888	1.85785	NOT
COMMD1	0.0601316	8.93639	4.3034	1.8516e-05	0.000152511	1.8471	NOT
FXYD6	-0.0439899	7.25245	-4.30302	1.85468e-05	0.000152671	1.84552	NOT
C1GALT1C1	0.040252	7.31257	4.30018	1.87818e-05	0.00015451	1.83356	NOT
PIGA	0.071769	7.738	4.29959	1.88307e-05	0.000154818	1.83109	NOT
MOV10	-0.0663846	7.91107	-4.29936	1.88498e-05	0.000154879	1.83013	NOT
C14orf129	0.066576	7.46031	4.29775	1.89852e-05	0.000155895	1.82334	NOT
CTSW	-0.120188	8.94298	-4.29759	1.89985e-05	0.000155909	1.82267	DOWN
MED20	0.0558064	8.19493	4.2968	1.9065e-05	0.000156359	1.81935	NOT
NF1	-0.0314541	7.27887	-4.29662	1.90797e-05	0.000156383	1.81862	NOT
ECE1	-0.0454078	7.30149	-4.29165	1.95043e-05	0.000159766	1.79772	NOT
FNBP1	-0.0771435	11.1034	-4.28837	1.97889e-05	0.000161997	1.78397	NOT
ATG9A	-0.0694449	8.28997	-4.28763	1.98537e-05	0.000162428	1.78087	NOT
BNIP2	0.113428	8.81421	4.28714	1.9897e-05	0.000162683	1.7788	UP
CAPZB	-0.0721022	10.526	-4.28689	1.99187e-05	0.00016276	1.77777	NOT
SH2D3C	-0.0645536	8.40824	-4.28637	1.99649e-05	0.000163038	1.77557	NOT
DHX33	-0.039426	7.74499	-4.28593	2.00034e-05	0.000163253	1.77374	NOT
LARP1	-0.0503779	7.78945	-4.28509	2.0078e-05	0.000163646	1.7702	NOT
ZMYM1	0.0525595	7.40661	4.28499	2.00862e-05	0.000163646	1.76981	NOT
SMAD7	-0.0381658	7.43196	-4.28497	2.00883e-05	0.000163646	1.76971	NOT
ORC4L	0.0248821	7.10234	4.28464	2.01174e-05	0.000163784	1.76834	NOT
COMTD1	-0.0438293	7.6384	-4.28385	2.01877e-05	0.000164256	1.76503	NOT
GPR77	-0.0379672	7.28064	-4.28267	2.02934e-05	0.000165015	1.76007	NOT
LOC646567	0.0741786	8.36647	4.28229	2.03268e-05	0.000165186	1.75851	NOT
VPS26B	-0.034819	7.66127	-4.28196	2.03564e-05	0.000165326	1.75713	NOT
NELL2	0.108641	8.52895	4.28124	2.04216e-05	0.000165755	1.75409	UP
KIFC2	-0.049238	7.68094	-4.27692	2.08144e-05	0.000168841	1.73601	NOT
EXT1	-0.0420506	7.54164	-4.27663	2.08408e-05	0.000168952	1.73481	NOT
HDAC3	-0.0442483	8.92842	-4.27543	2.0951e-05	0.000169743	1.7298	NOT
GLYCTK	-0.0375983	7.56229	-4.27434	2.10526e-05	0.000170462	1.72521	NOT
TBL3	-0.036761	7.31315	-4.27408	2.10764e-05	0.000170552	1.72414	NOT
CD226	0.0530023	7.29347	4.27337	2.11424e-05	0.000170982	1.72117	NOT
SIRPD	-0.0407007	7.50453	-4.27193	2.12774e-05	0.00017197	1.71513	NOT
MICALL1	-0.0381329	7.21461	-4.27082	2.13816e-05	0.000172625	1.7105	NOT
RAB32	-0.0761646	9.54955	-4.27079	2.13842e-05	0.000172625	1.71038	NOT
C19orf52	-0.0395481	7.69754	-4.27056	2.14053e-05	0.00017269	1.70944	NOT
PTPN11	0.0777379	8.24915	4.26995	2.1463e-05	0.000173051	1.70689	NOT
C14orf19	0.0322067	7.06876	4.26946	2.15098e-05	0.000173324	1.70482	NOT
UBE2T	0.024307	7.09252	4.26869	2.15826e-05	0.000173805	1.70162	NOT
ASGR2	-0.0672362	7.62036	-4.267	2.17437e-05	0.000174997	1.69456	NOT
C1orf156	0.0193034	6.99717	4.26653	2.17887e-05	0.000175254	1.69259	NOT
ARMCX6	0.0570179	7.7459	4.26573	2.18653e-05	0.000175764	1.68927	NOT
NGRN	0.0503392	8.46397	4.26558	2.18801e-05	0.000175777	1.68862	NOT
NARFL	-0.0350951	7.54567	-4.26436	2.19976e-05	0.000176615	1.68354	NOT
MRPL15	0.0666045	7.50541	4.26285	2.21443e-05	0.000177686	1.67724	NOT
TRABD	-0.070124	10.9642	-4.26267	2.21618e-05	0.00017772	1.67648	NOT
ELAC2	-0.0426005	7.44529	-4.26132	2.22932e-05	0.000178667	1.67087	NOT
EFCAB4A	-0.0379055	7.27575	-4.26077	2.23473e-05	0.000178891	1.66858	NOT
PEX14	-0.0412858	7.45403	-4.26076	2.2348e-05	0.000178891	1.66854	NOT
AMT	-0.0485652	7.70444	-4.26016	2.24074e-05	0.000179259	1.66603	NOT
LILRB1	-0.039069	7.23262	-4.25916	2.25059e-05	0.000179939	1.66187	NOT
PLOD3	-0.0628737	8.31792	-4.25822	2.25993e-05	0.000180578	1.65794	NOT
GLT1D1	-0.0595742	7.67236	-4.25679	2.27415e-05	0.000181606	1.65199	NOT
PIP4K2C	-0.0371538	7.6995	-4.25648	2.27726e-05	0.000181746	1.65069	NOT
RABEPK	0.048836	8.94751	4.25409	2.30121e-05	0.000183485	1.64076	NOT
HCFC1R1	-0.0689138	9.0338	-4.25403	2.30181e-05	0.000183485	1.64052	NOT
GNB4	0.0418609	7.22191	4.25304	2.31187e-05	0.000184177	1.63638	NOT
GHRL	-0.0578001	7.56097	-4.25238	2.31851e-05	0.000184597	1.63366	NOT
NRM	-0.0423157	7.51255	-4.25139	2.32865e-05	0.000185293	1.62952	NOT
UBE2N	0.0904634	8.44679	4.25071	2.33556e-05	0.000185733	1.62671	NOT
RFX2	-0.0548988	7.29895	-4.25022	2.34064e-05	0.000186026	1.62464	NOT
PRCC	-0.0442298	7.85311	-4.24826	2.36074e-05	0.000187512	1.61653	NOT
UTP11L	0.0482347	7.90133	4.24665	2.37745e-05	0.000188673	1.60984	NOT
DPEP3	-0.0782869	7.99496	-4.24658	2.37819e-05	0.000188673	1.60955	NOT
TMEM173	-0.0711682	9.45912	-4.2463	2.38113e-05	0.000188795	1.60838	NOT
CUTC	0.0690858	8.01947	4.24595	2.38483e-05	0.000188976	1.60691	NOT
TAX1BP3	-0.0717339	8.77355	-4.2446	2.39897e-05	0.000189983	1.6013	NOT
NFE2L1	-0.0470071	7.91284	-4.24191	2.42736e-05	0.000192118	1.59014	NOT
HIST2H2BE	-0.0979221	8.76608	-4.23955	2.45255e-05	0.000193997	1.58035	NOT
BRSK1	-0.0960149	8.70234	-4.2387	2.46171e-05	0.000194546	1.57681	NOT
CSK	-0.0773859	11.1363	-4.23863	2.46241e-05	0.000194546	1.57654	NOT
CAPN3	-0.0323311	7.30267	-4.23812	2.46793e-05	0.000194868	1.57442	NOT
GPATCH3	-0.0344135	7.69396	-4.23696	2.48049e-05	0.000195744	1.5696	NOT
SMAP2	-0.104007	11.5504	-4.23672	2.48307e-05	0.000195832	1.56862	NOT
PHF2	-0.0481496	8.30304	-4.23656	2.48476e-05	0.000195849	1.56797	NOT
TM9SF4	-0.0600595	8.74149	-4.23515	2.5002e-05	0.00019695	1.5621	NOT
SLC2A3	-0.0989026	12.0386	-4.23386	2.51425e-05	0.00019794	1.55679	NOT
DOCK11	0.108652	9.39114	4.23275	2.5265e-05	0.000198787	1.55217	UP
KLHDC2	0.0898206	8.32115	4.23224	2.5322e-05	0.000199119	1.55004	NOT
C9orf80	0.0877281	9.96257	4.2307	2.54929e-05	0.000200344	1.54366	NOT
C19orf61	-0.0393632	7.48522	-4.22991	2.55809e-05	0.000200917	1.54039	NOT
LEPRE1	-0.0335932	7.55292	-4.22935	2.56431e-05	0.000201288	1.53809	NOT
RPL13A	0.106049	11.2175	4.22914	2.56669e-05	0.000201356	1.53721	UP
SHC1	-0.0304382	7.66257	-4.22895	2.56874e-05	0.000201399	1.53645	NOT
BCDIN3D	0.0476412	7.95562	4.2256	2.60655e-05	0.000204244	1.5226	NOT
SQRDL	-0.0642771	8.26628	-4.22447	2.61948e-05	0.000205136	1.51791	NOT
LAT2	-0.0640942	8.57578	-4.22422	2.62236e-05	0.000205152	1.51686	NOT
C11orf48	0.0635008	8.73436	4.22418	2.62275e-05	0.000205152	1.51673	NOT
DHTKD1	-0.0386749	7.53905	-4.22361	2.62931e-05	0.000205545	1.51435	NOT
NMT2	0.0559987	7.78735	4.22269	2.63989e-05	0.000206251	1.51055	NOT
THNSL1	0.0330155	7.18989	4.22052	2.66498e-05	0.000208089	1.50158	NOT
VENTX	-0.0637469	7.80084	-4.2173	2.70254e-05	0.000210899	1.48831	NOT
SIRPB1	-0.0791633	7.99465	-4.21713	2.70455e-05	0.00021093	1.48761	NOT
ZNF789	0.0344708	7.37557	4.217	2.7061e-05	0.00021093	1.48707	NOT
UBP1	0.0704938	8.76473	4.21548	2.72404e-05	0.000212205	1.4808	NOT
COX19	-0.0674344	9.28196	-4.21498	2.72997e-05	0.000212543	1.47874	NOT
LENG8	-0.043355	7.38508	-4.21479	2.73222e-05	0.000212595	1.47796	NOT
SLC6A12	-0.0465776	7.40464	-4.21252	2.75935e-05	0.00021458	1.46859	NOT
STARD3	-0.0448794	7.85073	-4.21169	2.76943e-05	0.000215239	1.46514	NOT
ADCK5	-0.0261295	7.20891	-4.21112	2.77621e-05	0.000215641	1.46282	NOT
POLM	-0.0452265	7.78441	-4.21039	2.78507e-05	0.000216203	1.4598	NOT
IL6R	-0.0866729	8.18889	-4.21004	2.78925e-05	0.000216365	1.45838	NOT
LILRB4	-0.0415933	7.37609	-4.20995	2.7904e-05	0.000216365	1.45799	NOT
FAS	0.0317591	7.1551	4.20952	2.79557e-05	0.00021664	1.45623	NOT
C20orf111	0.0675615	9.85718	4.20779	2.81671e-05	0.000218056	1.44909	NOT
GZMA	0.191949	10.0149	4.20776	2.8171e-05	0.000218056	1.44896	UP
C14orf102	-0.0449897	8.3976	-4.20758	2.81931e-05	0.000218101	1.44822	NOT
WDR1	-0.103846	8.52948	-4.20734	2.82217e-05	0.000218176	1.44726	NOT
HLX	-0.0926894	8.36595	-4.20723	2.82355e-05	0.000218176	1.4468	NOT
THOC3	0.0533201	7.55435	4.20703	2.82605e-05	0.000218243	1.44595	NOT
CMPK1	0.113874	8.04135	4.20684	2.82842e-05	0.0002183	1.44516	UP
HRSP12	0.0213268	7.00749	4.2056	2.84361e-05	0.000219322	1.44009	NOT
NEDD8	0.0479866	10.0263	4.20549	2.84494e-05	0.000219322	1.43964	NOT
CEP164	-0.0379284	7.52147	-4.20447	2.85761e-05	0.000220171	1.43543	NOT
TUT1	-0.0416165	7.43403	-4.20425	2.86032e-05	0.000220253	1.43453	NOT
HIST1H4C	0.14185	11.6299	4.20305	2.87535e-05	0.000221283	1.42957	UP
ARHGAP30	-0.0776687	9.69939	-4.20133	2.89679e-05	0.000222804	1.42253	NOT
LRPPRC	0.0380995	7.76224	4.19906	2.92545e-05	0.000224879	1.4132	NOT
DOM3Z	-0.0423493	7.60447	-4.19825	2.93581e-05	0.000225546	1.40985	NOT
RBM33	-0.0482604	8.3904	-4.198	2.93899e-05	0.00022566	1.40882	NOT
API5	0.0779671	8.57214	4.19782	2.94121e-05	0.000225701	1.4081	NOT
ZNF668	-0.0419097	7.7216	-4.19654	2.9576e-05	0.000226828	1.40284	NOT
TBK1	0.0861493	8.36568	4.19638	2.95976e-05	0.000226864	1.40215	NOT
RRAGC	-0.0626371	8.72551	-4.19526	2.97414e-05	0.000227835	1.39756	NOT
TMEM9B	0.0629117	9.14805	4.19318	3.00108e-05	0.000229768	1.38901	NOT
RABAC1	-0.0635277	9.51023	-4.19086	3.0313e-05	0.000231948	1.37952	NOT
CLDND1	0.095366	8.68185	4.19036	3.03787e-05	0.000232318	1.37747	NOT
PTRH2	0.0452574	7.69944	4.18884	3.05795e-05	0.000233711	1.37123	NOT
SLC29A3	-0.0347216	7.39562	-4.18872	3.05958e-05	0.000233711	1.37072	NOT
RBM17	0.0685001	8.37575	4.18647	3.0894e-05	0.000235854	1.36153	NOT
CYB5A	0.0467468	7.93016	4.18567	3.1002e-05	0.000236543	1.35823	NOT
VAMP2	-0.0741702	9.38931	-4.17969	3.18133e-05	0.000242595	1.33376	NOT
PNPLA6	-0.0737695	9.59263	-4.17922	3.18783e-05	0.000242952	1.33182	NOT
ZFYVE26	-0.0481773	8.44223	-4.17586	3.23436e-05	0.000246357	1.3181	NOT
RNF135	-0.0523081	7.97035	-4.17347	3.26793e-05	0.000248773	1.30832	NOT
ARHGAP26	-0.0560863	7.4219	-4.17215	3.28661e-05	0.000250051	1.30292	NOT
DTWD1	0.023735	7.07923	4.17174	3.29243e-05	0.000250352	1.30124	NOT
AIM2	0.0588769	7.49144	4.17051	3.30995e-05	0.000251541	1.29622	NOT
IL16	-0.0532352	8.55579	-4.16668	3.36505e-05	0.000255583	1.28059	NOT
COTL1	-0.085406	9.36834	-4.16646	3.3681e-05	0.00025567	1.27973	NOT
COL9A2	-0.0649288	7.54544	-4.16556	3.38125e-05	0.000256522	1.27604	NOT
RAB21	0.0680893	8.06486	4.16527	3.38554e-05	0.000256579	1.27483	NOT
IPO13	-0.0377665	7.59347	-4.16519	3.38669e-05	0.000256579	1.27451	NOT
CCDC69	-0.0525654	7.90832	-4.16511	3.38777e-05	0.000256579	1.27421	NOT
CYP4V2	0.0791383	7.89695	4.16325	3.41504e-05	0.000258498	1.26662	NOT
PACSIN2	-0.0832624	10.5197	-4.16221	3.4304e-05	0.000259514	1.26237	NOT
PCNP	0.135738	9.25653	4.16195	3.43427e-05	0.000259659	1.2613	UP
RP9	0.0499558	7.86659	4.16147	3.44134e-05	0.000260047	1.25936	NOT
KIAA0427	-0.0308178	7.25777	-4.16096	3.44886e-05	0.000260468	1.25729	NOT
VEZT	0.0499598	7.72294	4.15961	3.469e-05	0.000261841	1.25178	NOT
CLDND2	-0.0902986	7.89778	-4.15742	3.50173e-05	0.000264162	1.24289	NOT
RSRC2	0.0829055	8.48453	4.15681	3.51104e-05	0.000264715	1.24037	NOT
CSE1L	0.056703	8.4126	4.15633	3.51817e-05	0.000265103	1.23845	NOT
EPHB6	-0.0522015	7.52159	-4.15372	3.55786e-05	0.000267943	1.22783	NOT
C16orf53	0.0450991	7.99074	4.14762	3.65225e-05	0.000274896	1.20305	NOT
ARHGAP11A	0.0306583	7.12735	4.14688	3.66391e-05	0.000275618	1.20003	NOT
MUSTN1	-0.0357153	7.27354	-4.14621	3.6745e-05	0.00027626	1.1973	NOT
CADM4	-0.0252109	7.05327	-4.14583	3.6804e-05	0.000276548	1.19578	NOT
MLLT1	-0.0151124	7.01333	-4.14293	3.72657e-05	0.000279859	1.18398	NOT
R3HDM2	-0.0291813	7.3821	-4.14156	3.74851e-05	0.000281349	1.17842	NOT
PRKCSH	-0.0594308	8.68078	-4.14142	3.75077e-05	0.000281361	1.17785	NOT
POLR3C	0.0462847	8.56589	4.14028	3.76903e-05	0.000282572	1.17326	NOT
FKBP5	-0.111471	9.93968	-4.13942	3.78294e-05	0.000283455	1.16977	DOWN
FARSA	-0.0369644	7.4572	-4.13754	3.8136e-05	0.000285592	1.16213	NOT
MAP3K6	-0.0361141	7.43451	-4.13597	3.83932e-05	0.000287357	1.15577	NOT
VHL	-0.0936653	9.08724	-4.13518	3.8523e-05	0.000288168	1.15258	NOT
F12	-0.037989	7.37991	-4.13063	3.92797e-05	0.000293663	1.13417	NOT
MAN2B1	-0.0719593	8.575	-4.13018	3.93563e-05	0.000294071	1.13233	NOT
RPS6KA3	0.0620455	7.48753	4.12966	3.94423e-05	0.000294549	1.13026	NOT
ZNF775	-0.0266378	7.20925	-4.12837	3.96614e-05	0.000295996	1.12502	NOT
LOC728564	0.0381292	7.66564	4.12826	3.96803e-05	0.000295996	1.12457	NOT
ARSG	-0.0548291	7.95935	-4.12792	3.97374e-05	0.000296257	1.12321	NOT
STARD10	-0.0720911	8.21566	-4.12718	3.98638e-05	0.000297033	1.12021	NOT
BLCAP	0.0414102	8.43028	4.12629	4.00149e-05	0.000297841	1.11663	NOT
PARP16	-0.0368779	7.46936	-4.12628	4.00168e-05	0.000297841	1.11658	NOT
RNF26	-0.0458866	7.55	-4.12573	4.0111e-05	0.000298376	1.11436	NOT
SLC25A36	0.0375102	7.24398	4.12551	4.01495e-05	0.000298409	1.11345	NOT
TNFSF14	-0.109321	9.99794	-4.12544	4.01601e-05	0.000298409	1.1132	DOWN
IWS1	0.0465623	8.12117	4.12452	4.03185e-05	0.00029942	1.10947	NOT
GRAMD4	-0.0474519	7.74363	-4.1227	4.06325e-05	0.000301584	1.10214	NOT
TMEM180	-0.0314602	7.30361	-4.12081	4.0963e-05	0.000303867	1.09447	NOT
PDCD6	0.0580639	9.98768	4.1206	4.09995e-05	0.00030397	1.09363	NOT
CNNM3	-0.0702467	8.47917	-4.11776	4.14991e-05	0.000307503	1.08217	NOT
ZNF721	0.0715938	7.51369	4.11699	4.16351e-05	0.000308276	1.07908	NOT
NKIRAS1	0.0302774	7.22468	4.11691	4.16496e-05	0.000308276	1.07875	NOT
BTBD12	-0.0551142	7.76607	-4.11526	4.1944e-05	0.000310283	1.07209	NOT
LILRA1	-0.0410607	7.2338	-4.11387	4.21925e-05	0.000311949	1.0665	NOT
NCF1C	-0.110237	11.3654	-4.11333	4.22891e-05	0.00031249	1.06434	DOWN
NCKAP1L	-0.0785422	9.42285	-4.112	4.25301e-05	0.000314098	1.05896	NOT
PPIL5	0.0475301	7.58676	4.11185	4.25568e-05	0.000314121	1.05837	NOT
NLGN3	-0.0152012	7.00951	-4.10842	4.31833e-05	0.000318569	1.04455	NOT
PXN	-0.071725	8.12739	-4.10775	4.33067e-05	0.000319303	1.04185	NOT
EGLN2	-0.0600854	10.2534	-4.10686	4.34709e-05	0.000320337	1.03827	NOT
FAH	-0.0589481	7.48528	-4.10642	4.35524e-05	0.000320761	1.0365	NOT
GIMAP2	0.11098	7.58201	4.1049	4.38332e-05	0.000322651	1.03042	UP
ID3	0.0836675	7.96729	4.10338	4.41177e-05	0.000324566	1.0243	NOT
ST13	0.0700186	8.01127	4.10308	4.41755e-05	0.000324812	1.02307	NOT
SAR1A	0.0814222	8.1299	4.10244	4.42954e-05	0.000325515	1.0205	NOT
STK25	-0.0468317	8.53084	-4.10165	4.44446e-05	0.000326432	1.01732	NOT
IGFL3	-0.0421905	7.22389	-4.10117	4.4534e-05	0.000326909	1.01542	NOT
NFKBIZ	-0.0695215	8.56606	-4.10032	4.4696e-05	0.000327918	1.01199	NOT
IFNGR2	-0.076012	11.7886	-4.09657	4.54129e-05	0.000332994	0.996946	NOT
TMEM127	-0.0580563	7.95545	-4.09518	4.56809e-05	0.000334776	0.991382	NOT
ALDH4A1	-0.0199204	7.07273	-4.09474	4.57672e-05	0.000335224	0.989599	NOT
INHBB	-0.0205543	7.07312	-4.0932	4.60663e-05	0.000337231	0.98344	NOT
ZBTB33	0.104864	8.8649	4.09306	4.60947e-05	0.000337253	0.982858	NOT
MTR	0.0424716	7.56744	4.09248	4.62086e-05	0.000337902	0.980524	NOT
LY96	0.209486	8.72293	4.09217	4.62678e-05	0.00033815	0.979314	UP
CCDC109B	0.0909457	9.75029	4.08956	4.67844e-05	0.000341645	0.968817	NOT
GTSCR1	0.0543602	7.35963	4.08949	4.67972e-05	0.000341645	0.96856	NOT
CTSA	-0.105473	9.24323	-4.08917	4.68615e-05	0.000341928	0.967261	NOT
KIF3B	-0.0388992	7.5196	-4.08788	4.71186e-05	0.000343616	0.962089	NOT
FAM127B	-0.0361998	7.62578	-4.08485	4.7726e-05	0.000347856	0.949982	NOT
PRF1	-0.151405	10.4871	-4.08299	4.81038e-05	0.000350418	0.942529	DOWN
GMFB	0.106055	8.34229	4.08263	4.81778e-05	0.000350766	0.941077	UP
SNX11	-0.0377587	8.0629	-4.08162	4.83834e-05	0.000352071	0.937052	NOT
ZNF565	-0.0284299	7.2397	-4.0797	4.87774e-05	0.000354582	0.929386	NOT
APOBEC3H	-0.0507852	7.37713	-4.07968	4.87815e-05	0.000354582	0.929307	NOT
ZC3H18	-0.0481253	7.7102	-4.07765	4.92021e-05	0.000357444	0.921194	NOT
VCL	-0.0715454	8.5692	-4.07688	4.9363e-05	0.000358418	0.918109	NOT
MAD2L2	-0.0509675	9.07367	-4.07587	4.95732e-05	0.000359749	0.914093	NOT
H2AFY	-0.0827002	9.0923	-4.075	4.97555e-05	0.000360876	0.910624	NOT
MRPS25	0.0449047	7.60224	4.07352	5.00681e-05	0.000362946	0.904706	NOT
PGS1	-0.0759552	9.62468	-4.0718	5.0433e-05	0.000365393	0.897843	NOT
NCOR1	-0.0536477	7.628	-4.07117	5.05672e-05	0.000366023	0.895333	NOT
TWF2	-0.0604101	9.67214	-4.07114	5.05748e-05	0.000366023	0.895192	NOT
LOC338799	-0.0519169	7.73671	-4.0687	5.10973e-05	0.000369511	0.885479	NOT
PRR14	-0.0753271	10.3219	-4.06863	5.1112e-05	0.000369511	0.885208	NOT
BMF	-0.0459089	7.44697	-4.06831	5.11823e-05	0.000369819	0.883909	NOT
USP44	0.018036	7.00614	4.06771	5.1311e-05	0.000370549	0.881536	NOT
FGFR1OP2	0.0626207	7.46598	4.06382	5.21602e-05	0.000376478	0.866029	NOT
ZNF256	0.0429371	7.26566	4.06348	5.22338e-05	0.000376806	0.864695	NOT
TPST2	-0.0679924	9.47221	-4.06295	5.2351e-05	0.000377447	0.862579	NOT
DUS4L	0.0288988	7.18147	4.05984	5.30412e-05	0.000382217	0.850205	NOT
RNF219	0.0437585	8.03109	4.05924	5.31759e-05	0.000382981	0.84781	NOT
SMEK2	0.0827337	8.1959	4.05793	5.34708e-05	0.000384898	0.842585	NOT
GRSF1	0.0552041	8.26876	4.0564	5.38151e-05	0.000387167	0.836523	NOT
OSM	-0.0508723	7.53017	-4.05328	5.45272e-05	0.000391965	0.824107	NOT
PDGFRB	-0.04797	7.18902	-4.05322	5.45406e-05	0.000391965	0.823875	NOT
CTDP1	-0.0412048	7.72474	-4.05151	5.4933e-05	0.000394573	0.817103	NOT
RCN2	0.0449118	7.30042	4.05069	5.5123e-05	0.000395568	0.813843	NOT
C19orf25	-0.0411611	7.82026	-4.05066	5.51309e-05	0.000395568	0.813708	NOT
MGRN1	-0.0885609	8.63511	-4.04722	5.59329e-05	0.000401073	0.800069	NOT
SLC25A46	0.0638966	7.66813	4.04711	5.59581e-05	0.000401073	0.799642	NOT
VSIG4	-0.0405222	7.28593	-4.04318	5.68895e-05	0.00040753	0.784054	NOT
MPHOSPH9	0.0295115	7.30855	4.04257	5.70353e-05	0.000408356	0.781636	NOT
ADO	0.0678218	7.80005	4.0418	5.72206e-05	0.000409463	0.778575	NOT
YPEL5	0.108025	9.77634	4.04156	5.72778e-05	0.000409653	0.777631	UP
VAV1	-0.0631159	8.37139	-4.04045	5.75447e-05	0.000411341	0.773242	NOT
CCDC146	0.0397047	7.35595	4.04025	5.75935e-05	0.00041147	0.772441	NOT
DERA	0.0600075	8.91669	4.03906	5.78822e-05	0.000413126	0.767719	NOT
DYRK4	0.0482109	7.85876	4.03904	5.78872e-05	0.000413126	0.767639	NOT
CUEDC2	-0.0472412	8.9443	-4.03834	5.80568e-05	0.000414116	0.764876	NOT
GLB1	-0.0416336	8.11031	-4.0369	5.84085e-05	0.000416402	0.759174	NOT
RGS1	0.0278654	7.05867	4.03646	5.85148e-05	0.000416938	0.757456	NOT
UQCRC2	0.0752447	7.94265	4.03617	5.85862e-05	0.000417224	0.756306	NOT
NUP210	-0.0578462	8.23398	-4.03545	5.87635e-05	0.000418263	0.753453	NOT
E2F3	0.0920861	8.51336	4.03491	5.8896e-05	0.000418983	0.751326	NOT
SELK	0.0710947	8.05153	4.03389	5.91499e-05	0.000420565	0.747266	NOT
FBN2	-0.0494788	7.44629	-4.03362	5.92157e-05	0.000420629	0.746215	NOT
PHF14	0.0364845	7.41002	4.0336	5.92218e-05	0.000420629	0.746118	NOT
SUGT1	0.0313077	7.35318	4.0333	5.92953e-05	0.000420927	0.744948	NOT
C3AR1	-0.0523919	7.57485	-4.03127	5.98008e-05	0.00042429	0.736934	NOT
C5orf39	0.0807746	9.04466	4.03078	5.99232e-05	0.000424933	0.735004	NOT
UBL3	0.0964348	8.63951	4.03048	5.99997e-05	0.00042525	0.733799	NOT
ZNF692	-0.044894	7.83659	-4.03025	6.00583e-05	0.000425439	0.732878	NOT
TTC27	0.050314	7.58301	4.03002	6.01151e-05	0.000425616	0.731985	NOT
CACNA2D4	-0.0463761	7.4003	-4.02932	6.02918e-05	0.000426641	0.729214	NOT
GPATCH4	0.0353805	7.41222	4.02798	6.06292e-05	0.000428802	0.723946	NOT
YEATS4	0.053562	7.30028	4.02728	6.08089e-05	0.000429845	0.721153	NOT
APEH	-0.0495336	9.28263	-4.02702	6.08748e-05	0.000430083	0.720131	NOT
STK4	-0.0640966	11.8411	-4.02443	6.15361e-05	0.000434526	0.709932	NOT
PFKL	-0.0632524	8.28388	-4.0233	6.18277e-05	0.000436354	0.70547	NOT
LARS	0.0477919	8.20656	4.01857	6.30614e-05	0.000444826	0.686825	NOT
ZBTB17	-0.0471323	8.01164	-4.01693	6.34938e-05	0.00044764	0.680376	NOT
UBQLNL	-0.0410532	7.26658	-4.01636	6.36444e-05	0.000448465	0.67814	NOT
HEMK1	-0.0293705	7.34176	-4.01233	6.47238e-05	0.00045583	0.66227	NOT
SELT	0.0740707	7.84447	4.01141	6.49724e-05	0.00045734	0.658654	NOT
ASGR1	-0.0863105	9.29596	-4.00883	6.56758e-05	0.000462048	0.648493	NOT
SNRPD1	0.026123	7.11866	4.0084	6.57936e-05	0.000462633	0.646803	NOT
TNFAIP2	-0.0767033	8.365	-4.00775	6.59723e-05	0.000463646	0.644243	NOT
TREML2	-0.0755555	8.26513	-4.00734	6.60829e-05	0.000464178	0.642663	NOT
GLRX	0.131366	9.95882	4.00618	6.64028e-05	0.000466181	0.638107	UP
IQCG	0.0295215	7.10668	4.00591	6.64774e-05	0.000466459	0.637048	NOT
PLEKHA1	0.108273	8.13865	4.00578	6.65147e-05	0.000466467	0.636519	UP
CORO1B	-0.0511577	8.14239	-4.00566	6.65483e-05	0.000466467	0.636042	NOT
COPA	-0.0653082	10.1209	-4.005	6.67308e-05	0.000467363	0.633459	NOT
BTAF1	0.116922	8.64144	4.00494	6.67462e-05	0.000467363	0.633241	UP
N6AMT2	0.0299185	7.35741	4.00383	6.70572e-05	0.000469295	0.628855	NOT
HYOU1	-0.039729	7.41484	-4.00256	6.74105e-05	0.000471521	0.623898	NOT
TBC1D25	-0.043113	7.54947	-4.00228	6.74909e-05	0.000471836	0.622773	NOT
XKR8	-0.0357249	7.3109	-4.00058	6.79675e-05	0.000474919	0.616136	NOT
TTLL4	-0.0404701	7.50066	-3.99994	6.81494e-05	0.000475942	0.613614	NOT
SEC63	-0.0461189	7.83369	-3.99801	6.86975e-05	0.000479519	0.606058	NOT
FUNDC1	0.030914	7.55235	3.99726	6.89132e-05	0.000480773	0.603102	NOT
ATP5SL	-0.0477463	8.83088	-3.99694	6.90037e-05	0.000481153	0.601863	NOT
MST4	0.0896277	8.75558	3.99661	6.91004e-05	0.000481576	0.600542	NOT
ZNF192	0.0165829	7.01604	3.99347	7.00055e-05	0.00048763	0.588268	NOT
FPR2	-0.128825	9.91246	-3.99263	7.02519e-05	0.000489091	0.584955	DOWN
ZNF227	0.0267462	7.36996	3.99143	7.06005e-05	0.000491262	0.580287	NOT
VPS52	-0.0476269	8.16298	-3.9911	7.06995e-05	0.000491695	0.578965	NOT
FASTK	-0.0611177	7.94287	-3.9902	7.09639e-05	0.000493277	0.575444	NOT
TNFRSF17	0.0590569	7.16099	3.98853	7.14561e-05	0.000496439	0.568927	NOT
CSNK1G1	0.0401254	7.89664	3.98824	7.15414e-05	0.000496774	0.567801	NOT
ZNF213	-0.0633841	7.99687	-3.98811	7.15812e-05	0.000496792	0.567277	NOT
CEBPA	-0.0794755	9.46443	-3.98696	7.19221e-05	0.000498899	0.562797	NOT
MBIP	0.0356915	7.24677	3.98546	7.23709e-05	0.000501752	0.55693	NOT
TIPRL	0.0439494	7.48163	3.98503	7.24987e-05	0.000502377	0.555267	NOT
SAP130	-0.0504403	8.31481	-3.98433	7.27111e-05	0.000503588	0.552508	NOT
C11orf46	0.0778738	7.8963	3.98351	7.29595e-05	0.000505046	0.549292	NOT
DYNC1I2	0.0539197	8.31868	3.98167	7.35171e-05	0.000508642	0.542114	NOT
SRP72	0.0584424	7.70452	3.98015	7.39801e-05	0.000511581	0.536195	NOT
LOC728417	-0.0930159	8.10763	-3.97904	7.43202e-05	0.000513667	0.53187	NOT
TMBIM4	0.0752349	11.3556	3.97864	7.44426e-05	0.000514246	0.530319	NOT
DUSP8	-0.0490217	7.6381	-3.97842	7.45132e-05	0.000514468	0.529425	NOT
DOK2	-0.070849	8.69896	-3.97819	7.45828e-05	0.000514683	0.528545	NOT
CSF1R	-0.104493	10.5946	-3.97632	7.51624e-05	0.000518415	0.521247	NOT
RB1CC1	0.100781	8.12902	3.97557	7.53954e-05	0.000519753	0.518329	NOT
FLNA	-0.0702646	7.90911	-3.97467	7.56779e-05	0.000521432	0.514803	NOT
ZNF17	0.0488095	7.3975	3.97143	7.66956e-05	0.000528172	0.502211	NOT
TESK2	-0.0419838	7.66148	-3.97024	7.70755e-05	0.000530514	0.497553	NOT
MAPK6	0.0571429	7.40738	3.96965	7.7264e-05	0.000531538	0.495251	NOT
TSC22D4	-0.0711482	8.56407	-3.96945	7.73272e-05	0.000531699	0.494479	NOT
KIAA1712	0.0676831	7.80989	3.96915	7.74213e-05	0.000532072	0.493334	NOT
ARGLU1	0.158239	9.95947	3.96725	7.80307e-05	0.000535945	0.485944	UP
TP53INP2	-0.0611594	7.83374	-3.96715	7.80651e-05	0.000535945	0.485528	NOT
UBE2Q2	0.0931466	8.20791	3.96554	7.85829e-05	0.000539223	0.479296	NOT
RABGAP1L	0.0390994	7.52679	3.96523	7.86859e-05	0.000539653	0.478063	NOT
BCKDHA	-0.0649953	8.52355	-3.96408	7.90585e-05	0.000541743	0.47361	NOT
DNM2	-0.0664794	8.83834	-3.96404	7.90718e-05	0.000541743	0.473452	NOT
EIF3J	0.0395216	7.46936	3.96369	7.91871e-05	0.000542255	0.472079	NOT
C7orf23	0.0995886	8.55787	3.96085	8.01182e-05	0.000548104	0.461061	NOT
SULT1A1	-0.0896088	10.2803	-3.96072	8.01611e-05	0.000548104	0.460557	NOT
IVD	-0.043056	7.51277	-3.96071	8.01644e-05	0.000548104	0.460519	NOT
HSF5	0.0199618	7.0321	3.96028	8.03089e-05	0.000548812	0.458821	NOT
RFC4	0.0365854	7.51554	3.95955	8.05494e-05	0.000550174	0.456003	NOT
SLC16A5	-0.074767	8.96522	-3.95922	8.06597e-05	0.000550645	0.454714	NOT
NDC80	0.0225679	7.05036	3.95811	8.10282e-05	0.000552879	0.450419	NOT
CCDC66	0.0412386	7.31615	3.95776	8.11442e-05	0.000553388	0.44907	NOT
SCPEP1	-0.0699969	9.58308	-3.95628	8.16402e-05	0.000556487	0.443328	NOT
CENPN	0.021769	7.06249	3.95519	8.20093e-05	0.000558717	0.439078	NOT
GUSB	-0.0616624	9.13033	-3.95325	8.26658e-05	0.000562903	0.431565	NOT
NOD2	-0.105738	8.75837	-3.9523	8.29889e-05	0.000564815	0.42789	NOT
MKNK2	-0.0821419	10.1253	-3.95188	8.31328e-05	0.000565506	0.426257	NOT
PLCG2	-0.0799826	10.325	-3.95158	8.32375e-05	0.00056593	0.425071	NOT
INSIG2	0.0523727	7.479	3.94983	8.38362e-05	0.000569711	0.41832	NOT
GLE1	-0.039042	7.31604	-3.94809	8.44377e-05	0.000573375	0.411584	NOT
CMTM3	-0.0885153	8.0227	-3.94802	8.44651e-05	0.000573375	0.411278	NOT
NSMCE2	0.0398716	7.17835	3.9479	8.45041e-05	0.000573375	0.410843	NOT
CD58	0.0875413	8.15343	3.94598	8.51745e-05	0.000577403	0.4034	NOT
PIM3	-0.0283262	7.21804	-3.94595	8.51842e-05	0.000577403	0.403292	NOT
PLEKHM2	-0.0554041	9.44896	-3.94465	8.56427e-05	0.000579884	0.398235	NOT
WDFY1	0.104954	8.81744	3.94461	8.56564e-05	0.000579884	0.398085	NOT
PPP2R1A	-0.0652629	10.0571	-3.94454	8.56805e-05	0.000579884	0.39782	NOT
C15orf17	-0.0232528	7.44374	-3.94441	8.57253e-05	0.000579894	0.397327	NOT
NCAPH2	-0.0290012	7.51963	-3.94398	8.58782e-05	0.000580634	0.395649	NOT
MIER2	-0.0275981	7.24656	-3.94169	8.66867e-05	0.000585533	0.386822	NOT
FAM125A	-0.0500808	8.35016	-3.94168	8.66905e-05	0.000585533	0.386781	NOT
STAT2	-0.0895782	10.7278	-3.94152	8.67472e-05	0.000585621	0.386164	NOT
KLHL12	0.0434881	8.12681	3.94069	8.70439e-05	0.000587078	0.382948	NOT
FKBP3	0.0647211	7.26025	3.94067	8.7051e-05	0.000587078	0.382872	NOT
ZDHHC24	-0.0365339	7.46512	-3.94038	8.71557e-05	0.000587488	0.381739	NOT
GALNT4	-0.0564302	7.71481	-3.93961	8.74306e-05	0.000589043	0.378774	NOT
NFKBIA	-0.091626	11.2243	-3.9385	8.78296e-05	0.000591433	0.374485	NOT
CNTNAP2	0.0717643	7.19395	3.93794	8.80325e-05	0.000592501	0.372312	NOT
FGL2	0.0912858	11.75	3.9375	8.81925e-05	0.000593279	0.370602	NOT
BZW2	0.0507269	8.14995	3.93276	8.99224e-05	0.000604612	0.352307	NOT
C20orf20	0.0549497	8.21786	3.93222	9.01217e-05	0.000605647	0.350223	NOT
HOOK2	-0.0294095	7.35616	-3.9313	9.04605e-05	0.000607618	0.346689	NOT
PSAP	-0.0779751	12.6091	-3.93012	9.08972e-05	0.000610245	0.342154	NOT
MKRN2	0.0518527	8.17578	3.92981	9.10129e-05	0.000610715	0.340956	NOT
DGCR14	-0.0377516	7.62449	-3.92949	9.11349e-05	0.000611226	0.339695	NOT
SIL1	-0.0436993	7.6415	-3.92739	9.19192e-05	0.000616177	0.331626	NOT
TRAPPC2L	0.0594182	8.20128	3.92625	9.23501e-05	0.000618755	0.327223	NOT
ABHD2	-0.0532933	7.75046	-3.92544	9.2656e-05	0.000620493	0.324109	NOT
DAG1	-0.036661	7.39646	-3.92326	9.34841e-05	0.000625483	0.315731	NOT
ZFYVE27	-0.0315249	7.32531	-3.92324	9.34947e-05	0.000625483	0.315624	NOT
LYN	-0.0932866	12.3359	-3.92289	9.36273e-05	0.000626056	0.31429	NOT
[truncated: 11,363 more rows]

## Sheet: Table S4
Table S4. KEGG Pathway Enrichment Analysis Based on Differential Expression Genes Between AD and Non-AD Samples.
ID	setSize	enrichmentScore	NES	pvalue	p.adjust	qvalue	rank	leading_edge	core_enrichment
KEGG_OXIDATIVE_PHOSPHORYLATION	79	0.756915	2.27554	1.32262e-10	1.17713e-08	1.04418e-08	581	tags=34%, list=4%, signal=33%	NDUFA1/NDUFS5/COX17/ATP6V1E1/UQCRB/NDUFB2/NDUFA8/ATP6V1D/ATP6AP1/NDUFS4/ATP6V1G1/PPA1/NDUFB3/COX6C/COX7C/UQCRQ/COX7B/TCIRG1/COX7A2/UQCRH/ATP6V0B/NDUFA4/COX6A1/NDUFB6/NDUFB5/NDUFS3/UQCRC1
KEGG_PARKINSONS_DISEASE	74	0.735723	2.1984	6.30743e-09	3.74241e-07	3.3197e-07	581	tags=27%, list=4%, signal=26%	NDUFA1/NDUFS5/UQCRB/NDUFB2/NDUFA8/NDUFS4/NDUFB3/COX6C/COX7C/UQCRQ/COX7B/VDAC3/COX7A2/UQCRH/NDUFA4/COX6A1/NDUFB6/NDUFB5/NDUFS3/UQCRC1
KEGG_ALZHEIMERS_DISEASE	116	0.653085	2.09666	2.70772e-08	1.20494e-06	1.06884e-06	1140	tags=26%, list=9%, signal=24%	NDUFA1/NDUFS5/NAE1/UQCRB/NDUFB2/NDUFA8/NDUFS4/NDUFB3/COX6C/COX7C/UQCRQ/COX7B/PLCB2/TNFRSF1A/COX7A2/UQCRH/NDUFA4/GAPDH/COX6A1/NDUFB6/NDUFB5/NDUFS3/UQCRC1/MAPK3/CASP9/CALM2/FADD/LRP1/NCSTN/CDK5R1
KEGG_OLFACTORY_TRANSDUCTION	140	-0.582176	-1.86992	3.49064e-07	1.24267e-05	1.10231e-05	3942	tags=47%, list=30%, signal=34%	OR1F1/OR6C2/OR10AD1/OR52N5/OR6V1/OR9A2/OR7A10/OR8H2/CAMK2A/OR10H3/OR51M1/OR2L3/OR5F1/OR7D2/CNGA4/PRKX/OR7C2/OR2AG1/CNGA3/OR9G1/OR5AS1/OR12D3/CLCA4/OR52M1/OR10J1/OR1E2/OR4C12/OR51I2/OR4K13/OR5D16/OR8K5/PRKG1/OR5M10/OR1N1/GUCA1B/OR4D10/CLCA1/OR6Y1/OR4B1/OR52K2/OR7E24/OR51D1/OR2M3/OR4D6/OR5P3/OR4A16/OR10A4/OR2T6/OR4C13/OR1D4/OR1J1/OR8J3/OR10A7/OR7A17/OR52E6/OR52K1/OR2A14/OR4S1/OR52W1/OR4C45/OR2M4/OR…
KEGG_HUNTINGTONS_DISEASE	126	0.590509	1.89679	3.13022e-06	6.96473e-05	6.17806e-05	581	tags=19%, list=4%, signal=18%	NDUFA1/NDUFS5/SOD1/UQCRB/NDUFB2/NDUFA8/NDUFS4/NDUFB3/COX6C/COX7C/UQCRQ/COX7B/VDAC3/PLCB2/POLR2A/COX7A2/UQCRH/CREBBP/NDUFA4/COX6A1/NDUFB6/NDUFB5/NDUFS3/UQCRC1
KEGG_NUCLEOTIDE_EXCISION_REPAIR	43	0.675219	1.82811	0.000694569	0.0123633	0.0109669	608	tags=16%, list=5%, signal=16%	CETN2/RPA3/GTF2H5/RBX1/POLE3/RPA2/POLE4
KEGG_DRUG_METABOLISM_CYTOCHROME_P450	39	-0.633204	-1.68244	0.00207934	0.0308436	0.0273598	952	tags=33%, list=7%, signal=31%	CYP2A7/CYP2B6/GSTZ1/CYP2A13/ADH5/CYP2E1/MGST1/ALDH1A3/CYP2D6/GSTA4/UGT2B17/ADH6/MGST2
KEGG_PYRUVATE_METABOLISM	35	0.662842	1.71111	0.002711	0.0355036	0.0314934	1044	tags=23%, list=8%, signal=21%	MDH1/LDHB/ACAT1/PDHB/PCK2/ALDH2/ACAT2/DLD
KEGG_ECM_RECEPTOR_INTERACTION	59	-0.575732	-1.63646	0.00279241	0.0355036	0.0314934	3177	tags=41%, list=24%, signal=31%	COL1A2/GP1BA/COL4A2/SDC1/IBSP/ITGA7/SDC2/SDC4/ITGA2/COL4A4/SV2B/COL6A3/LAMB2/GP5/ITGA11/COL11A2/SDC3/ITGA10/COL11A1/ITGA6/LAMA1/CHAD/COL6A2/TNC
KEGG_PROPANOATE_METABOLISM	30	0.681484	1.69915	0.00418274	0.0496352	0.0440288	1049	tags=27%, list=8%, signal=25%	LDHB/ACAT1/ACADM/MCEE/SUCLG1/ALDH2/ACAT2/SUCLG2

## Sheet: Table S5
Table S5. Gene Ontology Enrichment Analysis Based on Differential Expression Genes Between AD and Non-AD Samples
ID	setSize	enrichmentScore	NES	pvalue	p.adjust	qvalue	rank	leading_edge	core_enrichment
GOBP_CYTOPLASMIC_TRANSLATION	138	0.747908	2.42044	1e-10	1.53233e-07	1.44667e-07	1074	tags=36%, list=8%, signal=33%	RPS25/EIF3E/RPL6/RPS12/RPS27A/RPL11/RPL17/RPL12/RPL4/RPS24/RPL30/ZC3H15/RPL23/RPL5/RPL35/DENR/RPL7/RPS20/RPS27/RPL35A/RPS3A/RPS4X/RPL26L1/DPH5/RPL22/RPS17/RPL26/NCK1/RPL31/RPL32/RPS14/CNBP/RPL27/RPS29/RPL39/EIF3M/RPL3/EIF4A2/RPL21/RPS10/RPS13/RPL24/DPH3/RPS6/RPS18/DRG1/ZNF385A/RWDD1/MCTS1
GOBP_RIBOSOME_BIOGENESIS	226	0.60624	2.07529	1e-10	1.53233e-07	1.44667e-07	1663	tags=28%, list=12%, signal=25%	RPS25/GTF2H5/GNL2/RPL6/MRPL22/RPL11/RPS24/RSL1D1/UTP6/RPL5/RPS27L/RPL35/EMG1/MRPL36/NGDN/MPHOSPH10/LTV1/RPL7/ZNF622/RPS27/RPL35A/PAK1IP1/NUP88/RPL26L1/EBNA1BP2/RPS17/RPL26/METTL5/SIRT7/TFB2M/RIOK2/FRG1/WDR75/RPS14/NSUN5/RPP40/NOL11/RPL27/EXOSC1/FBL/RRP12/PWP1/RPL24/RRP15/RPS6/SDAD1/MRPL1/WDR12/GTPBP4/EXOSC9/EXOSC8/DDX18/EXOSC7/ABCE1/DKC1/RAN/TFB1M/MRPS7/ZNHIT3/EXOSC4/NOL8/TBL3/NGRN
GOBP_RIBONUCLEOPROTEIN_COMPLEX_BIOGENESIS	334	0.572614	2.03198	1e-10	1.53233e-07	1.44667e-07	1312	tags=22%, list=10%, signal=21%	RPS25/GTF2H5/EIF3E/GNL2/RPL6/MRPL22/RPL11/SNRPG/SNRPB2/RPS24/RSL1D1/UTP6/RPL5/RPS27L/RPL35/SLU7/EMG1/MRPL36/NGDN/MPHOSPH10/LTV1/DENR/RPL7/GEMIN6/ZNF622/RPS27/RPL35A/PAK1IP1/NUP88/DDX1/RPL26L1/EBNA1BP2/RPS17/RPL26/METTL5/SIRT7/SF3B4/COIL/TFB2M/RIOK2/FRG1/WDR75/RPS14/DDX23/NSUN5/RPP40/NOL11/RPL27/EIF3M/EXOSC1/SNRPA1/FBL/PRPF18/CLNS1A/RRP12/SNRPF/PWP1/RPL24/RRP15/RPS6/SDAD1/MRPL1/WDR12/MCTS1/NUDT21/…
GOBP_ATP_SYNTHESIS_COUPLED_ELECTRON_TRANSPORT	64	0.785413	2.2555	2.48706e-10	2.85825e-07	2.69846e-07	581	tags=30%, list=4%, signal=29%	NDUFA1/NDUFS5/UQCRB/NDUFB2/NDUFA8/NDUFS4/NDUFB3/COX6C/COX7C/UQCRQ/COX7B/COX7A2/UQCRH/NDUFA4/COX6A1/NDUFB6/NDUFB5/NDUFS3/UQCRC1
GOBP_OXIDATIVE_PHOSPHORYLATION	82	0.739359	2.22228	6.39574e-10	5.88025e-07	5.55151e-07	581	tags=24%, list=4%, signal=23%	NDUFA1/NDUFS5/UQCRB/NDUFB2/NDUFA8/NDUFS4/NDUFB3/COX6C/COX7C/UQCRQ/COX7B/COX7A2/UQCRH/NDUFA4/COX6A1/ABCD1/NDUFB6/NDUFB5/NDUFS3/UQCRC1
GOBP_RRNA_METABOLIC_PROCESS	194	0.592328	1.99139	2.84118e-09	2.17682e-06	2.05512e-06	1312	tags=25%, list=10%, signal=23%	RPS25/GTF2H5/ZCCHC7/RPL11/RPS24/RSL1D1/UTP6/RPL5/RPL35/EMG1/NGDN/MPHOSPH10/RPL7/RPS27/RPL35A/EBNA1BP2/RPS17/RPL26/METTL5/SIRT7/TFB2M/RIOK2/FRG1/WDR75/RPS14/NSUN5/RPP40/NOL11/GTF3C1/RPL27/EXOSC1/FBL/POLR1E/RRP12/PWP1/RRP15/RPS6/DEDD2/MRPL1/WDR12/ANG/GTPBP4/EXOSC9/EXOSC8/DDX18/GTF3C5/EXOSC7/DKC1
GOBP_SENSORY_PERCEPTION	457	-0.466126	-1.69254	8.86266e-09	5.82024e-06	5.49485e-06	3623	tags=39%, list=27%, signal=29%	OR10H3/BBS7/MRGPRX2/LAMC3/ROM1/USH1G/RP1L1/RABGGTA/VN1R4/RAB3A/CCL2/GRAP/OR51M1/OR2L3/OR5F1/CDKN1B/OR7D2/CNGA4/USP53/OPRL1/OR4F21/OPRM1/OR7C2/OR2AG1/GRIN2A/CNGA3/HOMER2/NR2E1/OR9G1/OR5AS1/OPN1MW/OR12D3/PPEF1/TAC1/SLC45A2/SCARB2/OR52M1/OR10J1/TAS2R39/OR1E2/OR4C12/OR51I2/ZIC2/OR4K13/KCNQ4/CPLX4/RDH11/SLC24A2/CCR2/TAS2R16/TTC8/TNF/SLC26A5/OR5D16/PDE6D/GABRB2/P2RX2/AXIN1/OR8K5/P2RX3/TMC2/SERPINB6/CLN…
GOBP_RESPIRATORY_ELECTRON_TRANSPORT_CHAIN	80	0.699548	2.10547	5.24364e-08	3.01313e-05	2.84468e-05	1044	tags=29%, list=8%, signal=27%	NDUFA1/NDUFS5/UQCRB/NDUFB2/NDUFA8/NDUFS4/NDUFB3/COX6C/COX7C/GBA/UQCRQ/COX7B/COX7A2/UQCRH/NDUFA4/COX6A1/NDUFB6/NDUFB5/NDUFS3/UQCRC1/ETFA/DNAJC15/DLD
GOBP_AEROBIC_RESPIRATION	123	0.634183	2.01261	6.23872e-08	3.1866e-05	3.00845e-05	1049	tags=23%, list=8%, signal=21%	NDUFA1/NDUFS5/MDH1/UQCRB/NDUFB2/NDUFA8/NDUFS4/NDUFB3/COX6C/COX7C/UQCRQ/COX7B/COX7A2/UQCRH/ADSL/NDUFA4/COX6A1/BNIP3/ABCD1/NDUFB6/NDUFB5/NDUFS3/PDHB/UQCRC1/SUCLG1/DNAJC15/DLD/SUCLG2
GOBP_SENSORY_PERCEPTION_OF_CHEMICAL_STIMULUS	178	-0.55695	-1.84871	8.50798e-08	3.91112e-05	3.69246e-05	3497	tags=41%, list=26%, signal=31%	VN1R4/OR51M1/OR2L3/OR5F1/OR7D2/CNGA4/OR4F21/OR7C2/OR2AG1/OR9G1/OR5AS1/OR12D3/OR52M1/OR10J1/TAS2R39/OR1E2/OR4C12/OR51I2/OR4K13/TAS2R16/TTC8/OR5D16/P2RX2/OR8K5/P2RX3/OR5M10/TAAR5/NAV2/RTP4/CA6/OR1N1/OBP2A/OR4D10/OBP2B/OR6Y1/OR4B1/OR52K2/SLC6A3/OR7E24/TAS2R46/TAS2R45/PIGR/OR51D1/OR2M3/RTP1/OR4D6/OR5P3/OR4A16/OR10A4/OR2T6/B3GNT2/OR4C13/OR1D4/OR1J1/TAS2R13/OR8J3/OR10A7/OR7A17/OR52E6/OR52K1/TAS2R10/OR2…
GOBP_NADH_DEHYDROGENASE_COMPLEX_ASSEMBLY	37	0.813068	2.13101	1.74578e-07	7.29579e-05	6.88791e-05	535	tags=32%, list=4%, signal=31%	NDUFA1/NDUFS5/NDUFAF2/NDUFB2/NDUFA8/NDUFS4/NDUFB3/TMEM126B/TMEM126A/NDUFB6/NDUFB5/NDUFS3
GOBP_SENSORY_PERCEPTION_OF_SMELL	137	-0.595155	-1.91576	3.85252e-07	0.000147584	0.000139333	3459	tags=42%, list=26%, signal=32%	OR51M1/OR2L3/OR5F1/OR7D2/CNGA4/OR4F21/OR7C2/OR2AG1/OR9G1/OR5AS1/OR12D3/OR52M1/OR10J1/OR1E2/OR4C12/OR51I2/OR4K13/TTC8/OR5D16/OR8K5/OR5M10/NAV2/OR1N1/OBP2A/OR4D10/OBP2B/OR6Y1/OR4B1/OR52K2/SLC6A3/OR7E24/OR51D1/OR2M3/OR4D6/OR5P3/OR4A16/OR10A4/OR2T6/B3GNT2/OR4C13/OR1D4/OR1J1/OR8J3/OR10A7/OR7A17/OR52E6/OR52K1/OR2A14/OR4S1/OR52W1/OR4C45/OR2M4/OR1N2/OR7G3/OR5D14/OR11H1/OR4X1/BBS4
GOBP_MITOCHONDRIAL_TRANSLATION	116	0.622706	1.95911	4.25045e-07	0.000150302	0.0001419	769	tags=19%, list=6%, signal=18%	MRPL51/MRPL33/MRPS17/MRPS18C/MRPS33/MRPL22/MTIF3/MRPL32/MRPS21/MRPS22/MRPL39/MRPS31/MRPL17/MRPL36/MRPS28/MRPL50/MRPL3/MTIF2/MRPL13/MRPL24/MRPL48/MRPL40
GOBP_RIBOSOMAL_LARGE_SUBUNIT_BIOGENESIS	55	0.739137	2.0681	7.82517e-07	0.000239815	0.000226408	1215	tags=35%, list=9%, signal=32%	RPL6/RPL11/RSL1D1/RPL5/RPL35/RPL7/ZNF622/RPL35A/PAK1IP1/RPL26L1/EBNA1BP2/RPL26/RPL24/RRP15/SDAD1/MRPL1/WDR12/GTPBP4/DDX18
GOBP_DETECTION_OF_STIMULUS_INVOLVED_IN_SENSORY_PERCEPTION	181	-0.541796	-1.80368	7.4808e-07	0.000239815	0.000226408	3459	tags=41%, list=26%, signal=31%	OR51M1/OR2L3/OR5F1/OR7D2/OR4F21/OR7C2/OR2AG1/OR9G1/OR5AS1/OR12D3/PPEF1/OR52M1/OR10J1/TAS2R39/OR1E2/OR4C12/OR51I2/OR4K13/TAS2R16/TNF/OR5D16/OR8K5/TMC2/OR5M10/RTP4/CA6/OR1N1/ATP8A2/OR4D10/ITGA2/KCNQ1/OR6Y1/OR4B1/OR52K2/OR7E24/TAS2R46/TAS2R45/PIGR/OR51D1/OR2M3/RTP1/OR4D6/OR5P3/OR4A16/COL11A1/OR10A4/OR2T6/OR4C13/OR1D4/ADORA1/OR1J1/CACNB4/TAS2R13/OR8J3/LHFPL5/OR10A7/OR7A17/CRB1/MMP24/OR52E6/OR52K1/TAS…
GOBP_GENERATION_OF_PRECURSOR_METABOLITES_AND_ENERGY	349	0.46748	1.6637	8.97713e-07	0.000257924	0.000243505	1172	tags=17%, list=9%, signal=16%	NDUFA1/NDUFS5/COX17/MDH1/ACAT1/UQCRB/NDUFB2/NDUFA8/ACADVL/HK3/NDUFS4/NDUFB3/TKT/COX6C/COX7C/GBA/UQCRQ/COX7B/TALDO1/CISD1/GAA/G6PD/CYBA/PGK1/COX7A2/UQCRH/PGD/ADSL/NDUFA4/GAPDH/COX6A1/ACADM/BNIP3/ABCD1/NDUFB6/NDUFB5/POR/NDUFS3/PDHB/UQCRC1/GALK1/PPP1R2/PGM1/SUCLG1/P2RX7/ETFA/PYGB/ZBTB20/ALDH2/DNAJC15/DDIT4/DLD/SUCLG2/ENO1/PHKA2/PHKG2/GYG1/PPP1CC
GOBP_MITOCHONDRIAL_GENE_EXPRESSION	138	0.583442	1.88818	1.29695e-06	0.000350711	0.000331104	1198	tags=20%, list=9%, signal=19%	MRPL51/MRPL33/MRPS17/MRPS18C/MRPS33/MRPL22/MTIF3/MRPL32/MRPS21/MRPS22/MRPL39/MRPS31/MRPL17/MRPL36/MRPS28/MRPL50/MRPL3/MTIF2/TFB2M/MRPL13/MRPL24/MRPL48/MRPL40/MRPL1/MRPL14/MRPS23/POLRMT/FOXO3
GOBP_PROTON_MOTIVE_FORCE_DRIVEN_ATP_SYNTHESIS	36	0.803479	2.11301	1.45976e-06	0.000361729	0.000341506	535	tags=25%, list=4%, signal=24%	NDUFA1/NDUFS5/NDUFB2/NDUFA8/NDUFS4/NDUFB3/NDUFB6/NDUFB5/NDUFS3
GOBP_CELLULAR_RESPIRATION	157	0.563994	1.85869	1.49507e-06	0.000361729	0.000341506	1049	tags=20%, list=8%, signal=18%	NDUFA1/NDUFS5/MDH1/UQCRB/NDUFB2/NDUFA8/NDUFS4/NDUFB3/COX6C/COX7C/GBA/UQCRQ/COX7B/CISD1/COX7A2/UQCRH/ADSL/NDUFA4/COX6A1/BNIP3/ABCD1/NDUFB6/NDUFB5/NDUFS3/PDHB/UQCRC1/SUCLG1/ETFA/DNAJC15/DLD/SUCLG2
GOBP_RNA_SPLICING_VIA_TRANSESTERIFICATION_REACTIONS	213	0.526074	1.79009	1.78793e-06	0.000410956	0.000387981	1610	tags=23%, list=12%, signal=20%	CWC15/ZMAT2/LSM5/LSM3/SNRPG/SNRPB2/PLRG1/LARP7/LSM1/SLU7/MPHOSPH10/GEMIN6/MAGOH/DDX1/CWF19L2/PPWD1/SF3B4/COIL/FRG1/DHX16/WBP4/SRRM2/DDX23/LSM7/RBM42/SNRPA1/PRPF18/CLNS1A/EFTUD2/FXR1/SNRPF/PPIH/HSPA8/RBM23/DHX8/SF3A2/RALY/RBM25/PRMT5/PTBP1/SNRPA/BUD31/TFIP11/NCBP1/RAVER1/RSRC1/C9orf78/PRPF38A
GOBP_NCRNA_PROCESSING	308	0.468837	1.65312	2.1276e-06	0.000465741	0.000439703	1757	tags=22%, list=13%, signal=19%	RPS25/GTF2H5/SSB/RPL11/RPS24/RSL1D1/LARP7/UTP6/RPL5/RPL35/EMG1/NGDN/MPHOSPH10/RPL7/RPS27/RPL35A/DDX1/EBNA1BP2/RPS17/ZC3H12A/RPL26/METTL5/SIRT7/TFB2M/RIOK2/FRG1/WDR75/RPS14/NSUN5/RPP40/NOL11/INTS12/RPL27/EXOSC1/FBL/RRP12/INTS3/TPRKB/PWP1/RRP15/TSEN34/DPH3/RPS6/MRPL1/WDR12/GTPBP4/EXOSC9/EXOSC8/DDX18/PUS3/ELP2/EXOSC7/DKC1/TYW3/RIPK1/TFB1M/NCBP1/ZNHIT3/C2orf49/EXOSC4/NOL8/PUSL1/TBL3/ELAC2/BCDIN3D/TUT…
GOBP_MITOCHONDRIAL_RESPIRATORY_CHAIN_COMPLEX_ASSEMBLY	53	0.744373	2.07621	2.37815e-06	0.000496925	0.000469144	1561	tags=38%, list=12%, signal=33%	NDUFA1/NDUFS5/COX17/NDUFAF2/NDUFB2/NDUFA8/NDUFS4/NDUFB3/TMEM126B/TMEM126A/NDUFB6/NDUFB5/NDUFS3/SCO1/CHCHD7/TTC19/OMA1/CHCHD4/NDUFA9/TFAM
GOBP_ENERGY_DERIVATION_BY_OXIDATION_OF_ORGANIC_COMPOUNDS	215	0.516697	1.75607	2.53567e-06	0.000506802	0.000478469	1172	tags=19%, list=9%, signal=17%	NDUFA1/NDUFS5/MDH1/UQCRB/NDUFB2/NDUFA8/ACADVL/NDUFS4/NDUFB3/COX6C/COX7C/GBA/UQCRQ/COX7B/CISD1/GAA/COX7A2/UQCRH/ADSL/NDUFA4/COX6A1/ACADM/BNIP3/ABCD1/NDUFB6/NDUFB5/NDUFS3/PDHB/UQCRC1/PPP1R2/SUCLG1/ETFA/PYGB/DNAJC15/DLD/SUCLG2/PHKA2/PHKG2/GYG1/PPP1CC
GOBP_RNA_SPLICING	303	0.465516	1.63685	3.97538e-06	0.000761452	0.000718882	2310	tags=29%, list=17%, signal=24%	CWC15/ZMAT2/LSM5/ENY2/LSM3/SNRPG/SNRPB2/PLRG1/LARP7/PPIG/LSM1/SLU7/MPHOSPH10/GEMIN6/MAGOH/DDX1/ATXN7L3/POLR2A/CWF19L2/PPWD1/THOC7/SF3B4/COIL/FRG1/DHX16/WBP4/SRRM2/SUPT6H/DDX23/LSM7/RBM42/SNRPA1/PRPF18/CLNS1A/EFTUD2/FXR1/SNRPF/PPIH/RPS13/TSEN34/HSPA8/RBM23/DHX8/TAF6L/SF3A2/RALY/RBM25/TAF12/PRMT5/PTBP1/SNRPA/HSPA1A/BUD31/TFIP11/NCBP1/RAVER1/C2orf49/RSRC1/C9orf78/PRPF38A/THOC3/RRAGC/RBM17/RP9/IWS1/G…
GOBP_DETECTION_OF_CHEMICAL_STIMULUS	166	-0.537354	-1.75861	4.48638e-06	0.000824956	0.000778836	3459	tags=40%, list=26%, signal=30%	OR51M1/OR2L3/OR5F1/OR7D2/OR4F21/OR7C2/OR2AG1/KCNMB3/OR9G1/OR5AS1/OR12D3/OR52M1/OR10J1/TAS2R39/OR1E2/OR4C12/OR51I2/OR4K13/TAS2R16/OR5D16/P2RX2/OR8K5/OR5M10/RTP4/KCNMB4/CA6/CYB5R4/OR1N1/OR4D10/OR6Y1/OR4B1/OR52K2/OR7E24/TAS2R46/TAS2R45/PIGR/OR51D1/OR2M3/RTP1/OR4D6/OR5P3/OR4A16/TLR1/OR10A4/OR2T6/OR4C13/OR1D4/OR1J1/TAS2R13/OR8J3/OR10A7/OR7A17/OR52E6/OR52K1/TAS2R10/OR2A14/OR4S1/OR52W1/OR4C45/DMBT1/OR2M…
GOBP_PATTERN_SPECIFICATION_PROCESS	280	-0.458589	-1.59938	8.17555e-06	0.0014455	0.00136469	2963	tags=31%, list=22%, signal=24%	IRX2/SKI/HEYL/STIL/TTC8/HOXD4/SOSTDC1/DZIP1L/CER1/TGFBR2/WNT6/MEIS1/MKS1/MID1/AXIN1/IFT52/HOXC6/VAX2/DLX1/FST/FKBP8/MSX1/BMP1/SMAD1/GSC/YY1/EYA1/SFRP2/GREM1/ACVR1/MSX2/LHX3/POFUT1/HOXA10/PAX2/FRS2/HIPK1/BMP4/NRP1/C1QA/BMPR2/CRKL/PLXNA2/PROP1/GDF11/ALDH1A2/GAS8/EDN1/LRP5L/CLUAP1/ALX3/TDRKH/EMX2/ABI1/DLL1/MESP2/HOXD3/FEZF2/HAND2/SEMA3C/HOXD11/TBR1/TDRD10/IRX1/SIX3/TSHZ1/EFNB1/RFX3/HHEX/HOXB2/MLLT3/…
GOBP_ELECTRON_TRANSPORT_CHAIN	121	0.586193	1.85203	9.24116e-06	0.0015172	0.00143238	1044	tags=21%, list=8%, signal=20%	NDUFA1/NDUFS5/UQCRB/NDUFB2/NDUFA8/NDUFS4/NDUFB3/COX6C/COX7C/GBA/UQCRQ/COX7B/CYBA/COX7A2/UQCRH/NDUFA4/COX6A1/NDUFB6/NDUFB5/POR/NDUFS3/UQCRC1/ETFA/ALDH2/DNAJC15/DLD
GOBP_DETECTION_OF_STIMULUS	264	-0.470784	-1.6391	8.96771e-06	0.0015172	0.00143238	3274	tags=37%, list=25%, signal=28%	OR7C2/OR2AG1/HLA-DRB1/KCNMB3/OR9G1/GNA11/OR5AS1/OPN1MW/OR12D3/PPEF1/TAC1/GNGT2/OR52M1/OR10J1/TAS2R39/OR1E2/OR4C12/OR51I2/OR4K13/RDH11/TAS2R16/TNF/OR5D16/P2RX2/OR8K5/TMC2/ATF2/NMT1/OR5M10/RTP4/KCNMB4/CA6/OPN3/CYB5R4/OR1N1/ATP8A2/NAIP/RGR/JUP/TRPM3/OR4D10/ITGA2/KCNQ1/OR6Y1/OR4B1/OR52K2/OR7E24/TAS2R46/TAS2R45/PIGR/OR51D1/OR2M3/PTK2/RTP1/OR4D6/CDH2/PKDREJ/OR5P3/OR4A16/TLR1/COL11A1/OR10A4/CAV3/OR2T6/O…
GOBP_MITOCHONDRIAL_ELECTRON_TRANSPORT_NADH_TO_UBIQUINONE	35	0.773356	2.01906	2.01498e-05	0.00319409	0.00301552	1044	tags=34%, list=8%, signal=32%	NDUFA1/NDUFS5/NDUFB2/NDUFA8/NDUFS4/NDUFB3/NDUFA4/NDUFB6/NDUFB5/NDUFS3/DNAJC15/DLD
GOBP_NCRNA_METABOLIC_PROCESS	445	0.413633	1.49284	2.37489e-05	0.00363912	0.00343567	1596	tags=18%, list=12%, signal=16%	RPS25/GTF2H5/SSB/ZCCHC7/RPL11/RPS24/RSL1D1/LARP7/UTP6/RPL5/GNL3/RPL35/EMG1/NGDN/MPHOSPH10/RPL7/RPS27/RPL35A/DDX1/EBNA1BP2/RPS17/ZC3H12A/RPL26/METTL5/SIRT7/TFB2M/RIOK2/FRG1/WDR75/RPS14/NSUN5/RPP40/MYB/NOL11/GTF3C1/INTS12/RPL27/EXOSC1/FBL/POLR1E/RRP12/INTS3/SPI1/TPRKB/PWP1/RARA/RRP15/TSEN34/DPH3/RPS6/DEDD2/MRPL1/NR1H2/WDR12/ANG/GTPBP4/EXOSC9/FOXO3/FOS/EXOSC8/DDX18/PUS3/ELP2/GTF3C5/EXOSC7/XPO5/DKC1/…
GOBP_RIBOSOME_ASSEMBLY	45	0.71716	1.95154	2.46376e-05	0.00365351	0.00344926	796	tags=18%, list=6%, signal=17%	RPL6/MRPL22/RPL11/RPL5/RPS27L/RPS27/RPS14/RPL24
GOBP_SENSORY_ORGAN_DEVELOPMENT	358	-0.432198	-1.53954	2.59493e-05	0.00372778	0.00351938	2279	tags=25%, list=17%, signal=21%	CCNA2/TGIF2/GATA2/ATP6V1B1/TUB/SDC4/FOXE3/ADAM10/GSC/YY1/EYA1/ATP8A2/USH2A/TWIST1/BFSP1/SLC44A4/PKNOX1/SP3/DVL1/LHX3/RET/PAX2/IFT88/KCNQ1/FRS2/HIPK1/BNC2/SLC6A3/BMP4/NRP1/BMPR2/LAMB2/SHROOM2/JAG2/GDF11/ALDH1A2/EDN1/LRP5L/MFAP2/VEGFA/DLL1/SMOC1/HAND2/COL11A1/TFAP2A/LPCAT1/SPRY2/SKIL/BCL11B/CACNA1S/CRYAA/SIX3/CLIC4/COL8A1/ALDH1A3/TSHZ1/LAMA1/CRYGB/MYO3B/CTNS/LHFPL5/CRB1/MCM2/GLI3/IFT122/EPHA4/SMCHD…
GOBP_NEUTROPHIL_ACTIVATION_INVOLVED_IN_IMMUNE_RESPONSE	21	0.847414	1.97583	3.02276e-05	0.00421079	0.00397538	1072	tags=52%, list=8%, signal=48%	ITGAM/VAMP8/STXBP2/ITGB2/PTAFR/VAMP7/PRAM1/SPI1/MYD88/TYROBP/LILRA2
GOBP_RIBONUCLEOPROTEIN_COMPLEX_SUBUNIT_ORGANIZATION	158	0.521394	1.71687	5.76198e-05	0.00779054	0.007355	1516	tags=20%, list=11%, signal=18%	EIF3E/RPL6/RPL11/SNRPG/SNRPB2/RPL5/RPS27L/SLU7/DENR/GEMIN6/RPS27/DDX1/SF3B4/COIL/RPS14/DDX23/EIF3M/SNRPA1/PRPF18/CLNS1A/SNRPF/RPL24/MCTS1/DHX8/NUDT21/SF3A2/PRMT5/RUVBL2/TFIP11/NCBP1/MRPS7/ZNHIT3
GOBP_RIBOSOMAL_SMALL_SUBUNIT_BIOGENESIS	59	0.662645	1.88367	6.96429e-05	0.00860421	0.00812318	553	tags=25%, list=4%, signal=24%	RPS25/GTF2H5/RPS24/UTP6/RPS27L/EMG1/NGDN/MPHOSPH10/LTV1/RPS27/RPS17/RIOK2/RPS14/RPP40/NOL11
GOBP_HEMOGLOBIN_BIOSYNTHETIC_PROCESS	11	-0.893351	-1.80601	6.8207e-05	0.00860421	0.00812318	257	tags=36%, list=2%, signal=36%	EIF2AK1/ALAS2/INHBA/HIF1A
GOBP_ESTABLISHMENT_OF_RNA_LOCALIZATION	122	0.546515	1.73109	7.11246e-05	0.00860421	0.00812318	1475	tags=20%, list=11%, signal=18%	CETN2/SSB/ENY2/NUP37/CETN3/MAGOH/NUP88/NUP107/NXF1/THOC7/SUPT6H/UPF1/ZC3H3/MVP/TOMM20/PCID2/UPF3B/FLOT1/ATXN2/XPO5/TST/RAN/NUP133/NCBP1
GOBP_SENSORY_SYSTEM_DEVELOPMENT	246	-0.463991	-1.60097	7.03563e-05	0.00860421	0.00812318	2251	tags=26%, list=17%, signal=22%	TGIF2/TUB/FOXE3/YY1/ATP8A2/TWIST1/BFSP1/SLC44A4/PKNOX1/SP3/RET/PAX2/FRS2/HIPK1/SLC6A3/BMP4/NRP1/C1QA/BMPR2/LAMB2/SHROOM2/GDF11/ALDH1A2/LRP5L/MFAP2/VEGFA/DLL1/SMOC1/TFAP2A/LPCAT1/SPRY2/SKIL/BCL11B/CACNA1S/CRYAA/SIX3/CLIC4/COL8A1/ALDH1A3/LAMA1/CRYGB/CTNS/CRB1/GLI3/IFT122/DSCAM/SLC39A5/IMPG2/NIPBL/NHS/CHD7/CRYBA2/WNT5B/SOX8/INHBA/HIF1A/RD3/SLC17A7/MFAP5/CDON/KERA/BCAR3/BBS4/TTLL5
GOBP_REGIONALIZATION	223	-0.46063	-1.57663	7.3572e-05	0.00867207	0.00818724	3413	tags=35%, list=26%, signal=27%	TDRD1/PITX2/HOXB5/HOXA3/HOXC5/WNT2B/HEY2/MEGF8/ACVR2A/HOXC10/IRX2/SKI/HEYL/HOXD4/SOSTDC1/DZIP1L/CER1/MKS1/AXIN1/IFT52/HOXC6/VAX2/DLX1/FKBP8/MSX1/BMP1/GSC/YY1/SFRP2/GREM1/ACVR1/MSX2/LHX3/POFUT1/HOXA10/PAX2/FRS2/HIPK1/BMP4/NRP1/C1QA/BMPR2/CRKL/PLXNA2/PROP1/GDF11/ALDH1A2/EDN1/LRP5L/CLUAP1/TDRKH/EMX2/ABI1/DLL1/MESP2/HOXD3/FEZF2/SEMA3C/HOXD11/TBR1/TDRD10/IRX1/SIX3/TSHZ1/HHEX/HOXB2/MLLT3/HOXB4/SUFU/NOD…
GOBP_EYE_MORPHOGENESIS	93	-0.569787	-1.73413	8.01824e-05	0.00921497	0.00869979	2222	tags=33%, list=17%, signal=28%	FOXE3/YY1/ATP8A2/TWIST1/SP3/PAX2/FRS2/HIPK1/BMP4/SHROOM2/GDF11/MFAP2/VEGFA/DLL1/TFAP2A/SIX3/COL8A1/ALDH1A3/CRYGB/CRB1/GLI3/IFT122/DSCAM/IMPG2/NIPBL/SOX8/HIF1A/MFAP5/CDON/BCAR3/BBS4
GOBP_NEUTROPHIL_DEGRANULATION	14	0.88411	1.8542	0.000104628	0.0117311	0.0110753	728	tags=57%, list=5%, signal=54%	ITGAM/VAMP8/STXBP2/ITGB2/PTAFR/VAMP7/PRAM1/SPI1
GOBP_NEUROMUSCULAR_JUNCTION_DEVELOPMENT	37	-0.697895	-1.82772	0.000163269	0.0167334	0.0157979	2766	tags=49%, list=21%, signal=39%	P2RX2/SNTA1/COLQ/RER1/DVL1/LRRK2/LAMB2/CRKL/UNC13B/CNTNAP1/ANK3/CACNB4/CACNA1S/APP/MYCBP2/TNC/CHRNA1/DNAJA3
GOBP_RNA_LOCALIZATION	153	0.511831	1.68039	0.000163803	0.0167334	0.0157979	1516	tags=20%, list=11%, signal=18%	CETN2/SSB/ENY2/NUP37/CETN3/MAGOH/NUP88/NUP107/CCT2/NXF1/THOC7/SUPT6H/UPF1/FBL/ZC3H3/MVP/TOMM20/PCID2/UPF3B/ZNF385A/FLOT1/ATXN2/RUVBL2/XPO5/DKC1/TST/RAN/NUP133/NCBP1/ZNHIT3
GOBP_RNA_CATABOLIC_PROCESS	217	0.466722	1.5887	0.000162913	0.0167334	0.0157979	2738	tags=32%, list=20%, signal=26%	EIF3E/SSB/LSM5/ZCCHC7/LSM1/MAGOH/VIM/ZC3H12A/SKIV2L/ZCCHC17/RNH1/UPF1/LSM7/DCP1A/EXOSC1/FXR1/MYD88/DEDD2/PCID2/UPF3B/ANG/EXOSC9/EXOSC8/EXOSC7/DKC1/SERBP1/SAMD4B/ANGEL2/HSPA1B/HSPA1A/NCBP1/CNOT3/TNFRSF1B/EXOSC4/ZC3H4/MOV10/LARP1/ELAC2/TUT1/LRPPRC/ZC3H18/GRSF1/FASTK/MAPK14/SLC11A1/EIF4ENIF1/CNOT1/GTPBP1/RNASEH2B/FUS/MLH1/HNRNPC/EIF4A3/CPEB3/PRKCD/TBRG4/PATL1/EXOSC10/GSPT2/SLFN13/CNOT7/THRAP3/DHX36/…
GOBP_MRNA_PROCESSING	326	0.424792	1.50526	0.000162842	0.0167334	0.0157979	2353	tags=26%, list=18%, signal=22%	CWC15/ZMAT2/LSM5/LSM3/SNRPG/SNRPB2/PLRG1/LARP7/LSM1/WDR33/SLU7/GEMIN6/MAGOH/DDX1/CWF19L2/PPWD1/THOC7/SF3B4/COIL/FRG1/DHX16/WBP4/SRRM2/SUPT6H/DDX23/LSM7/RBM42/SNRPA1/PRPF18/SAFB2/ZC3H3/CLNS1A/EFTUD2/FXR1/SNRPF/PPIH/TSEN34/HSPA8/RBM23/DHX8/NUDT21/SF3A2/RALY/RBM25/PRMT5/PAF1/PTBP1/SNRPA/BUD31/TFIP11/NCBP1/RAVER1/AHCYL1/RSRC1/C9orf78/PRPF38A/THOC3/TUT1/RBM17/IWS1/GRSF1/SNRPD1/ZMAT5/RBM15/NUP98/PRPF31…
GOBP_ANTERIOR_POSTERIOR_PATTERN_SPECIFICATION	142	-0.502445	-1.62226	0.000172969	0.0172856	0.0163192	2169	tags=35%, list=16%, signal=30%	MYF5/TDRD1/HOXB5/HOXA3/HOXC5/WNT2B/HEY2/ACVR2A/HOXC10/SKI/HEYL/HOXD4/CER1/HOXC6/MSX1/YY1/SFRP2/MSX2/POFUT1/HOXA10/FRS2/HIPK1/BMP4/BMPR2/CRKL/PLXNA2/GDF11/ALDH1A2/LRP5L/TDRKH/EMX2/ABI1/DLL1/MESP2/HOXD3/FEZF2/SEMA3C/TDRD10/TSHZ1/HHEX/HOXB2/MLLT3/HOXB4/NODAL/GLI3/DKK1/TBX1/CFC1/HOXC4/CDON
GOBP_NUCLEAR_TRANSCRIBED_MRNA_CATABOLIC_PROCESS	97	0.56431	1.73606	0.000189713	0.0185556	0.0175182	2726	tags=36%, list=20%, signal=29%	EIF3E/SSB/ZCCHC7/LSM1/MAGOH/ZC3H12A/SKIV2L/UPF1/LSM7/DCP1A/UPF3B/EXOSC9/EXOSC8/EXOSC7/SAMD4B/NCBP1/CNOT3/EXOSC4/TUT1/EIF4ENIF1/CNOT1/MLH1/EIF4A3/CPEB3/PATL1/EXOSC10/GSPT2/CNOT7/THRAP3/DHX36/PAIP1/EDC4/PNRC2/DCP2/CASC3
GOBP_MYELOID_CELL_ACTIVATION_INVOLVED_IN_IMMUNE_RESPONSE	84	0.576488	1.73327	0.000203301	0.0194703	0.0183818	1752	tags=33%, list=13%, signal=29%	ITGAM/UNC13D/RAC2/DYSF/VAMP8/STXBP2/ITGB2/PTAFR/PYCARD/SBNO2/FES/VAMP7/GRN/PIK3CD/PRAM1/SPI1/MYD88/TYROBP/PTGDS/LILRA2/BTK/CBL/CD300A/PDPK1/SPHK2/SNX4/LAT2/VAMP2
GOBP_MRNA_CATABOLIC_PROCESS	179	0.479201	1.60179	0.000232761	0.0215511	0.0203463	2738	tags=32%, list=20%, signal=26%	EIF3E/SSB/LSM5/ZCCHC7/LSM1/MAGOH/VIM/ZC3H12A/SKIV2L/RNH1/UPF1/LSM7/DCP1A/FXR1/MYD88/PCID2/UPF3B/EXOSC9/EXOSC8/EXOSC7/SERBP1/SAMD4B/ANGEL2/HSPA1B/HSPA1A/NCBP1/CNOT3/EXOSC4/MOV10/LARP1/TUT1/FASTK/MAPK14/SLC11A1/EIF4ENIF1/CNOT1/GTPBP1/FUS/MLH1/HNRNPC/EIF4A3/CPEB3/PRKCD/TBRG4/PATL1/EXOSC10/GSPT2/CNOT7/THRAP3/DHX36/NUDT16L1/PAIP1/EDC4/PNRC2/DCP2/CASC3/RBM10
GOBP_SENSORY_ORGAN_MORPHOGENESIS	166	-0.486283	-1.59147	0.000234404	0.0215511	0.0203463	2248	tags=29%, list=17%, signal=24%	GATA2/ATP6V1B1/FOXE3/GSC/YY1/EYA1/ATP8A2/TWIST1/SLC44A4/SP3/DVL1/PAX2/KCNQ1/FRS2/HIPK1/BMP4/SHROOM2/GDF11/EDN1/MFAP2/VEGFA/DLL1/COL11A1/TFAP2A/SPRY2/SIX3/COL8A1/ALDH1A3/TSHZ1/CRYGB/MYO3B/LHFPL5/CRB1/GLI3/IFT122/DSCAM/IMPG2/NIPBL/CHD7/TBX1/SOX8/CYP26B1/HIF1A/MFAP5/CDON/CLRN1/BCAR3/BBS4
GOBP_PROCESS_UTILIZING_AUTOPHAGIC_MECHANISM	439	0.395129	1.42543	0.00027548	0.024831	0.0234428	1645	tags=21%, list=12%, signal=19%	TOMM7/UFC1/ATP6V1E1/TRAPPC4/ATP6V1D/ATP6V1G1/GBA/CLN3/TSPO/RGS19/CISD1/VAMP8/ATG16L2/VPS18/ZC3H12A/GAA/SPTLC2/TCIRG1/VPS29/TM9SF1/NLRP6/ATG2A/ATP6V0B/PYCARD/GAPDH/DAPK2/BNIP3/CAPNS1/ULK1/RNF31/IKBKG/TRIM27/NSFL1C/VAMP7/TMEM59/CTSD/FOXO1/TBC1D14/EEF1A1/VPS4A/VPS37B/VPS33B/TRIM21/MTMR14/DAPK3/TPCN2/WDR81/OSBPL7/S100A8/NRBP2/CHMP1A/OPTN/CHMP4A/MAPK3/CHMP5/TFEB/SEC16A/TSC2/TOLLIP/HSPA8/MFN2/RAB24/SIR…
GOBP_MRNA_TRANSPORT	97	0.559346	1.72079	0.000285406	0.025231	0.0238204	958	tags=15%, list=7%, signal=14%	CETN2/ENY2/NUP37/CETN3/MAGOH/NUP88/NUP107/NXF1/THOC7/SUPT6H/UPF1/ZC3H3/MVP/PCID2/UPF3B
GOBP_MITOCHONDRIAL_ELECTRON_TRANSPORT_CYTOCHROME_C_TO_OXYGEN	13	0.879966	1.82549	0.000328956	0.0280039	0.0264384	423	tags=46%, list=3%, signal=45%	COX6C/COX7C/COX7B/COX7A2/NDUFA4/COX6A1
GOBP_NUCLEOBASE_CONTAINING_COMPOUND_TRANSPORT	165	0.485025	1.61061	0.000323209	0.0280039	0.0264384	2098	tags=25%, list=16%, signal=21%	CETN2/SSB/ENY2/NUP37/CETN3/MAGOH/NUP88/NUP107/NXF1/THOC7/SUPT6H/UPF1/ABCD1/ZC3H3/MVP/TOMM20/P2RX7/SLC35C1/PCID2/UPF3B/SLC35A1/FLOT1/ATXN2/XPO5/RIPK1/TST/RAN/NUP133/NCBP1/SLC19A1/THOC3/LRPPRC/SLC29A3/SLC25A36/IWS1/NUP210/GLE1/NXT2/NUP98/SLC35B2/SLC35E3
GOBP_REGULATION_OF_GLUCOSE_TRANSMEMBRANE_TRANSPORT	50	-0.639377	-1.77018	0.000376082	0.0314336	0.0296763	2368	tags=36%, list=18%, signal=30%	TRIB3/HK2/OPN3/STXBP4/OSBPL8/APPL1/EDN1/KLF15/OCLN/NR4A3/CLIP3/NFE2L2/LEP/ADIPOQ/BRAF/PIK3R1/AKT1/APPL2
GOBP_TISSUE_MORPHOGENESIS	434	-0.391347	-1.41267	0.000383035	0.0314431	0.0296852	2963	tags=26%, list=22%, signal=21%	IRX2/TGFB2/SKI/NPNT/HEYL/SULF1/STIL/ANKRD6/TTC8/TNF/GPC4/DLG1/SOSTDC1/TGFBR2/WNT6/MKS1/AXIN1/TRAF3IP1/NTN1/IFT52/SLIT2/ADAM17/FST/CA2/FZD1/TNNC1/MSX1/TGFB1I1/HMGA2/SMAD1/SDC4/EYA1/SFRP2/TWIST1/GREM1/CTSZ/CTSH/ACVR1/KRT16/MYC/LIF/TPM1/MSX2/DLG3/DVL1/ITGA2/RET/PAX2/AGTR2/CSMD1/FRS2/EGF/BMP4/NRP1/BMPR2/SMURF2/AJAP1/JAG2/ALDH1A2/TNNT2/EDN1/CLASP2/LRP5L/CLUAP1/VEGFA/PRKAR1A/DLL1/SPEF1/MESP2/HAND2/COL1…
GOBP_TRNA_5_LEADER_REMOVAL	11	0.89214	1.78628	0.000409636	0.0330368	0.0311898	540	tags=18%, list=4%, signal=17%	SSB/RPP40
GOBP_ATP_BIOSYNTHETIC_PROCESS	56	0.635765	1.78835	0.000485369	0.0384697	0.036319	535	tags=16%, list=4%, signal=15%	NDUFA1/NDUFS5/NDUFB2/NDUFA8/NDUFS4/NDUFB3/NDUFB6/NDUFB5/NDUFS3
GOBP_CAMERA_TYPE_EYE_MORPHOGENESIS	74	-0.579622	-1.70329	0.000538512	0.0419583	0.0396126	2222	tags=38%, list=17%, signal=32%	FOXE3/YY1/ATP8A2/TWIST1/SP3/PAX2/FRS2/HIPK1/BMP4/SHROOM2/GDF11/VEGFA/DLL1/TFAP2A/SIX3/COL8A1/ALDH1A3/CRYGB/CRB1/GLI3/IFT122/DSCAM/IMPG2/SOX8/HIF1A/CDON/BCAR3/BBS4
GOBP_ACROSOME_REACTION	27	-0.719514	-1.72766	0.000570188	0.0429697	0.0405674	2276	tags=44%, list=17%, signal=37%	SPINK1/ROPN1B/POMZP3/PCSK4/PKDREJ/UNC13B/TRIM36/SYT6/SPESP1/CACNA1H/PLCB1/STXBP1
GOBP_CELL_ACTIVATION_INVOLVED_IN_IMMUNE_RESPONSE	242	0.439773	1.5162	0.000563951	0.0429697	0.0405674	2040	tags=27%, list=15%, signal=24%	ITGAM/UNC13D/APBB1IP/RAC2/DYSF/VAMP8/SWAP70/ZC3H12A/STXBP2/ITGB2/PTAFR/PYCARD/ITGAL/SBNO2/FES/SUPT6H/ANXA1/PGLYRP1/MYB/VAMP7/RELB/GRN/PIK3CD/PRAM1/SEMA4A/STAT6/SPI1/MSH6/RARA/LAMP1/RPS6/MYD88/TYROBP/PTGDS/GBF1/LILRA2/LRP1/BTK/CBL/CLEC4E/CCR6/CORO1A/LOXL3/CD300A/LCP1/SLC15A4/ZFPM1/PDPK1/SPHK2/SNX4/SMAD7/LILRB1/DOCK11/LAT2/IL6R/HLX/VAMP2/NCKAP1L/NFKBIZ/MAD2L2/PHF14/PLCG2/FGL2/LYN/SLC11A1/ZBTB7B
GOBP_NEUROTRANSMITTER_TRANSPORT	150	-0.481689	-1.56452	0.000617247	0.0450394	0.0425214	1947	tags=21%, list=15%, signal=18%	DVL1/SLC1A6/GPM6B/CHRM2/TACR2/SLC6A3/SV2B/LRRK2/RIMS4/SYN1/SLC4A8/UNC13B/STXBP5/SLC6A16/CACNB4/SLC18A1/SNAPIN/SNAP29/BACE1/BRAF/CNR1/SLC6A8/SLC6A7/OTOF/MEF2C/STXBP1/GRM4/SYT12/SYNJ1/SLC17A7/DOC2A/PDZD11
GOBP_SIGNAL_RELEASE	320	-0.411038	-1.44977	0.000611908	0.0450394	0.0425214	2293	tags=21%, list=17%, signal=18%	TNFRSF11A/SPINK1/ADRA1A/CYB5R4/FKBP1B/SLC44A4/STXBP4/LIF/MYRIP/DVL1/CRHR1/CHRM2/KCNQ1/TACR2/FGG/LRRK2/NLGN2/FAM3B/RIMS4/ACSL4/ADRA2B/EDN1/SYN1/FGB/LRP5L/VPS35/SLC4A8/C1QTNF3/TNFSF11/UNC13B/ADORA1/STXBP5/CACNB4/SYT6/BMP8A/SYT15/GRM2/RFX3/CYP19A1/SNAPIN/SNAP29/KCNA5/TFR2/NMB/LEP/MIF/ADORA3/BACE1/ADIPOQ/CHD7/BRAF/CNR1/OTOF/UBE2Q1/GALR1/MEF2C/STXBP1/GRM4/SYT12/INHBA/SYNJ1/HIF1A/GHRHR/DOC2A/SIRT4/ACVR…

## Sheet: Table S6
Table S6. HALLMARK Gene Set Pattern Analysis Based on Differential Expression Genes Between AD and Non-AD Samples
ID	setSize	enrichmentScore	NES	pvalue	p.adjust	qvalue	rank	leading_edge	core_enrichment
HALLMARK_OXIDATIVE_PHOSPHORYLATION	166	0.663924	2.18076	1e-10	3.59091e-09	3.02392e-09	581	tags=20%, list=4%, signal=20%	NDUFA1/COX17/MDH1/LDHB/ATP6V1E1/ACAT1/UQCRB/NDUFB2/NDUFA8/ACADVL/ATP6V1D/ATP6AP1/MRPS22/NDUFS4/ATP6V1G1/NDUFB3/COX6C/COX7C/UQCRQ/COX7B/VDAC3/TCIRG1/COX7A2/UQCRH/ATP6V0B/NDUFA4/COX6A1/ACADM/NDUFB6/NDUFB5/POR/NDUFS3/PDHB/UQCRC1
HALLMARK_MYC_TARGETS_V1	175	0.635053	2.10405	1.43636e-10	3.59091e-09	3.02392e-09	1503	tags=29%, list=11%, signal=26%	SSB/HSPE1/RPL6/ERH/SNRPG/SNRPB2/PSMA4/RSL1D1/GNL3/COPS5/UBE2E1/VDAC3/RPL22/PSMA6/CCT2/PSMC6/PGK1/PSMA2/SSBP1/POLE3/HDDC2/PSMD14/LSM7/CNBP/ILF2/DEK/SNRPA1/FBL/PCBP1/PRDX4/CLNS1A/VBP1/MCM7/PWP1/RPS10/RPS6/SET/MAD2L1/NAP1L1/HPRT1/UBE2L3/DDX18/EXOSC7/ABCE1/RUVBL2/SERBP1/RAN/SNRPA/BUB3/NCBP1/RPL34
HALLMARK_DNA_REPAIR	134	0.577901	1.86115	6.84706e-06	0.000114118	9.60991e-05	1269	tags=22%, list=9%, signal=20%	CETN2/RPA3/COX17/GTF2H5/POLR3GL/GTF2B/HCLS1/RBX1/POLR2A/GTF2A2/RALA/PRIM1/POLB/RPA2/BOLA2/POLE4/VPS37B/TAF1C/MRPL40/BCAP31/ADRM1/UPF3B/NUDT21/HPRT1/ZNF707/SEC61A1/POLD1/AK3/TAF12/GTF3C5
HALLMARK_HEME_METABOLISM	171	-0.506472	-1.67196	2.5892e-05	0.00032365	0.000272547	3054	tags=34%, list=23%, signal=27%	HEBP1/TFDP2/TAL1/PRDX2/BCAM/CAT/ACP5/XK/CTSE/CA1/FTCD/HMBS/ELL2/SPTB/RAP1GAP/RANBP10/HBZ/PSMD9/GLRX5/OSBP2/CA2/BLVRB/GYPA/SLC4A1/P4HA2/UBAC1/MINPP1/USP15/PC/HDGF/TNS1/GYPC/EPB42/KEL/HTATIP2/RBM38/NCOA4/GATA1/LMO2/PDZK1IP1/HBBP1/CTNS/RHAG/ADD2/FBXO9/RHCE/NUDT4/RHD/ADIPOR1/FBXO7/SLC6A8/SELENBP1/EIF2AK1/ALAS2/RCL1/SYNJ1/TRIM10/ANK1

## Sheet: Table S7
Table S7. Differiential MPP Signatures Analysis in AD and Non-AD Samples Based on Chi-squared Test
MPP Singnature	MPP Singnature Description	X-squared	df	p-value	p.adj
hsa00020-hsa00785	Citrate cycle (TCA cycle)- Lipoic acid metabolism	963.053	1	1.92907e-211	3.62068e-208
hsa00030-hsa00910	Pentose phosphate pathway- Nitrogen metabolism	967.02	1	2.6482e-212	5.1745e-209
hsa00040-hsa00140	Pentose and glucuronate interconversions- Steroid hormone biosynthesis	967.02	1	2.6482e-212	5.1745e-209
hsa00040-hsa00260	Pentose and glucuronate interconversions- Glycine, serine and threonine metabolism	955.167	1	9.99164e-210	1.84546e-206
hsa00040-hsa00780	Pentose and glucuronate interconversions- Biotin metabolism	967.02	1	2.6482e-212	5.1745e-209
hsa00040-hsa00982	Pentose and glucuronate interconversions- Drug metabolism - cytochrome P450	967.02	1	2.6482e-212	5.1745e-209
hsa00051-hsa00470	Fructose and mannose metabolism- D-Amino acid metabolism	967.02	1	2.6482e-212	5.1745e-209
hsa00051-hsa00533	Fructose and mannose metabolism- Glycosaminoglycan biosynthesis - keratan sulfate	967.02	1	2.6482e-212	5.1745e-209
hsa00051-hsa00600	Fructose and mannose metabolism- Sphingolipid metabolism	967.02	1	2.6482e-212	5.1745e-209
hsa00052-hsa00290	Galactose metabolism- Valine, leucine and isoleucine biosynthesis	967.02	1	2.64816e-212	5.1745e-209
hsa00052-hsa00310	Galactose metabolism- Lysine degradation	963.053	1	1.92907e-211	3.62068e-208
hsa00052-hsa00360	Galactose metabolism- Phenylalanine metabolism	967.02	1	2.64816e-212	5.1745e-209
hsa00052-hsa00512	Galactose metabolism- Mucin type O-glycan biosynthesis	967.02	1	2.6482e-212	5.1745e-209
hsa00052-hsa00515	Galactose metabolism- Mannose type O-glycan biosynthesis	967.02	1	2.6482e-212	5.1745e-209
hsa00052-hsa00533	Galactose metabolism- Glycosaminoglycan biosynthesis - keratan sulfate	967.02	1	2.6482e-212	5.1745e-209
hsa00052-hsa00600	Galactose metabolism- Sphingolipid metabolism	967.02	1	2.6482e-212	5.1745e-209
hsa00052-hsa00760	Galactose metabolism- Nicotinate and nicotinamide metabolism	967.02	1	2.64816e-212	5.1745e-209
hsa00053-hsa00592	Ascorbate and aldarate metabolism- alpha-Linolenic acid metabolism	963.053	1	1.92897e-211	3.62068e-208
hsa00053-hsa00980	Ascorbate and aldarate metabolism- Metabolism of xenobiotics by cytochrome P450	963.053	1	1.92907e-211	3.62068e-208
hsa00061-hsa00780	Fatty acid biosynthesis- Biotin metabolism	967.02	1	2.6482e-212	5.1745e-209
hsa00062-hsa00350	Fatty acid elongation- Tyrosine metabolism	967.02	1	2.64816e-212	5.1745e-209
hsa00062-hsa00534	Fatty acid elongation- Glycosaminoglycan biosynthesis - heparan sulfate / heparin	967.02	1	2.6482e-212	5.1745e-209
hsa00100-hsa00260	Biosynthesis of steroids- Glycine, serine and threonine metabolism	967.02	1	2.6482e-212	5.1745e-209
hsa00100-hsa00592	Biosynthesis of steroids- alpha-Linolenic acid metabolism	967.02	1	2.6482e-212	5.1745e-209
hsa00120-hsa00232	Primary bile acid biosynthesis- Caffeine metabolism	963.053	1	1.92897e-211	3.62068e-208
hsa00120-hsa00830	Primary bile acid biosynthesis- Retinol metabolism	967.02	1	2.6482e-212	5.1745e-209
hsa00130-hsa00260	Ubiquinone and other terpenoid-quinone biosynthesis- Glycine, serine and threonine metabolism	967.02	1	2.6482e-212	5.1745e-209
hsa00130-hsa00592	Ubiquinone and other terpenoid-quinone biosynthesis- alpha-Linolenic acid metabolism	959.102	1	1.39378e-210	2.58127e-207
hsa00140-hsa00591	Steroid hormone biosynthesis- Linoleic acid metabolism	967.02	1	2.6482e-212	5.1745e-209
hsa00220-hsa00232	Arginine biosynthesis- Caffeine metabolism	967.02	1	2.64816e-212	5.1745e-209
hsa00220-hsa00430	Arginine biosynthesis- Taurine and hypotaurine metabolism	967.02	1	2.64816e-212	5.1745e-209
hsa00230-hsa00340	Purine metabolism- Histidine metabolism	963.053	1	1.92907e-211	3.62068e-208
hsa00230-hsa00512	Purine metabolism- Mucin type O-glycan biosynthesis	967.02	1	2.64816e-212	5.1745e-209
hsa00240-hsa00290	Pyrimidine metabolism- Valine, leucine and isoleucine biosynthesis	959.102	1	1.39378e-210	2.58127e-207
hsa00240-hsa01040	Pyrimidine metabolism- Biosynthesis of unsaturated fatty acids	967.02	1	2.6482e-212	5.1745e-209
hsa00250-hsa00430	Alanine, aspartate and glutamate metabolism- Taurine and hypotaurine metabolism	967.02	1	2.64816e-212	5.1745e-209
hsa00260-hsa00430	Glycine, serine and threonine metabolism- Taurine and hypotaurine metabolism	967.02	1	2.64816e-212	5.1745e-209
hsa00270-hsa00400	Cysteine and methionine metabolism- Phenylalanine, tyrosine and tryptophan biosynthesis	967.02	1	2.6482e-212	5.1745e-209
hsa00270-hsa00450	Cysteine and methionine metabolism- Selenocompound metabolism	967.02	1	2.6482e-212	5.1745e-209
hsa00270-hsa00500	Cysteine and methionine metabolism- Starch and sucrose metabolism	963.053	1	1.92907e-211	3.62068e-208
hsa00270-hsa00513	Cysteine and methionine metabolism- Various types of N-glycan biosynthesis	963.053	1	1.92897e-211	3.62068e-208
hsa00270-hsa00562	Cysteine and methionine metabolism- Inositol phosphate metabolism	967.02	1	2.64816e-212	5.1745e-209
hsa00270-hsa00670	Cysteine and methionine metabolism- One carbon pool by folate	967.02	1	2.6482e-212	5.1745e-209
hsa00270-hsa00983	Cysteine and methionine metabolism- Drug metabolism - other enzymes	967.02	1	2.64816e-212	5.1745e-209
hsa00280-hsa00590	Valine, leucine and isoleucine degradation- Arachidonic acid metabolism	967.02	1	2.6482e-212	5.1745e-209
hsa00280-hsa01040	Valine, leucine and isoleucine degradation- Biosynthesis of unsaturated fatty acids	963.053	1	1.92907e-211	3.62068e-208
hsa00290-hsa00591	Valine, leucine and isoleucine biosynthesis- Linoleic acid metabolism	967.02	1	2.64816e-212	5.1745e-209
hsa00310-hsa00350	Lysine degradation- Tyrosine metabolism	967.02	1	2.64816e-212	5.1745e-209
hsa00330-hsa00470	Arginine and proline metabolism- D-Amino acid metabolism	967.02	1	2.6482e-212	5.1745e-209
hsa00340-hsa00430	Histidine metabolism- Taurine and hypotaurine metabolism	967.02	1	2.64816e-212	5.1745e-209
hsa00360-hsa00592	Phenylalanine metabolism- alpha-Linolenic acid metabolism	959.102	1	1.39378e-210	2.58127e-207
hsa00380-hsa00512	Tryptophan metabolism- Mucin type O-glycan biosynthesis	963.053	1	1.92907e-211	3.62068e-208
hsa00380-hsa00534	Tryptophan metabolism- Glycosaminoglycan biosynthesis - heparan sulfate / heparin	967.02	1	2.6482e-212	5.1745e-209
hsa00380-hsa00590	Tryptophan metabolism- Arachidonic acid metabolism	963.053	1	1.92897e-211	3.62068e-208
hsa00400-hsa00982	Phenylalanine, tyrosine and tryptophan biosynthesis- Drug metabolism - cytochrome P450	967.02	1	2.6482e-212	5.1745e-209
hsa00410-hsa00650	beta-Alanine metabolism- Butanoate metabolism	967.02	1	2.6482e-212	5.1745e-209
hsa00440-hsa00980	Phosphonate and phosphinate metabolism- Metabolism of xenobiotics by cytochrome P450	967.02	1	2.6482e-212	5.1745e-209
hsa00450-hsa00515	Selenocompound metabolism- Mannose type O-glycan biosynthesis	967.02	1	2.6482e-212	5.1745e-209
hsa00450-hsa00534	Selenocompound metabolism- Glycosaminoglycan biosynthesis - heparan sulfate / heparin	959.102	1	1.39392e-210	2.58127e-207
hsa00480-hsa00510	Glutathione metabolism- N-Glycan biosynthesis	967.02	1	2.6482e-212	5.1745e-209
hsa00480-hsa00531	Glutathione metabolism- Glycosaminoglycan degradation	963.053	1	1.92907e-211	3.62068e-208
hsa00480-hsa00730	Glutathione metabolism- Thiamine metabolism	967.02	1	2.6482e-212	5.1745e-209
hsa00500-hsa00534	Starch and sucrose metabolism- Glycosaminoglycan biosynthesis - heparan sulfate / heparin	967.02	1	2.6482e-212	5.1745e-209
hsa00500-hsa00650	Starch and sucrose metabolism- Butanoate metabolism	963.053	1	1.92907e-211	3.62068e-208
hsa00510-hsa00514	N-Glycan biosynthesis- Other types of N-glycan biosynthesis	967.02	1	2.64816e-212	5.1745e-209
hsa00510-hsa00565	N-Glycan biosynthesis- Ether lipid metabolism	963.053	1	1.92897e-211	3.62068e-208
hsa00510-hsa00760	N-Glycan biosynthesis- Nicotinate and nicotinamide metabolism	967.02	1	2.6482e-212	5.1745e-209
hsa00510-hsa00790	N-Glycan biosynthesis- Folate biosynthesis	963.053	1	1.92897e-211	3.62068e-208
hsa00511-hsa00604	Other types of O-glycan biosynthesis- Glycosphingolipid biosynthesis - ganglio series	955.167	1	9.99164e-210	1.84546e-206
hsa00511-hsa00620	Other types of O-glycan biosynthesis- Pyruvate metabolism	967.02	1	2.6482e-212	5.1745e-209
hsa00511-hsa00730	Other types of O-glycan biosynthesis- Thiamine metabolism	967.02	1	2.64816e-212	5.1745e-209
hsa00511-hsa00860	Other types of O-glycan biosynthesis- Porphyrin and chlorophyll metabolism	967.02	1	2.6482e-212	5.1745e-209
hsa00511-hsa00920	Other types of O-glycan biosynthesis- Sulfur metabolism	963.053	1	1.92907e-211	3.62068e-208
hsa00512-hsa00592	Mucin type O-glycan biosynthesis- alpha-Linolenic acid metabolism	963.053	1	1.92897e-211	3.62068e-208
hsa00512-hsa00780	Mucin type O-glycan biosynthesis- Biotin metabolism	967.02	1	2.6482e-212	5.1745e-209
hsa00513-hsa00514	Various types of N-glycan biosynthesis- Other types of N-glycan biosynthesis	967.02	1	2.64816e-212	5.1745e-209
hsa00513-hsa00760	Various types of N-glycan biosynthesis- Nicotinate and nicotinamide metabolism	967.02	1	2.6482e-212	5.1745e-209
hsa00520-hsa00533	Amino sugar and nucleotide sugar metabolism- Glycosaminoglycan biosynthesis - keratan sulfate	967.02	1	2.6482e-212	5.1745e-209
hsa00520-hsa00564	Amino sugar and nucleotide sugar metabolism- Glycerophospholipid metabolism	963.053	1	1.92907e-211	3.62068e-208
hsa00524-hsa00780	Neomycin, kanamycin and gentamicin biosynthesis- Biotin metabolism	967.02	1	2.6482e-212	5.1745e-209
hsa00524-hsa00982	Neomycin, kanamycin and gentamicin biosynthesis- Drug metabolism - cytochrome P450	967.02	1	2.64816e-212	5.1745e-209
hsa00531-hsa01040	Glycosaminoglycan degradation- Biosynthesis of unsaturated fatty acids	967.02	1	2.6482e-212	5.1745e-209
hsa00533-hsa00592	Glycosaminoglycan biosynthesis - keratan sulfate- alpha-Linolenic acid metabolism	967.02	1	2.6482e-212	5.1745e-209
hsa00533-hsa00780	Glycosaminoglycan biosynthesis - keratan sulfate- Biotin metabolism	963.053	1	1.92907e-211	3.62068e-208
hsa00533-hsa00982	Glycosaminoglycan biosynthesis - keratan sulfate- Drug metabolism - cytochrome P450	967.02	1	2.64816e-212	5.1745e-209
hsa00562-hsa01040	Inositol phosphate metabolism- Biosynthesis of unsaturated fatty acids	967.02	1	2.6482e-212	5.1745e-209
hsa00563-hsa00640	Glycosylphosphatidylinositol (GPI)-anchor biosynthesis- Propanoate metabolism	967.02	1	2.64816e-212	5.1745e-209
hsa00563-hsa00670	Glycosylphosphatidylinositol (GPI)-anchor biosynthesis- One carbon pool by folate	959.102	1	1.39392e-210	2.58127e-207
hsa00563-hsa00770	Glycosylphosphatidylinositol (GPI)-anchor biosynthesis- Pantothenate and CoA biosynthesis	967.02	1	2.6482e-212	5.1745e-209
hsa00564-hsa00565	Glycerophospholipid metabolism- Ether lipid metabolism	963.053	1	1.92907e-211	3.62068e-208
hsa00564-hsa00590	Glycerophospholipid metabolism- Arachidonic acid metabolism	963.053	1	1.92907e-211	3.62068e-208
hsa00565-hsa00650	Ether lipid metabolism- Butanoate metabolism	963.053	1	1.92907e-211	3.62068e-208
hsa00565-hsa00780	Ether lipid metabolism- Biotin metabolism	967.02	1	2.6482e-212	5.1745e-209
hsa00565-hsa00980	Ether lipid metabolism- Metabolism of xenobiotics by cytochrome P450	967.02	1	2.64816e-212	5.1745e-209
hsa00590-hsa00592	Arachidonic acid metabolism- alpha-Linolenic acid metabolism	967.02	1	2.64816e-212	5.1745e-209
hsa00590-hsa00780	Arachidonic acid metabolism- Biotin metabolism	967.02	1	2.6482e-212	5.1745e-209
hsa00590-hsa00980	Arachidonic acid metabolism- Metabolism of xenobiotics by cytochrome P450	967.02	1	2.64816e-212	5.1745e-209
hsa00604-hsa00790	Glycosphingolipid biosynthesis - ganglio series- Folate biosynthesis	963.053	1	1.92907e-211	3.62068e-208
hsa00620-hsa00760	Pyruvate metabolism- Nicotinate and nicotinamide metabolism	967.02	1	2.6482e-212	5.1745e-209
hsa00620-hsa00790	Pyruvate metabolism- Folate biosynthesis	967.02	1	2.64816e-212	5.1745e-209
hsa00640-hsa00760	Propanoate metabolism- Nicotinate and nicotinamide metabolism	955.167	1	9.99164e-210	1.84546e-206
hsa00640-hsa01040	Propanoate metabolism- Biosynthesis of unsaturated fatty acids	967.02	1	2.6482e-212	5.1745e-209
hsa00650-hsa00830	Butanoate metabolism- Retinol metabolism	967.02	1	2.64816e-212	5.1745e-209
hsa00670-hsa01040	One carbon pool by folate- Biosynthesis of unsaturated fatty acids	967.02	1	2.6482e-212	5.1745e-209
hsa00730-hsa01040	Thiamine metabolism- Biosynthesis of unsaturated fatty acids	967.02	1	2.6482e-212	5.1745e-209
hsa00740-hsa00980	Riboflavin metabolism- Metabolism of xenobiotics by cytochrome P450	967.02	1	2.64816e-212	5.1745e-209
hsa00750-hsa00760	Vitamin B6 metabolism- Nicotinate and nicotinamide metabolism	967.02	1	2.6482e-212	5.1745e-209
hsa00750-hsa00770	Vitamin B6 metabolism- Pantothenate and CoA biosynthesis	963.053	1	1.92907e-211	3.62068e-208
hsa00760-hsa00980	Nicotinate and nicotinamide metabolism- Metabolism of xenobiotics by cytochrome P450	967.02	1	2.64816e-212	5.1745e-209
hsa00920-hsa01040	Sulfur metabolism- Biosynthesis of unsaturated fatty acids	955.167	1	9.99164e-210	1.84546e-206
hsa00983-hsa01040	Drug metabolism - other enzymes- Biosynthesis of unsaturated fatty acids	963.053	1	1.92907e-211	3.62068e-208

## Sheet: Table S8
Table S8. Top 10 Metabolic Pathways of core metabolic network constructed based on differential analysis of MPP signatures between AD and non-AD group.
Rank	KEGG ID	Score	KEGG Metabolism Pathway Description
1	hsa01040	9	Biosynthesis of unsaturated fatty acids
2	hsa00052	8	Galactose metabolism
3	hsa00780	7	Biotin metabolism
3	hsa00270	7	Cysteine and Methionine metabolism
3	hsa00760	7	Nicotinate and Nicotinamide metabolism
3	hsa00592	7	alpha-Linolenic acid metabolism
7	hsa00533	6	Glycosaminoglycan biosynthesis - Kerata sulfate
7	hsa00590	6	Arachidonic acid metabolism
7	hsa00980	6	Metabolism of xenobiotics by cytochrome
10	hsa00512	5	Mucin type O-glycan biosynthesis
